# Supplementary material for: The Gonococcal Transcriptome during Infection of the Lower Genital Tract in Women
Source: PLoS One. 2015 Aug 5;10(8):e0133982. doi: 10.1371/journal.pone.0133982 (PMC4526530; doi:10.1371/journal.pone.0133982)
Supplement: S1 Table — * Expression is defined as the RPKM level when aligning RNA isolated from Subjects 1–4 to the NCCP11945 strain of N. gonorrhoeae. ** Expression is defined as the RPKM level when aligning RNA isolated from the infecting strain of Subjects 1–3 after 3 hours of growth in CDM to the NCCP11945 strain of N. gonorrhoeae. Subject 4 was negative for N. gonorrhoeae by plating and so an infecting strain was not isolated. (XLSX) [file pone.0133982.s001.xlsx]

## Sheet: Sheet1
Supplementary Table 1: Alignment of RNA from all Subjects and from infecting strains of Subjects 1-3 to the NCCP11945 strain of N. gonorrhoeae
* Expression is defined as the RPKM level when aligning RNA isolated from Subjects 1-4 to the NCCP11945 strain of N. gonorrhoeae.
** Expression is defined as the RPKM level when aligning RNA isolated from the infecting strain of Subjects 1-3 after 3 hours of growth in Chemically Defined Media (CDM) to the NCCP11945 strain of N. gonorrhoeae. Subject 4 was negative for N. gonorrhoeae by plating and so an infecting strain was not isolated.
Transcription Start Site	Translation Start Site	Translation Stop Site	Transcription Stop Site	Strand	Name	Locus Tag	Category	Product	Expression Subject 1*	Expression Subject 2*	Expression Subject 3*	Expression Subject 4*	Expression CDM 1**	Expression CDM 2**	Expression CDM 3**
	206	1714		+	dnaA	NGK_0001	Replication	chromosomal replication initiation protein	127	12	55	102	126	79	118
1794	1794	2417		+	-	NGK_0002	Replication	DNA polymerase III subunit beta	88	37	88	103	308	125	310
	2393	2896		+	-	NGK_0003	Replication	DNA polymerase III subunit beta	18	56	51	128	100	185	164
	5252	3045		-	-	NGK_0004	Metabolism	polyphosphate kinase	4	13	0	1	25	15	12
	5714	5271		-	-	NGK_0005	Membrane	Periplasmic protein	31	62	0	0	38	0	45
	6050	5721		-	-	NGK_0006	Lipoprotein	lipoprotein	30	0	52	15	67	116	28
	6237	6064		-	-	NGK_0007	Lipoprotein	lipoprotein	28	153	26	81	377	317	70
6440	6440	6234		-	-	NGK_0008	Hypothetical	hypothetical protein	0	0	0	111	170	129	25
	6504	9134		+	leuS	NGK_0009	Translation	leucyl-tRNA synthetase	26	42	31	83	61	52	72
	9363	10154		+	-	NGK_0010	DNA Metabolism	dam-replacing protein	0	0	66	21	28	33	0
	10151	10291		+	-	NGK_0011	DNA Metabolism	putative type II restriction endonuclease	0	33	0	99	94	118	0
	10284	10436		+	-	NGK_0012	Metabolism	Putative Modification methylase DpnIIB	0	177	0	56	0	90	0
	10433	10768		+	-	NGK_0013	Metabolism	putative modification methylase	18	0	0	23	25	14	0
	10814	11092		+	-	NGK_0014	Metabolism	putative modification methylase	0	0	101	84	0	7	0
	11164	11544		+	-	NGK_0015	Hypothetical	hypothetical protein	0	0	0	32	50	63	53
	12306	12094		-	-	NGK_0016	Hypothetical	hypothetical protein	0	0	0	5	15	3	41
	12727	12416		-	-	NGK_0017	Metabolism	Helix-turn-helix family protein	27	0	119	207	114	276	22
	12966	12724		-	-	NGK_0018	Hypothetical	hypothetical protein	127	118	0	438	183	806	165
	13091	12963		-	-	NGK_0019	Hypothetical	hypothetical protein	172	0	198	818	457	1264	423
	13340	13624		+	-	NGK_0020	Hypothetical	hypothetical protein	0	0	0	0	0	0	0
	13787	13906		+	-	NGK_0021	Hypothetical	hypothetical protein	0	0	0	0	0	0	0
14430	14430	14080	14080	-	secG	NGK_0022	Transport	preprotein translocase subunit SecG	611	241	532	771	1244	2409	565
	15192	14437		-	tpiA	NGK_0023	Metabolism	triosephosphate isomerase	312	101	47	224	527	163	679
	15274	15393		+	-	NGK_0024	Hypothetical	hypothetical protein	0	0	0	23	15	15	21
	15381	15896	15896	+	-	NGK_0025	Hypothetical	hypothetical protein	137	117	0	119	53	92	71
	15999	16655	16655	+	-	NGK_0026	Metabolism	protein-L-isoaspartate O-methyltransferase	265	121	41	260	141	184	58
	16688	17059		+	-	NGK_0027	Hypothetical	hypothetical protein	0	0	0	42	56	1	55
	19119	19334		+	-	NGK_0028	Hypothetical	hypothetical protein	0	77	0	6	10	0	44
	19049	17322		-	-	NGK_0029	Iron	TonB-dependent receptor	0	0	0	0	0	0	0
	20075	19752		-	-	NGK_0030	Hypothetical	hypothetical protein	0	0	0	0	0	0	0
	21083	21208		+	-	NGK_0031	Hypothetical	hypothetical protein	0	0	0	0	0	0	0
	21079	20108		-	-	NGK_0032	Iron	Ferric enterobactin transporter binding protein	0	0	0	0	0	0	0
	21315	22271		+	-	NGK_0033	Regulator	putative AraC-family transcriptional regulator	0	0	0	23	3	1	0
	24399	22384		-	-	NGK_0034	Metabolism	putative prolyl endopeptidase	13	18	0	4	25	7	28
	25805	24495		-	-	NGK_0035	Metabolism	N-acetylglutamate synthase	25	35	0	11	36	9	7
	26230	25802		-	-	NGK_0036	Hypothetical	hypothetical protein	0	105	0	2	21	7	0
	26945	26304		-	pyrE	NGK_0037	Metabolism	orotate phosphoribosyltransferase	58	73	10	88	32	23	13
	27744	27007		-	-	NGK_0038	Hypothetical	hypothetical protein	62	27	33	5	36	15	22
	28178	27738		-	-	NGK_0039	Metabolism	putative acetyltransferase	10	62	0	20	18	18	0
	28852	28175		-	-	NGK_0040	Hypothetical	hypothetical protein	74	34	0	45	45	25	50
	29800	28991		-	-	NGK_0041	Hypothetical	hypothetical protein	8	0	0	40	24	29	15
31126	31126	29987	29987	-	-	NGK_0042	Metabolism	fructose-1,6-bisphosphate aldolase	102	78	86	131	108	117	96
	31245	32162		+	-	NGK_0043	DNA Metabolism	putative site-specific recombinase	13	14	0	6	23	20	13
	32247	34160		+	-	NGK_0044	Metabolism	1-deoxy-D-xylulose-5-phosphate synthase	88	12	88	52	92	63	56
	34228	34401		+	-	NGK_0045	Hypothetical	hypothetical protein	0	0	0	0	23	2	0
	35739	35885		+	-	NGK_0046	Hypothetical	hypothetical protein	0	0	0	1	0	8	21
	35735	34407		-	-	NGK_0047	Metabolism	(dimethylallyl)adenosine tRNA methylthiotransferase	79	21	0	10	16	30	7
	35932	36093		+	-	NGK_0048	Hypothetical	hypothetical protein	53	0	0	64	44	77	0
	36496	36335		-	-	NGK_0049	Hypothetical	hypothetical protein	0	83	0	0	10	0	5
	36509	37789		+	-	NGK_0050	Metabolism	glutamate-1-semialdehyde aminotransferase	120	1	63	49	87	57	71
	38016	37888		-	-	NGK_0051	Hypothetical	hypothetical protein	16	0	0	0	15	38	19
	38606	38013		-	-	NGK_0052	Hypothetical	hypothetical protein	0	0	0	16	19	2	16
38835	38835	38716		-	-	NGK_0053	Hypothetical	hypothetical protein	0	0	0	108	167	40	0
	39658	39095		-	-	NGK_0054	DNA Metabolism	oligoribonuclease	80	0	0	27	44	48	46
	40611	39676		-	prmA	NGK_0055	Translation	50S ribosomal protein L11 methyltransferase	5	15	29	7	19	25	23
	42028	40667		-	-	NGK_0056	Metabolism	acetyl-CoA carboxylase, biotin carboxylase	62	69	15	37	48	52	27
	42603	42142		-	-	NGK_0057	Metabolism	acetyl-CoA carboxylase biotin carboxyl carrier protein subunit	11	68	0	136	29	55	26
	42842	42585		-	-	NGK_0058	Hypothetical	hypothetical protein	16	0	106	65	1	29	17
	42929	43999		+	queA	NGK_0059	Metabolism	S-adenosylmethionine--tRNA ribosyltransferase-isomerase	9	0	0	44	58	30	51
	44115	43996		-	-	NGK_0060	Hypothetical	hypothetical protein	0	0	0	0	0	9	71
	46626	44200	44200	-	-	NGK_0061	Metabolism	carbamoyl phosphate synthase large subunit	141	48	31	50	175	72	151
47414	47414	46647		-	-	NGK_0062	Metabolism	carbamoyl phosphate synthase large subunit	236	64	25	147	123	104	198
	47762	47421		-	-	NGK_0063	Hypothetical	hypothetical protein	0	0	0	2	24	26	35
	48838	48692		-	-	NGK_0064	Hypothetical	hypothetical protein	68	0	0	16	100	50	93
	50105	49716	49716	-	-	NGK_0065	Hypothetical	hypothetical protein	0	0	41	63	164	64	133
	50435	50268		-	-	NGK_0066	Translation	30S ribosomal protein S15	62	0	0	9	38	24	0
	51900	50701		-	-	NGK_0067	Metabolism	carbamoyl phosphate synthase small subunit	56	88	91	56	70	53	60
	52126	52010		-	-	NGK_0068	Hypothetical	hypothetical protein	0	0	0	0	0	13	0
	52226	52420		+	-	NGK_0069	Hypothetical	hypothetical protein	0	0	0	2	0	0	0
	52695	52549		-	-	NGK_0070	Hypothetical	hypothetical protein	0	0	0	0	45	27	66
	52999	53175		+	-	NGK_0071	Hypothetical	hypothetical protein	0	0	0	0	4	0	0
	53156	53401		+	-	NGK_0072	Hypothetical	hypothetical protein	0	0	0	0	0	0	0
	53597	53710		+	-	NGK_0073	Hypothetical	hypothetical protein	0	0	0	0	0	0	0
	56851	53684	53684	-	-	NGK_0074	Pilin	PilC2	65	48	64	115	100	125	194
	56951	57115		+	-	NGK_0075	Hypothetical	hypothetical protein	0	0	0	0	2	0	0
	57618	57454		-	-	NGK_0076	Hypothetical	hypothetical protein	32	0	0	40	28	0	0
	57898	57734		-	-	NGK_0077	Hypothetical	hypothetical protein	0	0	0	11	19	0	0
	58287	58487		+	-	NGK_0078	Hypothetical	hypothetical protein	0	0	0	0	12	0	0
	60250	59171		-	-	NGK_0079	Translation	putative atpase	57	33	25	25	59	44	68
	60624	61133		+	-	NGK_0080	Energy Metabolism	putative thioredoxin	0	0	0	0	43	42	21
	61181	61294		+	-	NGK_0081	Hypothetical	hypothetical protein	0	0	160	10	35	32	98
61474	61474	61914	61914	+	-	NGK_0082	Regulator	putative marR-family transcriptional regulator	774	254	365	1576	748	599	758
	62029	62529		+	-	NGK_0083	Energy Metabolism	putative flavoprotein oxidoreductase	83	0	48	55	138	116	220
	62545	63240		+	-	NGK_0084	Transport	putative sugar-phosphate transferase	7	34	8	31	45	40	72
	63704	63294		-	-	NGK_0085	Membrane	membrane protein	12	40	0	19	16	13	51
	63879	65555		+	-	NGK_0086	Metabolism	formate--tetrahydrofolate ligase	87	148	63	37	99	88	56
	65669	66760		+	-	NGK_0087	Metabolism	GTP-dependent nucleic acid-binding protein EngD	105	42	68	72	132	64	97
	66789	67037		+	-	NGK_0088	Hypothetical	hypothetical protein	0	0	42	19	7	25	10
	67034	68032		+	-	NGK_0089	Metabolism	putative lipo-oligosaccharide acyltransferase	7	0	0	2	22	9	36
	68109	68909		+	-	NGK_0090	Metabolism	putative lipo-oligosaccharide acyltransferase	7	0	0	12	19	2	36
	68971	70266		+	-	NGK_0091	Translation	putative tyrosyl-tRNA synthase	48	22	0	23	30	37	15
	70272	70454		+	-	NGK_0092	Pilin	truncated pilin	0	0	0	0	3	0	0
	70711	70550		-	-	NGK_0093	Hypothetical	hypothetical protein	0	0	0	34	34	52	120
	70729	70866		+	-	NGK_0094	Hypothetical	hypothetical protein	24	0	30	0	14	0	34
	70941	71099		+	-	NGK_0095	Hypothetical	hypothetical protein	40	0	0	7	7	0	19
71756	71756	71073	71073	-	-	NGK_0096	Membrane	outer membrane protein	993	199	730	423	946	1497	769
	72059	71862		-	-	NGK_0097	Transport	sugar ABC transporter, ATP-binding protein	0	10	50	43	17	13	41
	72087	73043		+	-	NGK_0098	Metabolism	bifunctional riboflavin kinase/FMN adenylyltransferase	24	29	0	25	79	59	34
73068	73068	73181		+	-	NGK_0099	Hypothetical	hypothetical protein	0	17	0	250	40	24	11
	73185	75974		+	ileS	NGK_0100	Translation	isoleucyl-tRNA synthetase	74	41	29	82	98	69	49
	76381	76190		-	-	NGK_0101	Hypothetical	hypothetical protein	31	139	0	3	80	41	51
77063	77063	76395	76395	-	-	NGK_0102	Membrane	opacity protein V28	1105	350	345	323	493	887	197
	77312	77196		-	-	NGK_0103	Hypothetical	hypothetical protein	0	95	16	6	14	8	44
	78024	78152		+	-	NGK_0104	Pilin	pilS cassette	0	0	0	6	0	6	0
	78159	78782		+	lspA	NGK_0105	Lipoprotein	lipoprotein signal peptidase	42	0	44	99	128	54	80
	78812	79780		+	ispH	NGK_0106	Metabolism	4-hydroxy-3-methylbut-2-enyl diphosphate reductase	103	22	46	104	91	60	69
	79881	80330		+	-	NGK_0107	Transposase	IS1106 transposase	43	63	124	58	4	6	7
	81196	80537		-	-	NGK_0108	Metabolism	putative phosphatase	60	0	0	4	10	5	57
	81344	81571		+	-	NGK_0109	Iron	TonB-dependent receptor	0	0	0	0	0	0	12
	81623	82060		+	-	NGK_0110	Iron	TonB-dependent receptor	0	0	0	0	0	12	0
	82130	82450		+	-	NGK_0111	Hypothetical	hypothetical protein	0	0	0	0	0	0	0
	82438	83019		+	-	NGK_0112	Metabolism	Putative esterase	0	0	0	0	1	0	0
	87146	83712		-	-	NGK_0113	Replication	putative DNA polymerase III, alpha subunit	26	5	3	19	37	21	21
	87159	87320		+	-	NGK_0114	Hypothetical	hypothetical protein	0	0	0	0	1	0	0
	87431	87667		+	-	NGK_0115	Hypothetical	hypothetical protein	0	16	0	7	10	2	0
	87679	87912		+	-	NGK_0116	Hypothetical	hypothetical protein	25	57	117	111	77	115	23
	87890	88093		+	-	NGK_0117	Hypothetical	hypothetical protein	78	0	80	72	83	47	35
	88292	88161		-	-	NGK_0118	Hypothetical	hypothetical protein	0	0	0	0	0	0	0
	88388	89224		+	-	NGK_0119	Hypothetical	hypothetical protein	52	0	0	14	22	5	103
	90634	89276		-	avtA	NGK_0120	Amino Acid Metabolism	valine--pyruvate transaminase	4	0	0	1	8	1	0
	92534	90624		-	-	NGK_0121	Pilin	pilin glycosylation protein	14	0	9	2	9	5	10
	93787	92582		-	-	NGK_0122	Metabolism	protein PglC	57	0	13	51	33	22	6
	95144	93888		-	-	NGK_0123	Metabolism	PglB protein	35	12	43	10	22	4	8
	95300	95145		-	-	NGK_0124	Hypothetical	hypothetical protein	169	0	0	0	41	19	0
	96907	95297		-	-	NGK_0125	Metabolism	Lipopolysaccharide biosynthesis translocase	12	0	23	8	20	19	5
	97998	96913		-	-	NGK_0126	Metabolism	Riboflavin biosynthesis protein RibD	47	0	0	13	18	24	6
	98518	98054		-	nrdR	NGK_0127	Regulator	transcriptional regulator NrdR	223	0	0	7	9	30	78
	99371	98547		-	-	NGK_0128	Hypothetical	hypothetical protein	29	15	32	31	30	10	14
	99625	99476		-	-	NGK_0129	Phage Associated	putative phage associated protein	0	0	0	0	0	0	0
	100088	99933		-	-	NGK_0130	Hypothetical	hypothetical protein	0	0	0	8	34	19	16
	101208	100129		-	aroB	NGK_0131	Metabolism	3-dehydroquinate synthase	36	21	7	26	48	33	12
	101803	101288		-	aroK	NGK_0132	Metabolism	shikimate kinase	12	0	0	9	47	10	11
	101813	101956		+	-	NGK_0133	Hypothetical	hypothetical protein	0	0	0	0	0	0	0
	102239	102403		+	-	NGK_0134	Hypothetical	hypothetical protein	0	0	0	0	0	0	1
	102748	102924		+	-	NGK_0135	Phage Associated	putative phage associated protein	0	0	0	0	13	0	23
	102921	103043		+	-	NGK_0136	Hypothetical	hypothetical protein	0	0	0	0	8	0	0
105263	105263	103068	103033	-	-	NGK_0137	Pilin	PilQ	443	249	245	308	654	942	574
	105749	105282		-	-	NGK_0138	Pilin	PilP protein	279	395	231	690	775	1076	882
	106492	105845	105845	-	-	NGK_0139	Pilin	PilO	705	337	558	616	624	974	523
107092	107092	106493		-	-	NGK_0140	Pilin	PilN	78	191	321	717	338	378	461
	108210	107095		-	-	NGK_0141	Pilin	PilM	370	373	456	978	671	1184	700
108362	108362	110758	110758	+	-	NGK_0142	Metabolism	protein PonA	83	104	15	108	131	118	88
	111508	110879	110879	-	engB	NGK_0143	Translation	ribosome biogenesis GTP-binding protein YsxC	39	127	43	126	46	54	47
	111733	112338	112338	+	-	NGK_0144	Energy Metabolism	putative cytochrome	56	19	86	534	156	215	125
	112616	114568		+	-	NGK_0145	Energy Metabolism	putative cytochrome biogenesis protein	34	0	26	60	72	92	49
	114561	115748		+	-	NGK_0146	Energy Metabolism	putative cytochrome synthesis protein	8	31	0	27	33	31	22
	115864	116928		+	-	NGK_0147	DNA Metabolism	putative DNA-binding/iron metalloprotein/AP endonuclease	30	43	25	68	105	52	81
	117896	116973		-	-	NGK_0148	Metabolism	lipid A biosynthesis lauroyl acyltransferase	56	31	0	56	40	21	18
	117945	118088		+	-	NGK_0149	Hypothetical	hypothetical protein	0	0	0	12	15	14	158
	118212	119381		+	-	NGK_0150	Metabolism	S-adenosylmethionine synthetase	145	115	39	93	72	70	50
	120972	119446		-	-	NGK_0151	Host Interactions	Penicillin-binding protein 3	86	19	0	40	81	35	23
	121014	121586		+	-	NGK_0152	Energy Metabolism	Oxidoreductase	247	289	33	677	152	323	130
	121567	121764		+	-	NGK_0153	Hypothetical	hypothetical protein	41	0	0	11	0	2	0
	121817	121948		+	-	NGK_0154	Hypothetical	hypothetical protein	70	0	0	0	14	2	1
	121964	123277		+	-	NGK_0155	Transport	putative magnesium citrate secondary transporter	3	21	20	8	7	2	21
	123545	124174		+	-	NGK_0156	Regulator	protein BasR	0	0	0	4	13	4	0
	124187	125506		+	-	NGK_0157	Regulator	protein BasS	4	21	0	6	8	1	9
	127034	125541		-	-	NGK_0158	Metabolism	axial filament protein	41	18	0	53	66	41	30
	127015	127149		+	-	NGK_0159	Hypothetical	hypothetical protein	0	0	0	0	0	0	0
	127229	127510		+	-	NGK_0160	Metabolism	putative glutaredoxin	139	459	416	736	849	213	59
127516	127531	127974	127974	+	-	NGK_0161	Transport	preprotein translocase subunit SecB	997	683	414	480	2039	3424	310
	128060	130102		+	-	NGK_0162	DNA Metabolism	ATP-dependent DNA helicase RecG	40	0	37	8	33	14	16
	130627	130442		-	-	NGK_0163	Hypothetical	hypothetical protein	0	0	0	0	0	0	0
	131739	130696		-	argC	NGK_0164	Metabolism	N-acetyl-gamma-glutamyl-phosphate reductase	21	10	0	13	6	9	19
	132017	131736		-	-	NGK_0165	Hypothetical	hypothetical protein	43	0	0	13	4	8	0
	132041	132169		+	-	NGK_0166	Hypothetical	hypothetical protein	0	0	0	0	0	0	0
	132269	133423		+	-	NGK_0167	Hypothetical	hypothetical protein	3	0	0	6	4	5	10
	134327	135340		+	-	NGK_0168	Other	putative secretion protein	0	0	27	30	36	59	50
	135669	135872		+	-	NGK_0169	Hypothetical	hypothetical protein	0	93	11	11	11	10	0
	135886	136101		+	-	NGK_0170	Hypothetical	hypothetical protein	0	0	0	11	24	12	0
	136203	137924		+	-	NGK_0171	Transport	putative protein export protein	3	0	0	4	7	9	2
	138117	138398		+	-	NGK_0172	Transport	putative ABC transporter	0	87	0	2	47	43	33
	139645	138419		-	rbn	NGK_0173	Metabolism	ribonuclease BN/unknown domain fusion protein	41	23	43	48	56	20	33
	139744	139908		+	-	NGK_0174	Hypothetical	hypothetical protein	0	0	159	21	18	28	0
	140134	140793	140793	+	-	NGK_0175	Hypothetical	hypothetical protein	85	0	81	149	70	36	96
140821	140821	141336	141336	+	-	NGK_0176	Hypothetical	hypothetical protein	158	19	0	106	44	62	20
	141424	141858		+	-	NGK_0177	Metabolism	6-pyruvoyl tetrahydrobiopterin synthase	0	50	0	71	107	22	0
	142129	142497		+	-	NGK_0178	Hypothetical	hypothetical protein	12	0	0	24	32	2	0
	142494	143132		+	-	NGK_0179	Hypothetical	hypothetical protein	8	0	0	61	41	12	15
	143558	143677		+	-	NGK_0180	Hypothetical	hypothetical protein	0	0	0	0	0	0	0
	144854	143769		-	-	NGK_0181	Metabolism	beta-hexosaminidase	21	31	0	0	25	13	11
	146380	144911		-	-	NGK_0182	Membrane	membrane protein	42	19	0	23	21	24	25
	146459	146608		+	-	NGK_0183	Hypothetical	hypothetical protein	0	0	0	0	0	0	0
	148133	146634		-	-	NGK_0184	Metabolism	putative serine protease	34	18	0	77	61	40	32
	148933	148271		-	-	NGK_0185	DNA Metabolism	putative endonuclease III	98	82	0	35	34	48	29
	149483	148947		-	-	NGK_0186	Membrane	Membrane protein	0	0	0	0	13	4	0
	149510	149656		+	-	NGK_0187	Hypothetical	hypothetical protein	0	0	0	4	17	16	21
149739	149739	151019	151019	+	-	NGK_0188	Transport	putative sugar transporter	84	53	114	220	142	75	133
	151035	151151		+	-	NGK_0189	Hypothetical	hypothetical protein	126	0	0	13	5	1	9
	151309	152688		+	-	NGK_0190	Transport	NhaC	20	0	0	45	58	128	51
	153655	152831		-	-	NGK_0191	Transport	Magnesium and cobalt transporter	43	19	30	17	60	98	45
	154292	153657		-	-	NGK_0192	Metabolism	Putative metalloprotease NGO0145	68	65	43	49	32	67	21
	154291	155226	155226	+	hemC	NGK_0193	Metabolism	porphobilinogen deaminase	133	36	119	76	318	158	293
	155262	155459		+	-	NGK_0194	Hypothetical	hypothetical protein	0	0	0	4	61	49	64
	155823	155512		-	-	NGK_0195	Transposase	IS1016 transposase	51	0	0	0	0	0	0
156237	156237	156356		+	-	NGK_0196	Hypothetical	hypothetical protein	0	0	69	105	215	23	3
	156378	157058		+	-	NGK_0197	Hypothetical	hypothetical protein	13	0	40	22	28	11	7
	157732	157136		-	-	NGK_0198	Hypothetical	hypothetical protein	25	48	46	3	12	24	0
	157749	157862		+	-	NGK_0199	Hypothetical	hypothetical protein	0	0	0	0	0	0	0
	158374	158159		-	-	NGK_0200	Hypothetical	hypothetical protein	0	0	0	63	4	17	0
	159927	158554		-	-	NGK_0201	Translation	putative ATP-dependent RNA helicase	59	20	11	35	41	55	88
	160139	159951		-	-	NGK_0202	Hypothetical	hypothetical protein	0	0	0	0	0	0	0
	160141	161145		+	-	NGK_0203	Translation	tRNA-dihydrouridine synthase B	49	15	24	13	55	11	56
161244	161244	161573		+	-	NGK_0204	Regulator	DNA-binding protein Fis	0	80	0	25	227	241	356
	161570	162112		+	ruvC	NGK_0205	DNA Metabolism	Holliday junction resolvase	9	0	0	15	21	12	42
	162133	163032		+	-	NGK_0206	Metabolism	lipid A biosynthesis lauroyl acyltransferase	0	0	29	26	45	32	32
	163108	163260		+	-	NGK_0207	Hypothetical	hypothetical protein	0	2	0	18	14	23	30
163635	163635	163820		+	-	NGK_0208	Hypothetical	hypothetical protein	150	447	1114	497	2236	1670	689
163921	163921	164730		+	-	NGK_0209	Hypothetical	hypothetical protein	24	71	33	109	107	108	45
	164711	164872		+	-	NGK_0210	Hypothetical	hypothetical protein	0	0	0	30	3	29	0
	164955	167558		+	pepN	NGK_0211	Metabolism	aminopeptidase	45	28	20	36	54	25	31
	167620	168273		+	-	NGK_0212	Transposase	IS1016 transposase	23	0	37	3	23	0	3
	168598	168407		-	-	NGK_0213	Hypothetical	hypothetical protein	60	122	0	19	16	5	11
	169097	168618		-	-	NGK_0214	Hypothetical	hypothetical protein	0	0	0	10	4	1	0
	169492	169154		-	-	NGK_0215	Hypothetical	hypothetical protein	0	0	67	45	2	12	54
	169725	169537		-	-	NGK_0216	Hypothetical	hypothetical protein	34	0	135	13	12	66	0
	170292	169972		-	-	NGK_0217	Hypothetical	hypothetical protein	15	0	0	17	10	14	0
	170858	170319		-	-	NGK_0218	Hypothetical	hypothetical protein	8	53	50	6	33	38	33
	171686	170901		-	-	NGK_0219	Hypothetical	hypothetical protein	0	0	0	0	3	0	3
172901	172901	171987	171987	-	-	NGK_0220	Membrane	periplasmic binding protein MntC	52	94	98	228	70	99	21
	173853	172978		-	-	NGK_0221	Membrane	membrane protein	22	0	22	25	35	11	19
	174643	173888		-	-	NGK_0222	Transport	ABC transporter ATP-binding protein	118	0	3	78	38	51	31
175313	175299	174934	174934	-	rplS	NGK_0223	Translation	50S ribosomal protein L19	625	489	428	1118	2289	1115	1413
	176063	175314	175314	-	trmD	NGK_0224	Translation	tRNA (guanine-N(1)-)-methyltransferase	56	22	195	394	405	251	507
176580	176545	176063		-	rimM	NGK_0225	Translation	16S rRNA-processing protein RimM	546	596	566	712	1182	1057	898
176842	176833	176588	176588	-	rpsP	NGK_0226	Translation	30S ribosomal protein S16	1219	620	577	1260	1806	1232	1319
	177132	176878		-	-	NGK_0227	Hypothetical	hypothetical protein	0	0	0	0	0	8	0
	177581	177174		-	-	NGK_0228	Hypothetical	hypothetical protein	34	0	0	0	0	0	0
	179301	177922		-	-	NGK_0229	Hypothetical	hypothetical protein	28	0	0	0	8	3	0
	180825	179419		-	-	NGK_0230	Regulator	putative two-component system sensor kinase	39	53	71	26	68	76	31
181515	181515	180838	180838	-	-	NGK_0231	Regulator	putative two-component system regulator	848	339	267	443	470	528	236
	183519	181591		-	-	NGK_0232	Hypothetical	hypothetical protein	23	7	0	5	14	9	7
	183862	183509		-	-	NGK_0233	Hypothetical	hypothetical protein	0	0	0	10	21	10	0
	184518	183871		-	-	NGK_0234	Replication	Maf-like protein	38	0	0	34	20	17	3
	185293	184523		-	-	NGK_0235	Transport	Sec-independent protein translocase component	0	33	0	29	45	23	26
185995	185992	185306	185306	-	-	NGK_0236	Transport	Sec-independent protein translocase protein tatB-like protein	530	91	156	333	294	94	111
186199	186199	185996	185996	-	tatA	NGK_0237	Amino Acid Metabolism	twin arginine translocase protein A	408	101	138	1184	1241	643	841
	186599	186246		-	-	NGK_0238	Metabolism	HitA protein	266	0	77	340	152	178	105
	187095	186643		-	hisE	NGK_0239	Metabolism	phosphoribosyl-ATP pyrophosphatase	53	0	0	93	62	61	44
188171	188171	187107	187107	-	-	NGK_0240	Metabolism	putative zinc-binding alcohol dehydrogenase	686	401	505	517	744	366	211
	188894	188445		-	-	NGK_0241	Transposase	IS1106 transposase	0	0	39	52	0	3	0
	188997	189215		+	-	NGK_0242	Hypothetical	hypothetical protein	0	0	0	0	10	0	0
	189561	190523		+	-	NGK_0243	Hypothetical	hypothetical protein	6	29	28	32	22	42	57
	190689	190889		+	-	NGK_0244	Hypothetical	hypothetical protein	0	0	0	0	7	0	0
	191819	191067		-	-	NGK_0245	Hypothetical	hypothetical protein	0	0	0	3	9	6	15
	193643	191919		-	-	NGK_0246	Metabolism	Rsp	15	0	40	5	15	9	4
	195966	193663		-	-	NGK_0247	DNA Metabolism	DNA topoisomerase IV subunit A	15	3	10	43	31	19	21
	196115	196798	196798	+	gpmA	NGK_0248	Metabolism	phosphoglyceromutase	14	0	40	131	106	149	81
	196815	196958		+	-	NGK_0249	Hypothetical	hypothetical protein	0	0	0	1	10	10	0
	198428	197844		-	-	NGK_0250	Transposase	IS1016 transposase	52	0	30	10	27	14	31
	201854	199230		-	alaS	NGK_0251	Metabolism	alanyl-tRNA synthetase	73	63	38	42	75	83	51
	201886	202020		+	-	NGK_0252	Hypothetical	hypothetical protein	0	0	0	0	0	0	0
	202058	203188		+	-	NGK_0253	Transport	Spermidine/putrescine ABC transporter, periplasmic spermidine/putrescine-binding protein	13	25	0	59	58	82	26
204270	204270	204767	204767	+	-	NGK_0254	Hypothetical	hypothetical protein	260	110	206	747	876	561	891
	204131	203229		-	-	NGK_0255	Hypothetical	hypothetical protein	51	0	30	15	25	21	15
	205734	204829	204829	-	-	NGK_0256	Host Interactions	protein MtrA	67	31	0	167	103	83	41
	205863	206198	206198	+	-	NGK_0257	Hypothetical	hypothetical protein	393	16	0	83	270	390	258
	206216	206332		+	-	NGK_0258	Hypothetical	hypothetical protein	0	0	0	0	0	0	49
	206329	206799		+	-	NGK_0259	Hypothetical	hypothetical protein	0	0	0	5	14	16	1
	206905	207468		+	-	NGK_0260	Metabolism	protein PgsA	53	32	0	82	27	62	12
	208165	209271		+	-	NGK_0261	Membrane	putative periplasmic protease	63	0	48	98	146	176	191
	210176	209322		-	-	NGK_0262	Membrane	membrane protein	8	0	0	1	23	12	0
	210618	210187		-	-	NGK_0263	Regulator	putative MarR-family transcriptional regulator	9	0	63	0	19	29	23
	211722	210853		-	-	NGK_0264	Metabolism	3-hydroxyacid dehydrogenase	139	16	15	61	146	118	52
	212532	211798		-	hisB	NGK_0265	Metabolism	imidazoleglycerol-phosphate dehydratase	346	58	27	50	111	186	21
	213805	212726		-	-	NGK_0266	Metabolism	histidinol-phosphate aminotransferase	167	8	0	32	51	68	34
	215140	213851		-	hisD	NGK_0267	Metabolism	histidinol dehydrogenase	115	38	13	79	106	144	58
216024	216024	215137		-	-	NGK_0268	Hypothetical	hypothetical protein	118	29	30	155	161	191	24
216859	216850	216116	216116	-	hisG	NGK_0269	Translation	ATP phosphoribosyltransferase	465	231	143	229	345	290	146
	217513	216860		-	-	NGK_0270	Lipoprotein	Lipoprotein	392	229	144	601	373	179	157
	217759	217592		-	-	NGK_0271	Hypothetical	hypothetical protein	0	0	0	2	15	47	14
217907	217907	218023		+	-	NGK_0272	Hypothetical	hypothetical protein	50	0	0	16	270	96	84
	218567	220294		+	-	NGK_0273	Metabolism	IlvI	135	46	54	317	150	150	98
220305	220305	220796	220796	+	ilvH	NGK_0274	Metabolism	acetolactate synthase 3 regulatory subunit	70	0	0	218	59	60	26
	220818	221156		+	-	NGK_0275	Hypothetical	hypothetical protein	30	0	78	421	139	119	113
	221140	222249		+	-	NGK_0276	Metabolism	ketol-acid reductoisomerase	157	287	193	335	407	276	184
	223363	222368		-	-	NGK_0277	Metabolism	ornithine carbamoyltransferase	0	52	27	14	141	66	113
	226090	223505	223505	-	-	NGK_0278	Metabolism	bifunctional aconitate hydratase 2/2-methylisocitrate dehydratase	236	65	119	243	391	241	229
	226399	226238		-	-	NGK_0279	Hypothetical	hypothetical protein	32	0	0	18	11	10	22
	227474	226404		-	-	NGK_0280	Hypothetical	hypothetical protein	0	0	0	10	28	13	11
	228586	227471		-	-	NGK_0281	Hypothetical	hypothetical protein	12	25	44	13	45	29	17
228575	228575	228757		+	-	NGK_0282	Hypothetical	hypothetical protein	49	54	0	121	86	61	63
228760	228760	230166	230166	+	-	NGK_0283	Amino Acid Metabolism	AmpA	223	52	56	111	215	215	194
	230169	230669		+	-	NGK_0284	DNA Metabolism	HolC protein	60	99	0	55	146	152	122
	230929	231747		+	-	NGK_0285	Metabolism	putative peptidyl-prolylisomerase	203	43	103	267	216	413	153
	231758	232480		+	-	NGK_0286	Metabolism	putative phosphoribosylglycinamidetransformylase	62	0	76	24	74	77	27
	232496	233167		+	-	NGK_0287	Hypothetical	hypothetical protein	97	0	39	27	34	36	31
	233246	233707		+	-	NGK_0288	Hypothetical	hypothetical protein	135	0	0	97	109	46	23
	234230	234946		+	-	NGK_0289	Regulator	GntR family transcriptional regulator	6	0	14	88	128	52	37
	234943	235098		+	-	NGK_0290	Hypothetical	hypothetical protein	0	0	0	0	5	10	0
	235095	235997		+	-	NGK_0291	Hypothetical	hypothetical protein	37	0	71	11	86	34	42
	236040	236723		+	-	NGK_0292	Regulator	DeoR family transcriptional regulator	34	26	37	74	73	53	17
	236798	236917		+	-	NGK_0293	Other	Sensor protein	49	0	0	9	21	19	34
	236893	238614		+	-	NGK_0294	Metabolism	glutaminyl-tRNA synthetase	45	0	59	50	73	73	18
	238706	239662		+	-	NGK_0295	Metabolism	glutathione synthetase	62	42	0	44	89	113	50
	239821	240204		+	-	NGK_0296	Regulator	protein DagK	0	0	0	23	109	87	105
	240336	240809		+	-	NGK_0297	Hypothetical	hypothetical protein	352	106	100	1140	239	385	160
	240886	242037		+	mnmA	NGK_0298	Translation	tRNA-specific 2-thiouridylase MnmA	5	46	32	94	102	83	91
	242108	243778		+	-	NGK_0299	Metabolism	putative long-chain-fatty-acid--CoA-ligase	23	25	12	21	29	35	25
	243765	243893		+	-	NGK_0300	Hypothetical	hypothetical protein	0	0	0	3	17	28	29
	243890	245524		+	pyrG	NGK_0301	Metabolism	CTP synthetase	90	38	39	81	154	94	145
	245678	245532		-	-	NGK_0302	Hypothetical	hypothetical protein	0	0	0	0	3	3	16
	245666	246319		+	-	NGK_0303	Transposase	IS1016 transposase	29	28	0	4	11	3	17
	246619	246476		-	-	NGK_0304	Hypothetical	hypothetical protein	31	0	0	0	29	8	0
	246684	246815		+	-	NGK_0305	Hypothetical	hypothetical protein	0	0	0	0	29	5	76
	246498	246316		-	-	NGK_0306	Hypothetical	hypothetical protein	0	0	0	0	14	10	0
	247945	246812		-	-	NGK_0307	DNA Metabolism	DNA cytosine methyltransferase M.NgoMIII	8	0	0	0	101	131	83
	248590	247949		-	-	NGK_0308	DNA Metabolism	restriction endonuclease R.NgoMIII	30	0	0	0	61	55	127
	251610	248608		-	uvrA	NGK_0309	DNA Metabolism	excinuclease ABC subunit A	19	0	17	15	30	16	10
	251611	252390		+	-	NGK_0310	Metabolism	phosphatidylserine decarboxylase	53	0	0	50	77	68	72
	252830	252958		+	-	NGK_0311	Hypothetical	hypothetical protein	0	0	0	13	29	37	42
	255224	252930		-	-	NGK_0312	Iron	putative TonB-dependent receptor protein	35	11	35	89	51	33	14
	255617	256207		+	-	NGK_0313	Metabolism	anthranilate synthase component II	86	48	46	261	101	74	64
	256253	257299		+	trpD	NGK_0314	Metabolism	anthranilate phosphoribosyltransferase	37	0	26	76	46	26	23
	257962	257513		-	-	NGK_0315	Transposase	IS1106 transposase	0	50	57	41	4	5	0
	259224	258106		-	-	NGK_0316	DNA Metabolism	Histone deacetylase family protein	30	0	17	18	15	5	1
	259355	259621		+	-	NGK_0317	Hypothetical	hypothetical protein	223	202	260	373	223	217	270
259830	259830	261686		+	secD	NGK_0318	Transport	preprotein translocase subunit SecD	114	22	98	115	145	112	137
261690	261690	262625	262625	+	secF	NGK_0319	Transport	preprotein translocase subunit SecF	92	24	87	75	164	125	164
262823	262830	263099	263099	+	rpsO	NGK_0320	Translation	30S ribosomal protein S15	1474	208	1351	1648	2736	6141	8743
	263241	263447		+	-	NGK_0321	Transport	Spermidine/putrescine ABC transporter, ATP-binding protein	24	0	0	99	43	54	57
	263473	264501		+	-	NGK_0322	Transport	Spermidine/putrescine ABC transporter, ATP-binding protein	48	23	29	134	106	128	110
	264517	265482		+	-	NGK_0323	Transport	Spermidine/putrescine ABC transporter, permease protein	14	109	45	94	174	124	168
	265482	266369		+	-	NGK_0324	Transport	Spermidine/putrescine ABC transporter, permease protein	47	61	0	80	195	166	358
	266496	267791		+	-	NGK_0325	Energy Metabolism	putative oxidoreductase	0	0	1	12	11	14	18
	269351	267885		-	-	NGK_0326	Transport	putative transporter, ammonium	50	0	24	26	80	35	97
	269652	269524		-	-	NGK_0327	Hypothetical	hypothetical protein	0	0	0	0	5	0	0
271063	271063	269804		-	rho	NGK_0328	Transcription	transcription termination factor Rho	203	46	78	112	123	194	132
	271137	271283		+	-	NGK_0329	Hypothetical	hypothetical protein	0	0	0	0	19	6	0
273685	273668	271284	271284	-	-	NGK_0330	Metabolism	phosphoenolpyruvate synthase	492	364	172	501	541	250	349
	273673	273936		+	-	NGK_0331	Metabolism	Myo-inositol transport system permease	0	0	0	4	0	11	0
	274023	274676		+	-	NGK_0332	Transposase	IS1016 transposase	37	0	0	5	11	7	4
	274802	275623		+	-	NGK_0333	Hypothetical	hypothetical protein	6	19	0	45	46	52	49
	276419	275709		-	-	NGK_0334	Metabolism	putative phosphatase	27	0	33	19	3	20	40
	277236	276409		-	-	NGK_0335	Hypothetical	hypothetical protein	10	0	0	10	11	11	30
	277472	278242		+	-	NGK_0336	Lipoprotein	LolA protein	72	0	0	40	15	12	11
	278423	278295		-	-	NGK_0337	Hypothetical	hypothetical protein	0	0	0	0	0	0	0
	278455	279654		+	-	NGK_0338	Transport	Spermidine/putrescine ABC transporter, periplasmic spermidine/putrescine-binding protein	187	64	16	104	136	96	81
	280023	280781		+	-	NGK_0339	Metabolism	putative sugar transferase	35	32	0	79	91	163	112
280796	280822	281352	281352	+	-	NGK_0340	Hypothetical	hypothetical protein	606	71	0	180	148	159	69
	283115	281520		-	prfC	NGK_0341	Membrane	peptide chain release factor 3	41	17	33	42	51	49	27
	283617	283222		-	hisI	NGK_0342	Metabolism	phosphoribosyl-AMP cyclohydrolase	31	74	0	1	20	21	23
	284415	283648		-	-	NGK_0343	Metabolism	imidazole glycerol phosphate synthase subunit HisF	8	0	31	3	26	20	23
	285836	285198		-	hisH	NGK_0344	Metabolism	imidazole glycerol phosphate synthase subunit HisH	0	0	0	31	59	28	59
	285165	284428		-	-	NGK_0345	Metabolism	1-(5-phosphoribosyl)-5-[(5-phosphoribosylamino)methylideneamino] imidazole-4-carboxamide isomerase	54	23	0	19	32	72	7
	287484	287621		+	-	NGK_0346	Hypothetical	hypothetical protein	0	0	0	0	0	0	0
	287468	285966		-	-	NGK_0347	Metabolism	putative phosphotransacetylase	106	106	0	105	155	152	108
	288711	287653		-	fbpC	NGK_0348	Iron	Fe(3+) ions import ATP-binding protein fbpC	43	53	52	11	19	2	4
	290261	288732		-	fbpB	NGK_0349	Transport	ABC transporter permease	31	43	53	22	29	18	8
291312	291312	290317	290317	-	fbpA	NGK_0350	Iron	Major ferric iron-binding protein	521	336	449	320	98	128	132
	291438	291698		+		NGK_0351	Amino Acid Metabolism	Twin-arginine translocation pathway signal	0	0	0	0	0	0	0
	292044	291703		-	-	NGK_0352	Hypothetical	hypothetical protein	20	0	6	31	77	67	46
	292410	292102		-	-	NGK_0353	Metabolism	argininosuccinate lyase	63	0	0	11	74	56	32
	293477	292395		-	-	NGK_0354	Metabolism	argininosuccinate lyase	72	99	92	36	79	52	77
	294365	293496		-	-	NGK_0355	Metabolism	UTP-glucose-1-phosphate uridylyltransferase	160	13	29	76	98	132	64
	294992	294393		-	-	NGK_0356	Metabolism	putative deoxyribonucleotide triphosphate pyrophosphatase	51	0	4	22	22	22	21
	295218	294985		-	-	NGK_0357	Hypothetical	hypothetical protein	203	0	234	21	94	49	4
295907	295907	295326		-	-	NGK_0358	Metabolism	inorganic pyrophosphatase	301	288	303	462	815	685	505
	296419	295961		-	ntpA	NGK_0359	Metabolism	dATP pyrophosphohydrolase	0	0	0	0	23	16	6
296969	296969	298855		+	-	NGK_0360	Replication	MafB1 protein	31	14	29	121	88	71	79
	300424	300540		+	-	NGK_0361	Hypothetical	hypothetical protein	0	0	0	0	30	43	149
	302037	300580		-	-	NGK_0362	Transport	putative transport protein, potassium	18	0	0	1	10	2	6
	302882	302052		-	apaH	NGK_0363	Metabolism	diadenosine tetraphosphatase	106	34	0	13	37	32	35
	303348	302959		-	-	NGK_0364	Metabolism	Ribonuclease, putative	102	0	70	81	52	27	9
	304022	303495		-	-	NGK_0365	Membrane	outer membrane protein	41	55	52	132	67	64	72
	304124	304327		+	-	NGK_0366	Membrane	Periplasmic binding protein	0	0	0	0	0	0	14
	304477	304319		-	-	NGK_0367	Metabolism	Beta-glucosidase	0	0	0	0	0	10	0
	305640	304465		-	-	NGK_0368	Metabolism	coproporphyrinogen III oxidase	0	24	0	1	11	11	0
	308168	305697		-	-	NGK_0369	DNA Metabolism	putative DNA ligase	33	8	2	4	23	12	9
	309597	308302	308302	-	-	NGK_0370	Hypothetical	hypothetical protein	152	18	104	136	151	113	98
	310354	309782		-	-	NGK_0371	Metabolism	N-acetyl-anhydromuranmyl-L-alanine amidase	0	0	45	44	26	22	31
	310438	311433		+	-	NGK_0372	Membrane	Periplasmic protein	47	20	0	28	38	40	39
	311493	312113		+	tmk	NGK_0373	Metabolism	thymidylate kinase	56	0	0	25	32	26	89
	312335	313615	313615	+	-	NGK_0374	Metabolism	Malate oxidoreductase	139	157	92	124	152	138	138
	313770	313931		+	-	NGK_0375	Hypothetical	hypothetical protein	43	0	0	51	12	5	0
	313978	315048		+	lpxK	NGK_0376	Metabolism	tetraacyldisaccharide 4'-kinase	44	22	35	11	33	7	26
	315248	315787	315787	+	-	NGK_0377	Membrane	Periplasmic protein	0	0	50	254	153	132	59
316009	316009	316191		+	-	NGK_0378	Hypothetical	hypothetical protein	745	74	83	603	634	253	644
	316188	316949	316949	+	-	NGK_0379	Metabolism	3-deoxy-manno-octulosonate cytidylyltransferase	240	67	31	110	200	73	200
	316972	317268		+	-	NGK_0380	Hypothetical	hypothetical protein	105	0	0	100	30	40	7
	317290	317487		+	-	NGK_0381	Hypothetical	hypothetical protein	0	0	0	0	59	12	49
	317465	317581		+	-	NGK_0382	Hypothetical	hypothetical protein	0	0	0	6	11	0	0
	317968	318795	318795	+	trpA	NGK_0383	Amino Acid Metabolism	tryptophan synthase subunit alpha	66	63	86	379	193	170	213
	318832	319704	319704	+	-	NGK_0384	Metabolism	acetyl-CoA carboxylase subunit beta	65	32	59	136	102	94	100
	320375	319764		-	-	NGK_0385	Hypothetical	hypothetical protein	8	57	0	55	20	15	18
	320483	320707	320707	+	-	NGK_0386	Hypothetical	hypothetical protein	135	242	0	173	90	80	61
	320905	320741		-	-	NGK_0387	Hypothetical	hypothetical protein	118	0	0	7	94	23	18
	320975	321124		+	-	NGK_0388	Lipoprotein	Lipoprotein	69	0	0	0	38	52	0
	321805	321125		-	-	NGK_0389	Hypothetical	hypothetical protein	0	0	0	8	32	2	2
	321946	321827		-	-	NGK_0390	Hypothetical	hypothetical protein	0	0	0	85	149	66	14
	322167	322367		+	-	NGK_0391	Lipoprotein	putative lipoprotein	31	0	0	0	9	18	0
	322428	323462		+	-	NGK_0392	Metabolism	dihydroorotase	0	0	0	0	3	0	10
	323966	323541		-	nusB	NGK_0393	Transcription	transcription antitermination protein NusB	40	0	0	48	26	25	48
	324520	324044	324044	-	ribH	NGK_0394	Metabolism	6,7-dimethyl-8-ribityllumazine synthase	219	117	278	89	138	233	166
	324890	324567		-	-	NGK_0395	Hypothetical	hypothetical protein	96	0	122	40	53	73	43
	325030	324887		-	-	NGK_0396	Hypothetical	hypothetical protein	0	0	0	13	0	10	0
	325058	325777		+	rnc	NGK_0397	Metabolism	ribonuclease III	10	0	0	13	42	44	38
	325806	326747		+	era	NGK_0398	Metabolism	GTP-binding protein Era	20	30	22	34	62	25	27
	326900	327064		+	-	NGK_0399	Iron	lactoferrin binding protein B	0	0	0	0	0	0	0
	327103	329088		+	lbpB	NGK_0400	Iron	lactoferrin binding protein B	74	0	13	0	46	57	71
	329085	331916		+	lbpA	NGK_0401	Iron	lactoferrin receptor	24	9	0	3	26	41	25
	331937	332062		+	-	NGK_0402	Hypothetical	hypothetical protein	40	0	0	0	62	9	0
	333016	332390		-	-	NGK_0403	Metabolism	N-(5'-phosphoribosyl)anthranilate isomerase	0	0	0	1	7	1	21
	333566	333075		-	greB	NGK_0404	Transcription	transcription elongation factor GreB	0	0	0	22	20	16	4
	335210	333666		-	-	NGK_0405	Metabolism	amidophosphoribosyltransferase	58	7	17	66	93	65	28
	335394	335233		-	-	NGK_0406	Hypothetical	hypothetical protein	69	0	21	39	33	14	37
	335901	335404		-	-	NGK_0407	Metabolism	putative bacteriocin production protein	79	0	82	34	59	38	52
	336934	335894		-	-	NGK_0408	Hypothetical	hypothetical protein	40	6	26	72	69	73	64
	338222	336948		-	-	NGK_0409	Metabolism	FolC protein	113	15	61	76	88	85	94
	338693	338253		-	-	NGK_0410	Metabolism	folI protein	108	0	0	86	185	54	144
	339057	338698		-	-	NGK_0411	Hypothetical	hypothetical protein	101	67	196	152	77	204	75
	339858	339130	339130	-	-	NGK_0412	Transport	amino acid permease	99	78	28	195	125	94	91
	340469	339900	339900	-	-	NGK_0413	Hypothetical	hypothetical protein	91	50	0	108	130	185	112
	341035	340466		-	-	NGK_0414	Hypothetical	hypothetical protein	18	0	26	91	135	71	99
	341829	341050		-	ksgA	NGK_0415	Metabolism	dimethyladenosine transferase	120	83	125	218	129	113	112
	342137	341973		-	-	NGK_0416	Hypothetical	hypothetical protein	21	43	41	17	24	6	6
	342150	342734		+	-	NGK_0417	Hypothetical	hypothetical protein	0	0	0	7	0	0	0
	342817	344019	344019	+	-	NGK_0418	Amino Acid Metabolism	tryptophan synthase subunit beta	41	17	0	111	68	29	52
348876	348876	344095	344095	-	-	NGK_0419	Metabolism	IgA-specific metalloendopeptidase	90	33	30	160	107	131	95
	349178	349032		-	-	NGK_0420	Hypothetical	hypothetical protein	0	0	0	0	0	0	0
	349202	351481		+	-	NGK_0421	Transport	ComA protein	6	0	6	11	8	3	3
352354	352354	351551	351551	-	-	NGK_0422	Transport	ComL, competence lipoprotein	432	35	195	389	369	352	391
	352353	353477		+	-	NGK_0423	Translation	protein RluD	33	3	0	22	24	40	23
	353484	353633		+	-	NGK_0424	Hypothetical	hypothetical protein	0	77	0	17	9	0	0
	354448	353630		-	-	NGK_0425	Transport	transporter	37	26	67	6	40	7	37
	354483	354629		+	-	NGK_0426	Hypothetical	hypothetical protein	0	0	0	1	10	0	0
	355013	354654		-	-	NGK_0427	Hypothetical	hypothetical protein	0	0	0	0	0	0	0
	355031	355810		+	-	NGK_0428	Hypothetical	hypothetical protein	55	0	0	24	28	2	31
	355863	356342		+	-	NGK_0429	Lipoprotein	Rare lipoprotein B, putative	9	0	0	66	47	30	35
	356344	357342		+	holA	NGK_0430	Replication	DNA polymerase III subunit delta	33	0	80	74	105	41	34
	357463	357882	357882	+	-	NGK_0431	Hypothetical	hypothetical protein	19	42	0	117	148	113	77
	357907	358473		+	-	NGK_0432	Membrane	Membrane protein	42	0	59	54	57	72	100
	359448	358564		-	-	NGK_0433	Hypothetical	hypothetical protein	17	0	31	171	129	72	56
	359650	359486		-	-	NGK_0434	Hypothetical	hypothetical protein	0	0	0	0	5	21	0
	359976	360122		+	-	NGK_0435	Hypothetical	hypothetical protein	0	0	0	0	0	0	0
361053	361053	360181	360181	-	-	NGK_0436	Transcription	RNA polymerase factor sigma-32	394	240	298	158	1040	976	915
	362846	361308		-	lnt	NGK_0437	Metabolism	apolipoprotein N-acyltransferase	7	0	0	5	12	7	12
	363679	362915		-	-	NGK_0438	Hypothetical	hypothetical protein	36	26	0	24	89	56	48
	363850	365580		+	-	NGK_0439	Transport	potassium/proton antiporter	110	68	46	90	73	68	111
	366131	365577		-	-	NGK_0440	Hypothetical	hypothetical protein	13	0	49	31	7	16	0
	367317	366235		-	hemH	NGK_0441	Transport	ferrochelatase	61	0	0	14	23	13	6
368442	368442	367327	367327	-	tgt	NGK_0442	Metabolism	queuine tRNA-ribosyltransferase	5	21	22	134	81	113	58
	368717	370663		+	thrS	NGK_0443	Translation	threonyl-tRNA synthetase	94	50	161	151	502	498	407
	370798	371202	371202	+	-	NGK_0444	Translation	translation initiation factor 3	0	130	104	80	261	328	352
	371268	371546	371546	+	-	NGK_0445	Translation	50S ribosomal protein L35	236	2	51	920	554	684	719
	371559	371918	371918	+	rplT	NGK_0446	Translation	50S ribosomal protein L20	198	556	816	1395	1133	986	1464
371963	371963	372082		+	-	NGK_0447	Hypothetical	hypothetical protein	0	0	111	236	521	88	352
372093	372093	373148		+	pheS	NGK_0448	Translation	phenylalanyl-tRNA synthetase subunit alpha	9	0	4	158	212	205	141
373165	373165	373578		+	-	NGK_0449	DNA Metabolism	putative very-short-patch-repair endonuclease	0	0	0	139	45	46	69
373580	373580	373918		+	-	NGK_0450	Metabolism	methylase	45	0	81	206	95	132	102
	373896	374177	374177	+	-	NGK_0451	Hypothetical	hypothetical protein	21	0	0	503	782	517	651
	374183	374932		+	-	NGK_0452	Hypothetical	hypothetical protein	11	38	36	225	102	124	122
	375023	377386		+	pheT	NGK_0453	Translation	phenylalanyl-tRNA synthetase subunit beta	69	0	69	104	127	120	127
	377460	377762		+	ihfA	NGK_0454	Regulator	integration host factor subunit alpha	15	15	13	426	320	196	161
	377746	378054		+	-	NGK_0455	Hypothetical	hypothetical protein	129	185	233	590	559	365	698
	378230	378715		+	fxsA	NGK_0456	DNA Metabolism	FxsA protein	0	0	0	11	35	18	9
	379349	380650		+	-	NGK_0457	Metabolism	adenosylmethionine-8-amino-7-oxononanoate aminotransferase	57	0	41	34	24	24	36
	380647	381294		+	bioD	NGK_0458	Metabolism	dithiobiotin synthetase	61	0	0	35	23	20	15
	381309	381785		+	-	NGK_0459	Hypothetical	hypothetical protein	0	0	0	22	12	21	35
	382306	383196		+	ubiA	NGK_0460	Metabolism	4-hydroxybenzoate octaprenyltransferase	32	0	0	92	39	46	48
	383381	383830		+	-	NGK_0461	Regulator	PTS system, nitrogen regulatory IIA protein	0	0	58	79	56	53	73
	383834	384796		+	-	NGK_0462	Metabolism	HPr kinase/phosphorylase	116	0	28	153	191	87	235
	384777	385631		+	-	NGK_0463	Hypothetical	hypothetical protein	155	63	0	105	169	77	104
	385776	385645		-	-	NGK_0464	Hypothetical	hypothetical protein	0	0	0	0	0	0	0
	385787	386653		+	rbgA	NGK_0465	Translation	ribosomal biogenesis GTPase	12	0	31	30	45	25	27
	386754	387356		+	-	NGK_0466	Replication	Segregation and condensation protein B	10	0	90	27	27	37	54
	387558	389213		+	-	NGK_0467	DNA Metabolism	RecN	65	12	47	95	124	92	114
	389875	390024		+	-	NGK_0468	Hypothetical	hypothetical protein	0	0	0	0	5	15	0
	391640	390021		-	-	NGK_0469	Hypothetical	hypothetical protein	9	15	0	3	3	0	0
	391736	392128		+	-	NGK_0470	Hypothetical	hypothetical protein	114	0	0	57	92	146	137
	392171	392908		+	ubiE	NGK_0471	Metabolism	ubiquinone/menaquinone biosynthesis methyltransferase	52	39	74	34	93	39	82
393128	393128	393607	393607	+	-	NGK_0472	Hypothetical	hypothetical protein	1085	1142	1554	1737	339	465	371
393618	393618	393749	393749	+	-	NGK_0473	Hypothetical	hypothetical protein	349	13346	24294	1537	12	11	0
	394229	393735		-	-	NGK_0474	Metabolism	HppK protein	9	0	0	47	23	35	7
	394613	394239		-	-	NGK_0475	Regulator	Regulator	0	0	0	34	9	11	0
	394843	394667		-	-	NGK_0476	Hypothetical	hypothetical protein	0	0	0	1	0	13	0
	395227	394874		-	-	NGK_0477	Hypothetical	hypothetical protein	181	0	111	86	76	30	45
395732	395732	395601	395601	-	-	NGK_0478	Hypothetical	hypothetical protein	0	310	49	510	425	630	763
	395593	395318	395318	-	-	NGK_0479	Hypothetical	hypothetical protein	354	528	608	980	1368	2516	1323
	396678	395740		-	-	NGK_0480	Metabolism	putative D-alanyl-D-alanine-endopeptidase	149	0	0	39	72	71	32
	396999	397439		+	-	NGK_0481	Iron	Bacterioferritin comigratory protein	129	47	62	237	122	81	39
	397491	398366		+	-	NGK_0482	Amino Acid Metabolism	XerD protein	35	13	0	57	50	14	40
	398538	398738	398738	+	-	NGK_0483	Energy Metabolism	putative ferredoxin	61	142	132	101	218	202	40
	398847	398722		-	-	NGK_0484	Hypothetical	hypothetical protein	0	0	0	8	24	45	59
	398874	399137		+	-	NGK_0485	Energy Metabolism	Thioredoxin	0	0	0	29	11	3	13
	400359	399508		-	-	NGK_0486	Energy Metabolism	putative reductase	76	86	87	58	41	65	5
400468	400468	401427	401427	+	-	NGK_0487	Metabolism	phosphoribosylaminoimidazole-succinocarboxamide synthase	79	79	0	216	102	96	77
	401459	401674		+	-	NGK_0488	Hypothetical	hypothetical protein	43	121	485	96	139	275	60
	401664	403784	403784	+	-	NGK_0489	Metabolism	polynucleotide phosphorylase	111	65	149	107	238	229	250
	404525	403857		-	-	NGK_0490	Hypothetical	hypothetical protein	7	0	42	30	15	16	12
	404836	404522		-	-	NGK_0491	Hypothetical	hypothetical protein	13	0	0	33	6	32	0
	404973	405824		+	dapF	NGK_0492	Metabolism	diaminopimelate epimerase	31	33	19	65	83	34	25
	405821	406426		+	-	NGK_0493	Membrane	membrane protein	0	0	0	6	25	20	31
	406622	407554		+	-	NGK_0494	Metabolism	cysteine synthase	235	239	286	391	448	473	683
	407612	407959		+	-	NGK_0495	Hypothetical	hypothetical protein	14	33	53	45	12	11	25
	407938	408558		+	-	NGK_0496	Membrane	putative integral membrane protein	23	37	0	19	25	14	16
	408552	408770		+	-	NGK_0497	Membrane	putative integral membrane protein	4	0	0	20	25	16	0
	408816	408965		+	-	NGK_0498	Hypothetical	hypothetical protein	0	0	0	7	2	4	17
	409028	409201		+	-	NGK_0499	Hypothetical	hypothetical protein	0	0	0	20	11	1	0
	410405	409401		-	-	NGK_0500	Hypothetical	hypothetical protein	11	13	0	35	112	60	65
	412359	410566		-	-	NGK_0501	Metabolism	GTP-binding protein LepA	116	113	37	79	84	143	135
	413313	412501		-	-	NGK_0502	Metabolism	putative nucleoside phosphorylase	6	0	0	25	31	41	2
413341	413370	414500	414507	+	-	NGK_0503	Pilin	Twitching motility protein	560	306	184	459	439	374	353
	414534	415511	415511	+	-	NGK_0504	Replication	DNA polymerase III subunit delta'	122	52	56	156	217	142	253
	415515	415865		+	-	NGK_0505	Pilin	putative type 4 pilus biogenesis protein	173	72	54	228	402	342	567
415870	415870	416649		+	-	NGK_0506	DNA Metabolism	Mg-dependent DNase	106	178	0	133	236	282	213
	416910	416686		-	-	NGK_0507	Hypothetical	hypothetical protein	0	0	0	0	0	0	0
	416991	417302		+	-	NGK_0508	Energy Metabolism	protein GrlA	197	279	229	383	267	223	392
	417302	417418		+	-	NGK_0509	Hypothetical	hypothetical protein	114	71	156	77	17	9	61
	417408	418034		+	upp	NGK_0510	DNA Metabolism	uracil phosphoribosyltransferase	145	45	42	113	137	95	182
	418057	418377		+	-	NGK_0511	Hypothetical	hypothetical protein	65	0	0	80	26	135	188
	418546	419193		+	-	NGK_0512	Hypothetical	hypothetical protein	67	44	42	90	96	116	157
	419217	420041		+	-	NGK_0513	Hypothetical	hypothetical protein	37	0	16	80	156	152	133
	420041	421009		+	-	NGK_0514	Hypothetical	hypothetical protein	0	0	0	48	50	75	26
	421288	421713		+	-	NGK_0515	Hypothetical	hypothetical protein	0	0	0	102	151	57	136
	421731	422495		+	hemD	NGK_0516	Metabolism	uroporphyrinogen-III synthase	0	0	0	37	68	49	33
	422507	423841		+	-	NGK_0517	Metabolism	uroporphyrin-III C-methyltransferase	100	49	40	81	162	100	86
	423838	425055		+	-	NGK_0518	Iron	HemY protein	30	44	44	34	110	50	48
	425130	426194		+	hemE	NGK_0519	Metabolism	uroporphyrinogen decarboxylase	48	0	43	23	122	48	92
	428146	426257		-	-	NGK_0520	DNA Metabolism	Putative stress-sensitive restriction system protein	0	30	33	84	8	8	8
	429184	428147		-	-	NGK_0521	DNA Metabolism	restriction endonuclease R.NgoVII	0	54	72	107	0	11	3
430224	430224	429181		-	-	NGK_0522	DNA Metabolism	site-specific DNA-methyltransferase M.NgoVII	0	25	103	113	9	15	5
	430712	432091		+	-	NGK_0523	DNA Metabolism	DNA repair protein RadA	16	10	19	38	40	36	7
	432129	432284		+	-	NGK_0524	Hypothetical	hypothetical protein	73	0	0	0	0	0	0
	432746	432366		-	-	NGK_0525	Membrane	Periplasmic protein	0	0	0	6	15	20	26
	432763	432942		+	-	NGK_0526	Hypothetical	hypothetical protein	0	0	0	4	11	0	0
	433329	432970		-	-	NGK_0527	Membrane	Putative periplasmic protein	0	0	0	8	19	16	0
	436970	433368		-	-	NGK_0528	DNA Metabolism	putative exodeoxyribonuclease	9	12	6	4	20	9	16
	438165	437047		-	-	NGK_0529	Hypothetical	hypothetical protein	38	50	23	36	41	16	31
438240	438240	439067		+	-	NGK_0530	Transport	amino acid ABC transporter substrate-binding protein	257	135	151	210	557	420	569
	439057	439773		+	-	NGK_0531	Transport	amino acid permease	52	39	64	14	94	64	123
439783	439783	440538	440538	+	-	NGK_0532	Transport	amino acid ABC transporter ATP-binding protein	106	75	0	48	188	100	181
	441976	440594		-	-	NGK_0533	Metabolism	protein Pgm	58	110	16	42	107	54	20
	442653	442144	442144	-	-	NGK_0534	Metabolism	putative peptidyl-prolyl cis-trans isomerase B	45	185	137	53	308	193	91
	444188	442773		-	-	NGK_0535	Transport	putative transport protein	63	0	0	18	26	15	11
	444982	444776		-	-	NGK_0536	Metabolism	Putative ring dioxygenase subunit beta	0	0	0	0	34	27	26
	444779	444417		-	-	NGK_0537	Hypothetical	hypothetical protein	0	0	0	0	17	9	21
	445621	445043	445043	-	-	NGK_0538	Translation	peptidyl-tRNA hydrolase	64	103	42	147	200	122	176
	445952	445674		-	-	NGK_0539	Other	Protein rnfH	14	0	0	17	7	29	44
	446382	445945		-	-	NGK_0540	Hypothetical	hypothetical protein	49	0	46	28	82	45	124
448565	448565	446598		-	-	NGK_0541	Replication	cell division protein FtsH	128	145	81	171	329	224	153
	449249	448629		-	-	NGK_0542	Replication	putative cell division protein	124	22	15	66	132	48	89
449323	449323	449643	449643	+	-	NGK_0543	Hypothetical	hypothetical protein	60	27	0	187	272	387	217
	449653	449799		+	-	NGK_0544	Hypothetical	hypothetical protein	0	0	0	47	36	77	0
	449827	450828	450828	+	-	NGK_0545	Metabolism	delta-aminolevulinic acid dehydratase	130	190	41	167	168	155	102
	452049	450892		-	-	NGK_0546	Metabolism	putative lyase	51	0	23	108	58	33	29
452153	452153	453025		+	-	NGK_0547	Metabolism	putative GTP cyclohydrolase	97	64	120	102	168	216	79
	453222	453887	453887	+	-	NGK_0548	Energy Metabolism	putative oxidoreductase, NAD(P)H-flavin	130	43	85	145	98	110	117
	454700	453942		-	-	NGK_0549	Translation	RNA-binding protein	82	0	36	91	102	77	71
	455615	454725		-	ppnK	NGK_0550	Metabolism	inorganic polyphosphate/ATP-NAD kinase	24	0	0	16	27	22	36
	456201	455635		-	-	NGK_0551	Hypothetical	hypothetical protein	351	0	0	133	189	178	127
	457027	456251		-	-	NGK_0552	Hypothetical	hypothetical protein	23	0	35	7	14	5	4
	457726	457082		-	-	NGK_0553	Regulator	putative TetR-family transcriptional regulator	55	48	0	62	91	84	71
	458784	457744		-	murB	NGK_0554	Metabolism	UDP-N-acetylenolpyruvoylglucosamine reductase	38	0	15	24	37	39	5
	460207	458828		-	-	NGK_0555	Host Interactions	multidrug efflux protein	31	20	0	26	51	38	38
	460568	460374		-	-	NGK_0556	Regulator	transcriptional regulatory protein	0	0	0	0	0	0	0
	460542	461693		+	hisZ	NGK_0557	Translation	ATP phosphoribosyltransferase	85	75	69	255	267	120	336
	461792	463096	463096	+	-	NGK_0558	Metabolism	adenylosuccinate synthetase	111	64	105	219	130	54	102
	463207	463335		+	-	NGK_0559	Hypothetical	hypothetical protein	0	0	0	0	0	0	0
	464171	463332	463332	-	-	NGK_0560	Stress	heat shock protein HtpX	335	140	70	83	290	185	61
	464284	464168		-	-	NGK_0561	Stress	heat shock protein HtpX	52	255	0	12	0	37	0
	464386	465033		+	adk	NGK_0562	Metabolism	adenylate kinase	94	111	167	183	197	102	95
	465557	466297	466297	+	-	NGK_0563	Metabolism	orotidine 5'-phosphate decarboxylase	185	74	36	119	136	109	33
	466353	467315		+	-	NGK_0564	Metabolism	putative sugar kinase / ADP-heptose synthase	23	0	0	55	98	30	55
	467331	468383		+	-	NGK_0565	Metabolism	ADP-L-glycero-D-manno-heptose-6-epimerase	27	27	26	59	108	115	44
	468458	470002		+	-	NGK_0566	DNA Metabolism	Type I restriction enzyme EcoR124II M protein	39	0	11	18	20	13	37
	470118	470969		+	dinD	NGK_0567	Stress	DNA-damage-inducible protein D	119	0	96	53	152	80	44
	471133	470981		-	-	NGK_0568	Hypothetical	hypothetical protein	0	0	0	0	0	0	9
	471136	471327		+	-	NGK_0569	DNA Metabolism	Type i restriction enzyme EcoR124II specificity protein	0	0	0	47	79	279	16
	471596	471459		-	-	NGK_0570	Other	Sensor protein	0	0	0	0	0	0	0
	471599	471751		+	-	NGK_0571	DNA Metabolism	putative type I specificity subunit HsdS	112	0	0	0	9	27	0
	471723	472346		+	-	NGK_0572	DNA Metabolism	Type I restriction-modification system specificity determinant	0	0	0	2	3	12	3
	472577	475675		+	-	NGK_0573	Metabolism	putative type I site-specific deoxyribonuclease	10	0	8	33	48	43	28
	478006	475715		-	-	NGK_0574	Metabolism	protein ClpA	21	0	33	28	24	26	18
	478421	478008		-	clpS	NGK_0575	Metabolism	ATP-dependent Clp protease adaptor protein ClpS	70	0	0	54	28	23	5
	478555	478758		+	-	NGK_0576	Stress	cold-shock domain family protein	369	316	523	2286	1003	1685	1638
	480388	479057		-	-	NGK_0577	Stress	PmbA protein	87	21	15	32	40	40	36
480458	480458	481048	481048	+	-	NGK_0578	Hypothetical	hypothetical protein	116	76	60	244	546	588	288
	481083	481808		+	-	NGK_0579	Metabolism	putative thiosulfate sulfur transferase	183	0	0	137	96	69	76
	481877	483577		+	-	NGK_0580	DNA Metabolism	RecJ	9	14	5	14	43	28	64
	483858	483697		-	-	NGK_0581	DNA Metabolism	DEAD/DEAH box helicase	0	0	0	0	0	0	0
	483935	485293		+	-	NGK_0582	DNA Metabolism	PcnB	39	27	20	67	111	81	86
485466	485466	485789		+	-	NGK_0583	Membrane	Periplasmic protein	161	159	170	190	138	114	208
	486847	485894		-	-	NGK_0584	Stress	PhoH-related protein	25	0	35	13	6	23	22
	487430	486873		-	-	NGK_0585	Metabolism	putative glycosyl transferase	8	0	0	0	3	0	4
	488080	487778		-	-	NGK_0586	Metabolism	RfaG protein	0	0	0	2	20	6	0
	487793	487458		-	-	NGK_0587	Hypothetical	hypothetical protein	116	0	0	0	4	0	0
	488212	488916		+	-	NGK_0588	Hypothetical	hypothetical protein	36	0	72	27	103	107	87
	489548	488982		-	dcd	NGK_0589	Metabolism	deoxycytidine triphosphate deaminase	14	0	0	16	13	51	23
	489999	489643		-	-	NGK_0590	Hypothetical	hypothetical protein	0	0	23	6	39	0	0
	490983	490084		-	rdgC	NGK_0591	DNA Metabolism	recombination associated protein	11	0	0	34	63	42	56
	492471	491014		-	engA	NGK_0592	Metabolism	GTP-binding protein EngA	62	18	18	21	90	72	57
	493250	492621		-	-	NGK_0593	Hypothetical	hypothetical protein	79	0	35	34	123	74	95
	494516	493251		-	hisS	NGK_0594	Translation	histidyl-tRNA synthetase	80	22	21	108	242	183	188
	494668	494513		-	-	NGK_0595	Hypothetical	hypothetical protein	39	0	0	29	86	104	33
	495330	494674		-	-	NGK_0596	Hypothetical	hypothetical protein	9	0	0	8	11	0	0
	495610	495386		-	-	NGK_0597	Hypothetical	hypothetical protein	0	0	0	5	1	29	0
	495977	495840		-	-	NGK_0598	Hypothetical	hypothetical protein	0	0	0	0	0	18	13
	496158	496045		-	-	NGK_0599	Hypothetical	hypothetical protein	0	0	0	0	0	0	0
	497908	497705		-	-	NGK_0600	Hypothetical	hypothetical protein	0	0	0	0	0	0	0
	498486	497944		-	-	NGK_0601	Hypothetical	hypothetical protein	0	0	0	0	1	1	5
	498651	499574		+	-	NGK_0602	Metabolism	pseudouridine synthase	0	0	0	54	17	26	3
	500294	499653		-	-	NGK_0603	Hypothetical	hypothetical protein	28	0	0	29	5	36	61
	501140	500349		-	-	NGK_0604	Metabolism	spermidine synthase	8	29	49	18	18	21	17
	501523	502314		+	panB	NGK_0605	Metabolism	3-methyl-2-oxobutanoate hydroxymethyltransferase	68	36	28	106	123	79	53
	502304	502480		+	-	NGK_0606	Hypothetical	hypothetical protein	33	0	0	53	140	77	79
	502494	503273		+	panC	NGK_0607	Amino Acid Metabolism	pantoate--beta-alanine ligase	75	12	0	43	47	46	49
	503594	505438		+	-	NGK_0608	Hypothetical	hypothetical protein	51	56	1	77	78	91	48
	505470	506159		+	lolB	NGK_0609	Membrane	outer membrane lipoprotein LolB	135	16	0	54	87	94	88
	506169	507014		+	ipk	NGK_0610	Metabolism	4-diphosphocytidyl-2-C-methyl-D-erythritol kinase	43	79	75	187	169	291	185
	507374	508336	508336	+	-	NGK_0611	Metabolism	ribose-phosphate pyrophosphokinase	50	95	154	267	288	297	292
508400	508403	508975	508991	+	-	NGK_0612	Translation	50S ribosomal protein L25	612	251	476	1095	2176	1746	1075
	510426	509101		-	-	NGK_0613	Host Interactions	Penicillin-binding protein	7	21	11	48	43	21	55
	510419	511945		+	-	NGK_0614	Amino Acid Metabolism	threonine dehydratase	141	14	11	86	109	40	82
	513077	512001		-	-	NGK_0615	Transport	ABC transporter ATP-binding protein	18	0	0	0	0	3	0
	514039	513218		-	-	NGK_0616	Transport	putative ABC transporter	0	0	0	0	4	0	0
	514992	514228		-	-	NGK_0617	Transport	sulfate ABC transporter, permease protein	0	0	0	1	2	9	12
	515243	515575		+	-	NGK_0618	Hypothetical	hypothetical protein	0	0	0	45	27	33	75
	515911	516414		+	-	NGK_0619	Membrane	membrane protein	193	92	106	498	168	402	266
	517227	516646		-	-	NGK_0620	Stress	Fe-superoxide dismutase SodB	130	69	47	31	86	54	123
517240	517240	517419		+	-	NGK_0621	Hypothetical	hypothetical protein	139	0	0	180	58	61	14
	517391	518794		+	-	NGK_0622	Replication	replicative DNA helicase	67	28	37	94	63	66	38
	519325	519714	519714	+	-	NGK_0623	Hypothetical	hypothetical protein	35	0	0	304	175	271	229
	519746	520360		+	-	NGK_0624	Pilin	putative type IV pilus assembly protein PilV	74	227	72	488	357	353	368
	520357	521316		+	-	NGK_0625	Hypothetical	hypothetical protein	112	62	75	313	428	670	470
	521295	521906	521906	+	-	NGK_0626	Pilin	type IV pilus assembly protein PilX	259	186	193	484	477	377	619
	521908	522381	522381	+	-	NGK_0627	Pilin	Putative type IV pilin-like protein	258	0	210	715	379	354	389
	522759	522451		-	-	NGK_0628	Hypothetical	hypothetical protein	0	0	0	15	0	0	0
	523112	522756		-	-	NGK_0629	Transport	AzlC-like protein	0	0	0	0	0	0	0
	523407	523126		-	-	NGK_0630	Transport	AzlC-like protein	0	0	0	0	0	0	0
	523633	524085	524085	+	dut	NGK_0631	Metabolism	deoxyuridine 5'-triphosphate nucleotidohydrolase	128	0	60	253	361	184	285
	524157	525344	525344	+	-	NGK_0632	Metabolism	succinyldiaminopimelate transaminase	45	9	37	137	120	43	88
	525500	526279		+	-	NGK_0633	Hypothetical	hypothetical protein	2	0	0	52	11	21	15
526727	526727	526849		+	-	NGK_0634	Hypothetical	hypothetical protein	0	0	0	156	21	5	0
	527032	528009		+	-	NGK_0635	Phage Associated	Putative Phage integrase	5	68	0	25	10	12	15
	527052	526846		-	-	NGK_0636	Host Interactions	Myb protein	0	0	0	0	0	0	0
	528607	528365		-	-	NGK_0637	Phage Associated	putative phage associated protein	0	0	0	21	7	9	50
	529512	528829		-	-	NGK_0638	Phage Associated	putative phage associated protein	6	37	0	17	17	10	27
	530101	529523		-	-	NGK_0639	Phage Associated	putative phage associated protein	0	0	0	13	11	5	8
	530385	530170		-	-	NGK_0640	Phage Associated	putative phage associated protein	0	0	0	25	9	11	0
	530928	530437		-	-	NGK_0641	Phage Associated	putative phage associated protein	0	57	0	12	8	29	0
	531149	530925		-	-	NGK_0642	Phage Associated	putative phage associated protein	0	0	0	0	15	66	0
	531933	531247		-	-	NGK_0643	Phage Associated	putative phage associated protein	0	0	0	12	10	17	15
	532163	532002		-	-	NGK_0644	Phage Associated	putative phage associated protein	0	135	0	29	12	7	0
	532193	532657		+	-	NGK_0645	Hypothetical	hypothetical protein	0	0	0	0	0	0	0
	533824	533348		-	-	NGK_0646	Phage Associated	putative phage associated protein	0	0	0	15	4	14	18
	534057	533857		-	-	NGK_0647	Phage Associated	putative phage associated protein	74	0	0	38	12	15	0
	534668	534255	534255	-	-	NGK_0648	Phage Associated	putative phage associated protein	15	0	0	334	51	112	78
	535102	534665		-	-	NGK_0649	Phage Associated	putative phage associated protein	37	65	54	440	100	108	45
	535580	535143		-	-	NGK_0650	Phage Associated	putative phage associated protein	302	223	0	1174	714	997	505
	536359	535697	535697	-	-	NGK_0651	Phage Associated	Putative lambda repressor protein cI phage associated protein	45	78	39	176	120	80	81
	536798	536953		+	-	NGK_0652	Phage Associated	putative phage associated protein	0	0	0	0	0	0	0
537118	537118	536930		-	-	NGK_0653	Phage Associated	putative phage associated protein	93	0	0	230	233	245	613
	537291	537518		+	-	NGK_0654	Phage Associated	putative phage associated protein	0	0	0	5	1	4	0
	537515	537652		+	-	NGK_0655	Hypothetical	hypothetical protein	0	0	0	0	8	0	0
	537636	538700		+	-	NGK_0656	Phage Associated	putative phage associated protein	0	0	25	0	0	0	2
	538697	540058		+	-	NGK_0657	Metabolism	Putative replicative DNA helicase phage associated protein	6	0	0	5	5	0	1
	540075	540305		+	-	NGK_0658	Phage Associated	putative phage associated protein	0	0	0	0	0	0	0
	540328	540891		+	-	NGK_0659	Phage Associated	putative phage associated protein	0	0	0	1	14	3	7
	540888	541049		+	-	NGK_0660	Phage Associated	putative phage associated protein	0	0	0	2	0	0	0
	541275	541424		+	-	NGK_0661	Phage Associated	putative phage associated protein	0	0	0	0	0	2	0
	541560	542162		+	-	NGK_0662	Phage Associated	putative phage associated protein	0	0	0	8	0	1	4
	542155	542460		+	-	NGK_0663	Phage Associated	putative phage associated protein	0	0	0	5	0	0	0
	542457	542840		+	-	NGK_0664	Phage Associated	putative phage associated protein	0	0	0	3	4	6	0
	542831	543349		+	-	NGK_0665	Phage Associated	putative phage associated protein	0	0	0	2	3	0	4
	543456	543836		+	-	NGK_0666	Phage Associated	putative phage associated protein	0	0	0	24	3	9	0
	543836	544375		+	-	NGK_0667	Phage Associated	putative phage associated protein	0	0	30	12	9	12	8
	544356	545630		+	-	NGK_0668	Phage Associated	putative phage associated protein	0	0	0	7	4	4	2
	545630	547882		+	-	NGK_0669	Phage Associated	putative phage associated protein	0	12	0	4	4	5	4
	548119	549315		+	-	NGK_0670	Phage Associated	putative phage associated protein	0	0	0	0	1	2	0
	549312	556616		+	-	NGK_0671	Phage Associated	putative phage associated protein	1	0	0	1	3	2	3
	556661	557221		+	-	NGK_0672	Phage Associated	putative phage associated protein	0	9	0	5	3	4	4
	557242	558537		+	-	NGK_0673	Phage Associated	putative phage associated protein	4	22	0	11	2	5	20
	558607	559065		+	-	NGK_0674	Phage Associated	putative phage associated protein	0	0	0	0	19	0	0
	559071	559556		+	-	NGK_0675	Phage Associated	putative phage associated protein	0	132	0	12	16	24	7
	559553	559828		+	-	NGK_0676	Hypothetical	hypothetical protein	23	0	0	2	0	9	0
	559819	560226		+	-	NGK_0677	Hypothetical	hypothetical protein	0	0	0	5	4	4	0
	560229	560378		+	-	NGK_0678	Phage Associated	putative phage associated protein	0	0	0	16	4	18	0
	561260	560415		-	-	NGK_0679	Phage Associated	putative phage associated protein	6	0	0	13	7	15	2
	561587	561420		-	-	NGK_0680	Hypothetical	hypothetical protein	0	0	0	6	75	91	0
	561821	561970		+	-	NGK_0681	Hypothetical	hypothetical protein	0	0	0	0	0	0	0
	562273	562067		-	-	NGK_0682	Hypothetical	hypothetical protein	0	0	0	5	0	0	0
	562527	562381		-	-	NGK_0683	Hypothetical	hypothetical protein	0	0	0	0	0	0	0
	562849	562547		-	-	NGK_0684	Hypothetical	hypothetical protein	0	0	0	18	42	50	16
565371	565371	563146	563146	-	-	NGK_0685	Metabolism	putative isocitrate dehydrogenase	147	88	39	82	178	143	123
	565611	565438		-	-	NGK_0686	Amino Acid Metabolism	serine/arginine repetitive matrix 2	0	0	0	0	0	0	0
	565701	566837		+	-	NGK_0687	Hypothetical	hypothetical protein	113	79	68	143	155	246	138
	567438	566980		-	-	NGK_0688	Energy Metabolism	putative C-type cytochrome	44	0	0	63	19	23	45
	567557	568378		+	-	NGK_0689	Energy Metabolism	putative oxidoreductase	0	16	0	47	21	37	21
568998	568998	568429		-	-	NGK_0690	Metabolism	putative acyl-CoA hydrolase	46	46	34	191	38	13	14
	569454	569591		+	-	NGK_0691	Hypothetical	hypothetical protein	75	129	0	9	38	20	0
	569754	569608		-	-	NGK_0692	Hypothetical	hypothetical protein	46	384	0	100	44	8	31
570506	570506	569796	569755	-	-	NGK_0693	Membrane	OpaD protein	477	126	215	337	417	390	804
	570770	570654		-	-	NGK_0694	Hypothetical	hypothetical protein	0	0	0	27	10	0	19
	572522	571005		-	-	NGK_0695	Host Interactions	putative serotype-1-specific antigen	50	18	34	51	85	103	59
	573443	573234	573234	-	-	NGK_0696	Membrane	putative outer membrane peptidase	127	0	0	46	250	1132	351
	573688	573443		-	-	NGK_0697	Transport	autotransporter serine protease (AusP)	94	12	192	535	341	1071	359
	573881	573669		-	-	NGK_0698	Transport	autotransporter serine protease (AusP)	127	239	68	362	144	417	158
	574156	573878		-	-	NGK_0699	Host Interactions	putative serotype-1-specific antigen	28	0	0	289	60	102	80
	574690	574343		-	-	NGK_0700	Replication	MafI protein	0	0	0	53	113	144	73
	575165	574842		-	-	NGK_0701	Hypothetical	hypothetical protein	0	0	84	40	17	71	45
	575302	575168		-	-	NGK_0702	Replication	MafB-like protein	0	0	0	55	35	96	72
	575693	575514	575514	-	-	NGK_0703	Replication	protein MafB5	0	130	152	226	136	252	85
	576237	576112		-	-	NGK_0704	Hypothetical	hypothetical protein	0	0	57	4	16	25	125
	578565	577159		-	-	NGK_0705	Replication	protein MafB2	17	40	0	47	33	75	50
	578685	578819		+	-	NGK_0706	Hypothetical	hypothetical protein	0	0	0	0	0	0	0
	578923	578807		-	-	NGK_0707	Hypothetical	hypothetical protein	0	0	0	51	0	30	54
580342	580342	579473		-	-	NGK_0708	Replication	protein MafB5	19	0	126	121	61	84	56
	581385	581513		+	-	NGK_0709	Hypothetical	hypothetical protein	0	0	0	0	0	0	0
	581984	581532	581532	-	-	NGK_0710	Replication	MAFB alternative C-terminus	0	0	33	122	210	419	195
	582871	582512		-	-	NGK_0711	Hypothetical	hypothetical protein	0	38	0	51	16	88	155
	584593	583064		-	-	NGK_0712	Host Interactions	adhesin	10	9	0	68	56	131	57
585595	585595	584633	584633	-	-	NGK_0713	Host Interactions	adhesin	41	55	28	146	103	139	76
	586042	585665		-	-	NGK_0714	Transposase	putative IS1016 transposase	0	75	63	59	32	135	108
	586344	586150		-	-	NGK_0715	Hypothetical	hypothetical protein	0	0	0	45	19	35	0
	588415	586334		-	-	NGK_0716	Stress	protein CstA	41	50	13	96	64	32	30
588889	588889	589011		+	-	NGK_0717	Hypothetical	hypothetical protein	57	100	0	213	91	63	160
	589816	589079		-	-	NGK_0718	Hypothetical	hypothetical protein	55	38	39	70	51	65	38
	590017	590241		+	-	NGK_0719	Hypothetical	hypothetical protein	23	0	0	38	7	16	0
	590238	591707		+	-	NGK_0720	Metabolism	putative succinate-semialdehyde dehydrogenase	45	0	36	32	9	6	20
	591818	592603		+	-	NGK_0721	Other	FimB protein	74	27	0	160	172	177	163
592731	592731	592922		+	-	NGK_0722	Hypothetical	hypothetical protein	97	0	0	37	128	411	340
	592971	594527		+	-	NGK_0723	Hypothetical	hypothetical protein	27	0	16	46	94	35	48
	594544	595290		+	surE	NGK_0724	Stress	stationary phase survival protein SurE	0	66	27	43	43	31	10
	595275	596405	596405	+	-	NGK_0725	Hypothetical	hypothetical protein	46	25	0	105	48	59	24
	596560	596420		-	-	NGK_0726	Hypothetical	hypothetical protein	0	0	0	0	13	0	0
	597285	596803		-	-	NGK_0727	Metabolism	putative acyl-CoA hydrolase	91	51	0	23	14	5	35
	597653	597438		-	-	NGK_0728	Hypothetical	hypothetical protein	0	0	0	28	1	3	0
	598134	597673		-	recX	NGK_0729	Regulator	recombination regulator RecX	15	62	0	28	47	33	22
	598917	598207		-	-	NGK_0730	Metabolism	phosphoglycolate phosphatase	42	123	0	65	27	36	9
	599191	598952		-	-	NGK_0731	Hypothetical	hypothetical protein	0	0	0	15	0	0	0
	599373	599233		-	-	NGK_0732	Hypothetical	hypothetical protein	0	0	0	0	0	0	0
	599514	599765		+	-	NGK_0733	Metabolism	glutamate dehydrogenase	0	0	0	7	49	6	60
	599752	600531		+	-	NGK_0734	Metabolism	glutamate dehydrogenase	0	0	0	6	6	7	20
	601397	600591	600591	-	-	NGK_0735	Hypothetical	hypothetical protein	26	35	29	109	39	39	6
	601574	601434		-	-	NGK_0736	Hypothetical	hypothetical protein	0	0	0	0	14	0	0
601589	601589	601798	601798	+	-	NGK_0737	Metabolism	4-oxalocrotonate tautomerase	0	0	0	133	86	11	32
	601887	603101		+	-	NGK_0738	Metabolism	aminotransferase	16	23	58	72	44	39	52
	605752	603173	603173	-	-	NGK_0739	Metabolism	putative ClpB protein	277	225	122	90	760	342	131
605878	605878	606015		+	-	NGK_0740	Hypothetical	hypothetical protein	11	204	0	132	108	124	160
	606012	607022		+	-	NGK_0741	Translation	tryptophanyl-tRNA synthetase	84	54	81	103	87	58	44
	607103	607648		+	-	NGK_0742	Hypothetical	hypothetical protein	52	32	0	58	79	11	125
	607789	607661		-	-	NGK_0743	Hypothetical	hypothetical protein	0	0	0	13	0	0	0
	607965	608309		+	-	NGK_0744	Hypothetical	hypothetical protein	386	212	268	1094	4140	1378	4169
	610027	608519		-	-	NGK_0745	Metabolism	putative exopolyphosphatase	16	48	0	26	32	32	13
	610039	610197		+	-	NGK_0746	Hypothetical	hypothetical protein	0	0	0	0	0	0	0
	610936	610190		-	-	NGK_0747	Hypothetical	hypothetical protein	17	0	0	23	41	5	0
610940	610940	611254		+	-	NGK_0748	Hypothetical	hypothetical protein	0	0	75	123	6	58	75
611443	611443	612129	612139	+	-	NGK_0749	Membrane	outer membrane protein	653	361	372	955	181	259	489
	612491	612871		+	-	NGK_0750	Hypothetical	hypothetical protein	0	20	72	181	12	22	0
	613048	613284	613284	+	-	NGK_0751	Transposase	putative transposase for IS1106A3	0	0	0	136	47	62	52
	613731	613387		-	-	NGK_0752	Hypothetical	hypothetical protein	0	0	0	0	0	0	0
	613786	614409		+	-	NGK_0753	Metabolism	putative transglycosylase	11	0	0	38	29	17	15
	614488	615903		+	-	NGK_0754	Host Interactions	Drug resistance translocase family protein	43	28	0	41	59	22	46
	615907	616431		+	-	NGK_0755	DNA Metabolism	putative single-stranded DNA binding protein	71	71	45	101	144	183	233
	616514	616828		+	-	NGK_0756	Hypothetical	hypothetical protein	0	0	0	41	27	28	0
	616837	617727		+	-	NGK_0757	Hypothetical	hypothetical protein	13	0	30	24	22	21	55
	619180	617792		-	fumC	NGK_0758	Metabolism	fumarate hydratase	189	113	72	94	28	52	1
	621303	619324		-	-	NGK_0759	Metabolism	transketolase	71	41	24	76	91	137	69
	621335	621478		+	-	NGK_0760	Metabolism	GTP-binding protein	0	0	0	0	1	0	0
	621695	621573		-	-	NGK_0761	Hypothetical	hypothetical protein	0	0	0	0	0	0	0
621688	621688	623334	623334	+	-	NGK_0762	Energy Metabolism	putative ferredoxin	68	78	45	133	153	95	85
	623337	623885		+	-	NGK_0763	Membrane	Inner membrane protein	38	40	46	42	80	73	3
	624065	623946		-	-	NGK_0764	Hypothetical	hypothetical protein	0	0	0	0	9	0	0
	624066	624179		+	-	NGK_0765	Hypothetical	hypothetical protein	0	0	0	32	8	0	0
	625402	624227	624227	-	-	NGK_0766	Metabolism	2-nitropropane dioxygenase	31	40	64	344	222	49	159
	626098	626892		+	-	NGK_0767	Replication	putative DNA polymerase III subunit	24	0	0	60	31	0	10
	626930	627538		+	-	NGK_0768	Replication	putative DNA polymerase III subunit	0	0	45	16	10	0	0
	627608	627808		+	-	NGK_0769	Hypothetical	hypothetical protein	0	0	0	2	7	0	0
	630218	627849		-	-	NGK_0770	Phage Associated	putative phage associated protein	7	0	0	0	7	9	2
	630331	630218		-	-	NGK_0771	Hypothetical	hypothetical protein	0	0	0	0	3	5	0
	630489	630307		-	-	NGK_0772	Hypothetical	hypothetical protein	0	0	0	0	21	19	56
	630810	630526		-	-	NGK_0773	Phage Associated	putative phage associated protein	20	0	0	0	3	5	0
	631027	630797		-	-	NGK_0774	Phage Associated	putative phage associated protein	0	0	0	0	0	0	0
	631329	631679		+	-	NGK_0775	Phage Associated	Putative phage repressor phage associated protein	55	0	97	85	49	16	0
	631913	632596		+	-	NGK_0776	Phage Associated	putative phage associated protein	6	83	94	118	76	146	68
	632571	632951		+	-	NGK_0777	Phage Associated	putative phage associated protein	27	0	0	72	128	186	208
	633173	633322		+	-	NGK_0778	Phage Associated	putative phage associated protein	0	0	183	56	6	40	7
	633523	633957		+	-	NGK_0779	Phage Associated	putative phage associated protein	0	0	0	61	39	26	43
	634077	634364		+	-	NGK_0780	Phage Associated	putative phage associated protein	0	0	74	33	8	72	43
	634438	634659		+	-	NGK_0781	Phage Associated	putative phage associated protein	168	0	0	64	108	127	125
	634652	634861		+	-	NGK_0782	Phage Associated	putative phage associated protein	22	0	0	4	36	62	126
	635129	635638		+	-	NGK_0783	Phage Associated	putative phage associated protein	13	0	0	63	37	44	65
	635688	636554		+	-	NGK_0784	Phage Associated	putative phage associated protein	12	0	0	15	15	20	3
	636687	637046		+	-	NGK_0785	Phage Associated	putative phage associated protein	47	0	0	11	70	13	0
	637212	637754		+	-	NGK_0786	Phage Associated	putative phage associated protein	0	0	0	10	25	13	25
	638156	638806		+	-	NGK_0787	DNA Metabolism	recombinase B	0	0	0	11	81	43	24
640424	640424	640756	640756	+	-	NGK_0788	Phage Associated	putative phage associated protein	0	0	0	8	310	317	0
	640856	641107		+	-	NGK_0789	Phage Associated	putative phage associated protein	0	0	0	0	56	0	0
643075	643075	641147	641147	-	-	NGK_0790	Transcription	RNA polymerase sigma factor RpoD	182	92	56	101	371	440	192
	645124	643262		-	dnaG	NGK_0791	DNA Metabolism	DNA primase	21	0	42	14	51	32	15
	647929	645179	645179	-	-	NGK_0792	Transport	preprotein translocase subunit SecA	68	45	36	77	201	265	89
648061	648061	648483		+	-	NGK_0793	Hypothetical	hypothetical protein	120	67	0	84	184	107	115
	648628	648464		-	-	NGK_0794	Hypothetical	hypothetical protein	0	0	0	0	0	0	0
648712	648712	649317	649317	+	-	NGK_0795	Membrane	outer membrane protein	165	115	313	181	472	537	263
	649412	649921		+	-	NGK_0796	Hypothetical	hypothetical protein	71	0	53	32	15	10	0
	649955	650575		+	-	NGK_0797	Hypothetical	hypothetical protein	0	0	44	4	21	51	12
	650598	651833		+	-	NGK_0798	Metabolism	succinyl-diaminopimelate desuccinylase	65	37	0	24	45	26	8
	652253	653068		+	-	NGK_0799	Regulator	putative AraC-family transcriptional regulator	16	0	0	30	31	18	20
	653603	653418		-	-	NGK_0800	Hypothetical	Hypothetical outer membrane protein	0	0	0	0	7	0	0
653836	653836	654705	654705	+	-	NGK_0801	Metabolism	Methylated-DNA-protein-cysteinemethyltransferase	10	0	0	126	19	29	22
655102	655102	656112		+	-	NGK_0802	Metabolism	ADP-heptose--LPS heptosyltransferase II	20	28	54	46	174	169	177
	656161	656613		+	smpB	NGK_0803	Translation	SsrA-binding protein	166	176	73	275	111	130	132
	656947	656783		-	-	NGK_0804	Metabolism	thymidylate kinase	0	28	117	10	6	8	10
	656934	657056		+	-	NGK_0805	Transport	autotransported protein Lav	14	0	0	9	13	31	0
657285	657285	657398		+	-	NGK_0806	Hypothetical	hypothetical protein	0	0	194	301	574	799	588
	657923	659014	659014	+	-	NGK_0807	Host Interactions	putative virulence associated protein	85	0	25	104	343	374	170
	660710	659343		-	-	NGK_0808	Energy Metabolism	Oxidoreductase, putative	32	0	19	7	2	5	0
	661131	660820		-	-	NGK_0809	Host Interactions	Serum response factor-binding protein 1	34	205	210	89	163	159	72
	661438	661575		+	-	NGK_0810	Hypothetical	hypothetical protein	0	0	0	4	9	7	13
	661556	662086	662086	+	-	NGK_0811	Metabolism	putative peptidyl-prolyl cis-trans isomerase	275	0	0	404	402	219	471
	662187	662074		-	-	NGK_0812	Hypothetical	hypothetical protein	0	0	0	0	0	0	0
	662158	662985		+	-	NGK_0813	Metabolism	putative transferase	57	0	0	14	34	35	52
	663528	663058		-	-	NGK_0814	Hypothetical	hypothetical protein	82	0	0	88	48	64	21
663619	663619	665460	665460	+	dipZ	NGK_0815	Metabolism	thiol:disulfide interchange protein	157	30	86	146	299	190	452
	665649	665491		-	-	NGK_0816	Hypothetical	hypothetical protein	0	0	0	0	0	0	25
	667200	665974	665974	-	-	NGK_0817	Metabolism	acetate kinase	251	220	121	134	241	192	187
	667354	667485		+	-	NGK_0818	Hypothetical	hypothetical protein	0	0	0	25	0	0	34
	667655	667482		-	-	NGK_0819	Hypothetical	hypothetical protein	0	0	0	0	0	0	0
	667632	667820	667820	+	-	NGK_0820	Hypothetical	hypothetical protein	46	172	0	163	61	56	54
667841	667841	668005		+	-	NGK_0821	Other	FixS	0	251	0	126	93	106	72
	667995	669305		+	-	NGK_0822	Membrane	Putative integral membrane protein	66	37	18	50	38	16	43
	669461	670195		+	-	NGK_0823	Replication	putative DNA polymerase III, epsilon chain	54	0	72	170	120	70	45
	670192	670881		+	ispD	NGK_0824	Metabolism	2-C-methyl-D-erythritol 4-phosphate cytidylyltransferase	7	0	25	43	70	31	29
	670871	671395		+	ispF	NGK_0825	Metabolism	2-C-methyl-D-erythritol 2,4-cyclodiphosphate synthase	0	0	26	34	56	69	28
	671472	672143		+	-	NGK_0826	Metabolism	ribose-5-phosphate isomerase A	36	14	48	74	77	63	60
	672182	672883		+	-	NGK_0827	Metabolism	Thermonuclease family protein	0	0	0	19	40	18	3
	673062	673808		+	-	NGK_0828	Transport	Amino acid ABC transporter, permease protein	44	37	0	97	163	91	169
	673861	673983		+	-	NGK_0829	Hypothetical	hypothetical protein	0	0	0	0	0	0	0
	674255	673995		-	-	NGK_0830	Hypothetical	hypothetical protein	0	0	0	11	10	10	22
	675718	674261		-	-	NGK_0831	Hypothetical	hypothetical protein	3	4	23	21	13	15	7
	677953	676235		-	argS	NGK_0832	Translation	arginyl-tRNA synthetase	71	26	15	49	58	60	13
	679253	678045		-	-	NGK_0833	Metabolism	nicotinate phosphoribosyltransferase	46	0	0	8	25	56	21
	680148	679294		-	-	NGK_0834	Replication	segregation and condensation protein A	20	33	0	11	19	21	35
	680389	680258		-	-	NGK_0835	Hypothetical	hypothetical protein	32	0	0	0	13	16	20
	681184	680393		-	-	NGK_0836	Metabolism	HesA/MoeB/ThiF family protein	9	0	57	8	66	23	110
	681386	681850		+	-	NGK_0837	Hypothetical	hypothetical protein	174	61	0	475	217	145	96
	681932	682660		+	rph	NGK_0838	Metabolism	ribonuclease PH	0	0	0	39	28	14	22
	682846	682661		-	-	NGK_0839	Hypothetical	hypothetical protein	0	0	0	0	0	3	0
	682862	684079		+	-	NGK_0840	Metabolism	aspartate kinase	67	118	36	186	146	133	99
	684079	684216		+	-	NGK_0841	Hypothetical	hypothetical protein	0	0	0	8	0	20	0
	684311	684481		+	-	NGK_0842	Hypothetical	hypothetical protein	0	0	0	2	7	14	0
	685074	684859		-	-	NGK_0843	Hypothetical	hypothetical protein	0	0	0	0	9	2	0
	687822	685105		-	-	NGK_0844	Iron	putative TonB-dependent receptor protein	79	20	9	44	72	55	0
	687905	688042		+	-	NGK_0845	Pilin	pilS cassette	0	25	0	23	9	0	0
	688202	688032		-	-	NGK_0846	Hypothetical	hypothetical protein	86	0	133	44	36	13	0
	688890	688216	688216	-	-	NGK_0847	Membrane	outer membrane protein	143	61	210	260	62	144	374
	689186	689482		+	-	NGK_0848	Hypothetical	hypothetical protein	0	0	0	19	4	5	56
	689475	690407		+	-	NGK_0849	Amino Acid Metabolism	proline iminopeptidase Pip	5	30	29	36	6	10	15
691660	691660	690464	690464	-	-	NGK_0850	Hypothetical	hypothetical protein	99	77	42	110	150	101	118
	692529	691669		-	-	NGK_0851	Metabolism	dihydrodipicolinate synthase	314	60	212	87	163	137	55
	692924	693256		+	-	NGK_0852	Transport	putative transmembrane transport protein	9	0	0	43	9	8	23
	693234	694298		+	-	NGK_0853	Transport	putative transmembrane transport protein	13	0	0	20	12	15	6
	695112	694360		-	-	NGK_0854	Metabolism	RNA methylase	59	38	0	65	40	30	16
	695666	695178		-	-	NGK_0855	Membrane	Membrane protein	10	0	39	19	22	18	8
	696390	695671		-	-	NGK_0856	Amino Acid Metabolism	putative cytosine deaminase	12	0	0	1	11	10	13
	697335	696394		-	miaA	NGK_0857	Translation	tRNA delta(2)-isopentenylpyrophosphate transferase	9	29	58	18	7	20	4
	697337	697648		+	-	NGK_0858	Hypothetical	hypothetical protein	0	0	0	0	0	0	0
	697656	697964		+	-	NGK_0859	Membrane	Membrane protein	15	0	0	12	11	20	19
	697977	699134		+	-	NGK_0860	Hypothetical	hypothetical protein	24	0	35	18	24	26	9
699177	699177	699737	699737	+	-	NGK_0861	Translation	elongation factor P	1675	1074	685	1311	3589	1382	6201
	700301	699786		-	-	NGK_0862	Lipoprotein	putative lipoprotein	0	0	0	14	45	78	67
	700715	700524		-	-	NGK_0863	Lipoprotein	putative lipoprotein	0	0	0	13	7	19	0
	700825	700712		-	-	NGK_0864	Hypothetical	hypothetical protein	0	0	0	56	75	13	0
	701413	700832		-	-	NGK_0865	Hypothetical	hypothetical protein	18	0	0	42	41	96	46
	702564	701410		-	metX	NGK_0866	Metabolism	homoserine O-acetyltransferase	23	25	23	82	74	38	41
	702692	702910		+	-	NGK_0867	Energy Metabolism	NADH dehydrogenase I subunit N	0	0	0	0	16	0	32
	703121	702996		-	rpmJ	NGK_0868	Translation	50S ribosomal protein L36	183	0	260	825	316	395	126
	703396	703121		-	rpmE2	NGK_0869	Translation	50S ribosomal protein L31	243	389	810	980	283	383	85
	703587	704471		+	metF	NGK_0870	Metabolism	5,10-methylenetetrahydrofolate reductase	73	0	0	6	162	152	102
	704658	706883		+	-	NGK_0871	Metabolism	5-methyltetrahydropteroyltriglutamate/homocysteine S-methyltransferase	372	223	147	157	534	434	710
	706895	707059		+	-	NGK_0872	Hypothetical	hypothetical protein	115	0	131	48	59	87	11
707130	707162	707899	707899	+	-	NGK_0873	Energy Metabolism	Peroxiredoxin 2 family protein/glutaredoxin	3711	1994	2460	4432	7205	7574	5375
708082	708082	709551	709551	+	-	NGK_0874	Metabolism	dihydrolipoamide dehydrogenase	112	120	51	125	122	148	122
	709568	709777		+	-	NGK_0875	Hypothetical	hypothetical protein	0	0	29	13	10	2	0
	709838	710215		+	-	NGK_0876	Metabolism	Succinate dehydrogenase cytochrome B subunit	281	274	160	443	290	264	170
	710209	710550	710550	+	-	NGK_0877	Metabolism	Succinate dehydrogenase hydrophobic membrane anchor protein	0	0	51	107	56	39	11
710553	710553	712316	712316	+	-	NGK_0878	Metabolism	Succinate dehydrogenase, flavoprotein subunit	117	94	15	180	146	94	140
	712436	713143	713143	+	sdhB	NGK_0879	Metabolism	succinate dehydrogenase iron-sulfur subunit	132	138	105	176	245	165	253
713147	713147	713395		+	-	NGK_0880	Hypothetical	hypothetical protein	62	344	251	438	385	484	331
	713507	714790		+	gltA	NGK_0881	Metabolism	type II citrate synthase	220	62	0	191	318	250	176
714911	714911	717823	717823	+	sucA	NGK_0882	Energy Metabolism	2-oxoglutarate dehydrogenase E1	87	111	72	106	224	171	149
	717923	719104		+	-	NGK_0883	Metabolism	dihydrolipoamide succinyltransferase	44	213	68	89	230	184	259
	719280	719122		-	-	NGK_0884	Hypothetical	hypothetical protein	0	0	0	0	0	0	0
	719365	720798	720798	+	-	NGK_0885	Metabolism	dihydrolipoamide dehydrogenase	130	55	35	92	180	129	148
	720918	721205	721205	+	-	NGK_0886	Membrane	Membrane protein	0	0	94	200	275	175	131
	721277	722443		+	sucC	NGK_0887	Metabolism	succinyl-CoA synthetase subunit beta	249	214	92	355	409	281	515
	722454	723344	723344	+	-	NGK_0888	Metabolism	succinyl-CoA synthetase subunit alpha	300	159	151	467	504	340	365
	723500	723369		-	-	NGK_0889	Hypothetical	hypothetical protein	0	0	0	0	10	4	0
	724134	723661		-	-	NGK_0890	Transposase	putative transposase	0	0	0	4	7	0	4
	724337	724753		+	-	NGK_0891	Hypothetical	hypothetical protein	0	0	65	21	7	4	28
	724758	725336		+	-	NGK_0892	Transposase	putative IS150 ORF B	0	0	26	11	8	4	0
	725333	725578		+	-	NGK_0893	Transposase	putative IS150 ORF B	0	0	0	19	29	5	12
	725754	726020		+	-	NGK_0894	Replication	trafficking protein A	0	0	0	86	25	11	52
	726020	726439		+	-	NGK_0895	Replication	trafficking protein B	0	0	0	35	26	23	31
	728042	726588		-	-	NGK_0896	Metabolism	(Fe-S)-binding protein	52	39	51	76	102	139	26
	728740	728039		-	-	NGK_0897	Hypothetical	hypothetical protein	63	41	64	109	136	131	72
729594	729594	728737		-	-	NGK_0898	Hypothetical	hypothetical protein	82	144	32	225	129	168	96
	729664	731205		+	-	NGK_0899	Membrane	putative integral membrane protein	22	0	0	14	13	18	4
	731336	731202		-	-	NGK_0900	Hypothetical	hypothetical protein	0	0	0	0	1	3	0
	731377	732843		+	-	NGK_0901	Metabolism	putative phopholipase D-family protein	26	0	37	5	3	6	0
	732846	733433		+	-	NGK_0902	Lipoprotein	putative lipoprotein	9	0	46	7	3	8	9
	734812	733511		-	-	NGK_0903	Metabolism	3-phosphoshikimate 1-carboxyvinyltransferase	32	0	51	6	21	22	0
	735045	734809		-	-	NGK_0904	Hypothetical	hypothetical protein	0	0	30	0	0	0	0
	735155	735679	735679	+	greA	NGK_0905	Transcription	transcription elongation factor GreA	188	0	352	192	254	203	125
	735971	736252		+	-	NGK_0906	Transport	porin	0	0	0	8	10	12	0
	736237	737148		+	-	NGK_0907	Transport	porin	4	0	0	6	5	8	5
	737359	737195		-	-	NGK_0908	Hypothetical	hypothetical protein	0	0	136	0	0	4	0
	737407	737538		+	-	NGK_0909	Hypothetical	hypothetical protein	0	0	0	0	3	88	86
	737711	737893		+	-	NGK_0910	Hypothetical	hypothetical protein	0	0	0	66	53	52	55
	738955	737954		-	-	NGK_0911	Translation	tRNA-dihydrouridine synthase C	0	0	0	0	15	12	5
	742952	739032		-	-	NGK_0912	Energy Metabolism	putative oxidoreductase	19	2	5	17	38	23	29
	743328	743047		-	-	NGK_0913	Hypothetical	hypothetical protein	0	0	0	17	0	0	2
	743520	743864	743864	+	-	NGK_0914	Hypothetical	hypothetical protein	76	0	59	475	75	78	34
	743961	745652	745652	+	-	NGK_0915	Metabolism	D-lactate dehydrogenase	94	17	32	153	78	142	82
	745837	746208		+	-	NGK_0916	Hypothetical	hypothetical protein	0	0	111	35	104	57	87
	746348	746896		+	-	NGK_0917	Host Interactions	Macrophage infectivity potentiator-related protein	0	0	0	0	14	6	18
	747034	748116		+	-	NGK_0918	Metabolism	putative acyl-CoA dehydrogenase	6	0	0	0	1	1	14
	748165	748419		+	-	NGK_0919	Energy Metabolism	rebredoxin	0	0	0	4	22	2	0
	748874	748395		-	-	NGK_0920	Hypothetical	hypothetical protein	36	0	0	36	32	19	57
	749094	749510		+	-	NGK_0921	Hypothetical	hypothetical protein	10	0	0	22	4	8	0
	749515	750093		+	-	NGK_0922	Transposase	putative IS150 ORF B	0	0	47	9	0	1	0
	750090	750335		+	-	NGK_0923	Transposase	putative IS150 ORF B	0	0	0	24	11	0	25
	751749	751078		-	-	NGK_0924	Hypothetical	hypothetical protein	0	0	0	29	29	20	6
	751780	751971		+	-	NGK_0925	Hypothetical	hypothetical protein	0	0	0	0	0	0	0
	752110	752226		+	-	NGK_0926	Hypothetical	hypothetical protein	0	0	0	0	0	1	0
	752904	752263		-	-	NGK_0927	Metabolism	putative sulfate-binding protein	38	0	0	1	28	41	63
	753311	752958		-	-	NGK_0928	Transport	sulfate ABC transporter substrate-binding protein	15	0	0	4	20	69	8
	753899	753417		-	-	NGK_0929	Hypothetical	hypothetical protein	0	0	0	2	4	10	0
	755052	753946		-	-	NGK_0930	Metabolism	phosphoribosylaminoimidazole carboxylase ATPase subunit	29	44	24	10	68	28	17
	755959	755099		-	-	NGK_0931	DNA Metabolism	putative DNA restriction endonuclease	4	0	0	21	35	37	16
	756898	755960		-	-	NGK_0932	DNA Metabolism	DNA modification methylase	9	29	58	40	78	99	31
	758496	756982		-	-	NGK_0933	Metabolism	anthranilate synthase component I	41	16	10	7	38	27	22
	758935	758606		-	-	NGK_0934	Hypothetical	hypothetical protein	0	0	83	23	12	17	0
	760885	758957		-	-	NGK_0935	Regulator	putative ATP-binding protein	36	14	14	50	39	69	40
	761530	760886		-	-	NGK_0936	Membrane	DedA protein	13	0	0	42	14	21	10
	762472	761681		-	-	NGK_0937	Membrane	OpcA protein	24	0	34	3	12	11	10
	763412	763801	763801	+	-	NGK_0938	Hypothetical	hypothetical protein	274	11	131	226	106	112	137
	765124	763874		-	glyA	NGK_0939	Amino Acid Metabolism	serine hydroxymethyltransferase	113	52	39	155	206	187	124
	765433	765191		-	-	NGK_0940	Hypothetical	hypothetical protein	0	0	37	68	40	79	28
766850	766850	765606		-	-	NGK_0941	Metabolism	gamma-glutamyl aminopeptidase	45	23	77	108	72	130	81
	767062	766940		-	-	NGK_0942	Metabolism	gamma-glutamyl aminopeptidase	107	226	6	358	52	92	68
767831	767831	768217	768217	+	-	NGK_0943	Hypothetical	hypothetical protein	150	250	136	1075	96	97	177
769539	769539	768376		-	-	NGK_0944	Metabolism	fructose-1,6-bisphosphatase	72	44	128	125	102	196	75
	769593	769841		+	-	NGK_0945	Hypothetical	hypothetical protein	269	590	335	1892	632	611	506
769891	769891	770223	770223	+	-	NGK_0946	Other	putative secreted protein	643	451	375	1284	583	794	483
	771243	770332		-	-	NGK_0947	Hypothetical	hypothetical protein	27	0	0	17	13	6	0
	771871	771269		-	-	NGK_0948	Hypothetical	hypothetical protein	15	23	28	45	47	34	22
771927	771927	772283		+	-	NGK_0949	Metabolism	putative dihydroneopterin aldolase	100	49	0	220	97	109	70
772317	772317	772853		+	-	NGK_0950	Metabolism	ADP-ribose pyrophosphatase	37	90	51	185	53	94	0
	773033	773170		+	-	NGK_0951	Hypothetical	hypothetical protein	0	0	0	44	23	45	46
	773817	773458		-	-	NGK_0952	Stress	camphor resistance protein CrcB	29	0	0	17	17	25	98
	774526	773846		-	-	NGK_0953	Membrane	membrane protein	28	0	68	16	17	2	13
	774556	774696		+	-	NGK_0954	Hypothetical	hypothetical protein	0	0	0	6	10	0	0
	774732	777776		+	-	NGK_0955	Replication	putative cell-division protein	32	37	6	73	64	42	19
	779214	777952		-	proA	NGK_0956	Metabolism	gamma-glutamyl phosphate reductase	3	0	0	50	11	4	0
	779445	779227		-	-	NGK_0957	Metabolism	glutamate 5-kinase	6	0	0	11	20	0	0
	780332	779445		-	-	NGK_0958	Metabolism	glutamate 5-kinase	42	32	0	129	30	40	11
	780446	780565		+	-	NGK_0959	Hypothetical	hypothetical protein	26	0	0	34	103	19	23
	780578	782371		+	-	NGK_0960	Metabolism	2-isopropylmalate synthase	116	50	0	93	82	55	25
	782567	783232		+	-	NGK_0961	Hypothetical	hypothetical protein	18	0	0	124	69	45	46
	784168	783317		-	-	NGK_0962	Metabolism	prolipoprotein diacylglyceryl transferase	40	0	0	10	24	12	3
	785447	784242		-	-	NGK_0963	Hypothetical	hypothetical protein	40	23	45	54	39	58	38
	785542	786438		+	-	NGK_0964	Metabolism	acetylglutamate kinase	20	23	0	89	20	20	0
	786708	786556		-	-	NGK_0965	Hypothetical	hypothetical protein	0	0	102	0	0	0	0
	787024	786737		-	-	NGK_0966	Other	ubiquitin-activating enzyme E1 family protein	0	0	3	0	2	0	0
	787697	787029		-	-	NGK_0967	Hypothetical	hypothetical protein	17	41	0	15	14	23	17
	788362	787694		-	-	NGK_0968	Regulator	DnaA regulatory inactivator Hda	28	39	0	38	34	33	6
	788433	788570		+	-	NGK_0969	Hypothetical	hypothetical protein	0	0	0	0	0	0	0
	789857	788583		-	-	NGK_0970	Transport	SbmA protein	0	0	0	1	15	23	10
	790232	789861		-	-	NGK_0971	Hypothetical	hypothetical protein	0	0	0	11	6	19	0
	790585	790442		-	-	NGK_0972	Hypothetical	hypothetical protein	0	0	0	0	0	1	0
	791272	790625		-	-	NGK_0973	Hypothetical	hypothetical protein	30	0	0	27	24	27	13
791638	791638	791348		-	-	NGK_0974	Hypothetical	hypothetical protein	2	83	0	108	14	28	28
792316	792316	791645		-	-	NGK_0975	Hypothetical	hypothetical protein	198	101	40	327	254	291	165
	793201	792482		-	-	NGK_0976	Metabolism	short chain dehydrogenase	53	92	0	41	22	29	10
	794596	793283		-	-	NGK_0977	Energy Metabolism	Putative oxidoreductase	9	0	18	11	24	8	4
	795543	794671		-	-	NGK_0978	Metabolism	putative poly-isoprenyl transferase	15	0	50	49	36	10	37
	795558	797576		+	hscA	NGK_0979	Stress	chaperone protein HscA	76	18	34	29	69	28	34
	797638	797799		+	-	NGK_0980	Hypothetical	hypothetical protein	0	0	0	21	56	15	0
	797883	798410		+	-	NGK_0981	Hypothetical	hypothetical protein	15	107	0	43	24	60	18
	798446	799198	799198	+	-	NGK_0982	Hypothetical	hypothetical protein	98	111	72	77	169	110	106
	799254	799595		+	-	NGK_0983	Energy Metabolism	putative ferredoxin	147	64	159	83	46	34	20
	799873	799655		-	-	NGK_0984	Hypothetical	hypothetical protein	0	0	0	41	2	0	0
	800195	799848		-	-	NGK_0985	Hypothetical	hypothetical protein	0	0	0	62	64	21	34
800292	800292	800411		+	-	NGK_0986	Hypothetical	hypothetical protein	75	229	50	314	100	25	101
	800408	800605	800605	+	-	NGK_0987	Hypothetical	hypothetical protein	343	432	267	303	151	77	87
	801074	800673		-	-	NGK_0988	Stress	Ribosome-associated heat shock protein Hsp15	17	65	121	74	54	56	19
	801286	802239		+	-	NGK_0989	Metabolism	acetyl-CoA carboxylase carboxyltransferase subunit alpha	123	208	270	316	225	222	160
	802286	803623		+	-	NGK_0990	Translation	tRNA(Ile)-lysidine synthase	6	50	67	9	34	36	31
	803697	804482		+	-	NGK_0991	Metabolism	putative RNA methyltransferase	17	21	0	45	46	68	14
	804492	804689		+	-	NGK_0992	Hypothetical	hypothetical protein	30	0	0	23	35	5	1
805068	805068	805304	805304	+	-	NGK_0993	Hypothetical	hypothetical protein	18	0	0	229	32	70	17
805316	805316	805621		+	-	NGK_0994	Hypothetical	hypothetical protein	85	162	49	309	90	57	84
	805683	807059		+	-	NGK_0995	Metabolism	UDP-N-acetylmuramate:L-alanyl-gamma-D-glutamyl-meso-diaminopimelate ligase	115	45	32	100	90	43	39
	807068	808318		+	-	NGK_0996	Metabolism	putative biotin synthase	49	7	25	15	28	31	18
	809214	808414		-	-	NGK_0997	Hypothetical	hypothetical protein	29	0	0	15	9	18	0
	809527	809225		-	-	NGK_0998	Hypothetical	hypothetical protein	0	0	0	14	22	12	30
	811575	809569		-	-	NGK_0999	Metabolism	dihydroxy-acid dehydratase	45	0	20	31	63	70	50
	812998	811601		-	-	NGK_1000	Energy Metabolism	putative sulfite reductase subunit beta	0	0	0	2	0	0	0
	813396	813079		-	-	NGK_1001	Energy Metabolism	sulfite reductase hemoprotein, beta-component	0	0	0	3	6	10	0
	814427	813393		-	-	NGK_1002	Energy Metabolism	putative sulfite reductase subunit alpha	0	0	0	0	0	2	0
	815115	814432		-	-	NGK_1003	Energy Metabolism	putative sulfite reductase subunit alpha	0	0	0	1	0	0	0
	816265	815183		-	-	NGK_1004	Hypothetical	hypothetical protein	0	0	0	0	1	1	0
	816365	816487		+	-	NGK_1005	Hypothetical	hypothetical protein	0	0	0	18	8	0	0
	817350	816694		-	-	NGK_1006	Energy Metabolism	Nickel-dependent hydrogenase, b-type cytochrome subunit	0	0	0	7	11	20	14
	817415	818305		+	-	NGK_1007	Hypothetical	hypothetical protein	6	0	0	28	24	6	0
818422	818422	820233	820233	+	-	NGK_1008	Metabolism	putative GTP-binding protein	176	43	63	186	417	276	318
	820604	820230		-	-	NGK_1009	Hypothetical	hypothetical protein	19	36	70	96	123	93	16
	820934	823309		+	-	NGK_1010	Metabolism	putative ribonuclease	55	8	10	70	60	41	21
	823325	823573		+	-	NGK_1011	Hypothetical	hypothetical protein	7	0	0	12	18	7	0
	825109	823646	823646	-	-	NGK_1012	Metabolism	inosine 5'-monophosphate dehydrogenase	101	80	96	148	70	65	127
	827814	825256		-	-	NGK_1013	Metabolism	putative uridylyltransferase	0	0	4	5	4	2	4
	828183	827863		-	-	NGK_1014	Regulator	putative transcriptional regulator	15	0	55	56	14	25	37
	828386	828508		+	-	NGK_1015	Hypothetical	hypothetical protein	0	0	0	0	27	32	0
	828978	828505		-	-	NGK_1016	Metabolism	putative bacterioferritin B	160	0	0	247	470	463	126
	829470	829006	829006	-	-	NGK_1017	Iron	bacterioferritin A	165	116	118	318	587	670	183
	829635	829486		-	-	NGK_1018	Hypothetical	hypothetical protein	0	0	0	59	57	42	0
	830928	829945		-	-	NGK_1019	Metabolism	lipoyl synthase	58	59	0	34	56	97	64
	831544	830921		-	lipB	NGK_1020	Metabolism	lipoate-protein ligase B	192	80	61	185	68	50	36
831821	831821	831546	831546	-	-	NGK_1021	Hypothetical	hypothetical protein	95	0	0	169	59	98	82
	831820	831948		+	-	NGK_1022	Hypothetical	hypothetical protein	0	0	0	0	0	0	0
	831997	833076		+	-	NGK_1023	Transport	Transporter, putative	9	0	0	25	15	19	13
	834130	833183		-	-	NGK_1024	Membrane	membrane protein	63	20	28	95	78	71	89
	834552	834145		-	-	NGK_1025	Hypothetical	hypothetical protein	0	64	0	47	53	68	44
	834633	835292		+	-	NGK_1026	DNA Metabolism	uracil-DNA glycosylase	70	0	0	23	24	8	15
	835488	835309		-	-	NGK_1027	Energy Metabolism	oxidoreductase	26	0	0	6	26	43	37
	835474	835608		+	-	NGK_1028	Hypothetical	hypothetical protein	0	0	0	3	7	2	0
	835664	835846		+	-	NGK_1029	Energy Metabolism	NADH dehydrogenase subunit 2	0	0	0	0	11	0	0
	836087	836974		+	-	NGK_1030	Replication	protein ParA	0	0	0	0	0	0	0
	836971	838461		+	-	NGK_1031	Replication	ParB family partitioning protein	0	0	0	0	0	0	0
	838535	839056		+	-	NGK_1032	Hypothetical	hypothetical protein	0	0	0	0	0	0	0
	839053	839808		+	-	NGK_1033	Hypothetical	hypothetical protein	0	0	0	0	0	0	0
	839799	841325		+	-	NGK_1034	Hypothetical	hypothetical protein	0	0	0	0	0	0	0
	841463	842566		+	-	NGK_1035	Hypothetical	hypothetical protein	38	0	0	0	0	0	0
	842653	843207		+	-	NGK_1036	Hypothetical	hypothetical protein	0	0	0	0	0	0	0
	843587	844018		+	-	NGK_1037	Other	protein SsbB	0	0	0	0	0	0	0
	844210	846249		+	-	NGK_1038	DNA Metabolism	protein TopB	0	0	0	0	0	0	0
	846237	846803		+	-	NGK_1039	Hypothetical	hypothetical protein	0	0	0	0	0	0	0
	846816	846914		+	-	NGK_1040	Hypothetical	hypothetical protein	0	0	0	0	0	0	0
	846907	847479		+	-	NGK_1041	Hypothetical	hypothetical protein	0	0	0	0	0	0	0
	848906	849310		+	-	NGK_1042	Hypothetical	hypothetical protein	0	0	0	0	0	0	0
	849377	849892		+	-	NGK_1043	Hypothetical	hypothetical protein	0	0	0	0	0	0	0
	849902	850483		+	-	NGK_1044	Hypothetical	hypothetical protein	0	0	0	0	0	0	0
	850808	851116		+	-	NGK_1045	Hypothetical	hypothetical protein	0	0	0	0	6	5	0
	851451	851633		+	-	NGK_1046	Hypothetical	hypothetical protein	0	0	0	0	0	0	0
	851899	852126		+	-	NGK_1047	Hypothetical	hypothetical protein	0	0	0	0	0	0	0
	852222	854705		+	-	NGK_1048	Hypothetical	hypothetical protein	0	0	0	0	0	0	0
	854953	855210		+	-	NGK_1049	Hypothetical	hypothetical protein	0	0	0	0	0	0	0
	855706	855987		+	-	NGK_1050	Hypothetical	hypothetical protein	0	0	0	0	0	0	0
	856046	857179		+	-	NGK_1051	Hypothetical	hypothetical protein	0	0	0	0	0	0	0
	857256	857597		+	-	NGK_1052	Hypothetical	hypothetical protein	0	0	0	0	0	0	0
	857833	858414		+	-	NGK_1053	Hypothetical	hypothetical protein	0	0	0	0	0	0	0
	858506	859021		+	-	NGK_1054	Hypothetical	hypothetical protein	0	0	0	0	0	0	0
	859230	859355		+	-	NGK_1055	Hypothetical	hypothetical protein	0	0	0	0	0	0	0
	859484	860371		+	-	NGK_1056	Hypothetical	hypothetical protein	0	0	0	0	0	0	0
	860460	860924		+	-	NGK_1057	Hypothetical	hypothetical protein	0	0	0	0	0	0	0
	861328	861639		+	-	NGK_1058	Hypothetical	hypothetical protein	0	0	0	0	0	0	0
	861911	862090		+	-	NGK_1059	Hypothetical	hypothetical protein	0	0	0	0	0	0	0
	862205	863275		+	-	NGK_1060	Hypothetical	hypothetical protein	0	0	0	0	0	0	0
	863328	863942		+	-	NGK_1061	Hypothetical	hypothetical protein	0	0	0	0	0	0	0
	863997	864359		+	-	NGK_1062	Hypothetical	hypothetical protein	0	0	0	0	0	0	0
	864563	865150		+	-	NGK_1063	Stress	CspA protein	0	0	0	0	0	0	0
	865275	865520		+	-	NGK_1064	Hypothetical	hypothetical protein	0	0	0	0	0	0	0
	865735	865577		-	-	NGK_1065	Hypothetical	hypothetical protein	0	0	0	0	0	0	0
	865996	865739		-	-	NGK_1066	Phage Associated	AtlA protein	0	0	0	0	0	0	0
	869328	866326		-	-	NGK_1067	DNA Metabolism	protein TraG	0	0	0	0	0	0	0
	870693	869335		-	-	NGK_1068	DNA Metabolism	protein TraH	0	0	0	0	0	0	0
	871794	871018		-	-	NGK_1069	DNA Metabolism	protein TraF	0	0	0	0	0	0	0
	872231	871806		-	-	NGK_1070	Hypothetical	hypothetical protein	0	0	0	0	0	0	0
	873471	872218		-	-	NGK_1071	DNA Metabolism	protein TraN	0	0	0	0	0	0	0
	875042	873798		-	-	NGK_1072	Hypothetical	hypothetical protein	0	0	0	0	0	0	0
	875794	875039		-	-	NGK_1073	Other	protein TrbC	0	0	0	0	0	0	0
	876924	875806		-	-	NGK_1074	DNA Metabolism	protein TraU	0	0	0	0	0	0	0
	877577	876921		-	-	NGK_1075	DNA Metabolism	protein TraW	0	0	0	0	0	0	0
	878131	877586		-	-	NGK_1076	Other	protein TrbI	0	0	0	0	0	0	0
	878679	878131		-	-	NGK_1077	Hypothetical	hypothetical protein	0	0	0	0	0	0	0
	881283	878707		-	-	NGK_1078	DNA Metabolism	protein TraC	0	0	0	0	0	0	0
	881898	881293		-	-	NGK_1079	DNA Metabolism	protein TraV	0	0	0	0	0	0	0
	882431	881871		-	-	NGK_1080	Metabolism	protein DsbC	0	0	0	0	3	0	0
	883913	882600		-	-	NGK_1081	DNA Metabolism	protein TraB	0	0	0	0	0	0	0
	884472	883915		-	-	NGK_1082	DNA Metabolism	protein TraK	0	0	0	0	0	0	0
	885301	884651		-	-	NGK_1083	DNA Metabolism	protein TraE	0	0	0	0	0	0	0
	885594	885313		-	-	NGK_1084	DNA Metabolism	protein TraL	0	0	0	0	0	0	0
	885840	885616		-	-	NGK_1085	Pilin	TraA protein	0	0	0	0	0	0	0
	886489	885968		-	-	NGK_1086	Hypothetical	hypothetical protein	0	0	0	0	0	0	0
	886920	886459		-	-	NGK_1087	Other	protein LtgX	0	0	0	0	0	0	0
	887431	887850		+	-	NGK_1088	Hypothetical	hypothetical protein	0	0	0	0	0	0	0
	887847	890399		+	-	NGK_1089	Pilin	TraI	0	0	0	0	0	0	0
	890396	892438		+	-	NGK_1090	DNA Metabolism	protein TraD	0	0	0	0	0	0	0
	892545	893123		+	-	NGK_1091	DNA Metabolism	protein TraD	0	0	0	0	0	0	0
	893523	893344		-	-	NGK_1092	Hypothetical	hypothetical protein	0	0	175	12	40	6	0
	894080	893568		-	-	NGK_1093	Membrane	Periplasmic protein	111	0	49	32	24	42	17
	894446	894171		-	-	NGK_1094	Hypothetical	hypothetical protein	20	0	0	75	42	83	0
	896475	894553		-	-	NGK_1095	Transport	ABC transporter ATP-binding protein	38	12	12	35	36	39	51
	896923	896552		-	-	NGK_1096	Hypothetical	hypothetical protein	12	0	57	41	75	72	49
	897032	898426		+	-	NGK_1097	Metabolism	homoserine dehydrogenase	15	53	78	93	81	78	50
	898419	898853		+	-	NGK_1098	Membrane	Membrane protein	9	63	42	26	88	152	43
899318	899298	899029	899029	-	-	NGK_1099	Regulator	protein DbhA	1301	1091	722	3655	3511	3869	3383
	899332	899490		+	-	NGK_1100	Hypothetical	hypothetical protein	0	0	0	0	0	6	0
	901942	899480	899480	-	-	NGK_1101	Hypothetical	hypothetical protein	136	144	91	57	538	261	92
	902634	902065		-	-	NGK_1102	Hypothetical	hypothetical protein	0	0	41	18	20	1	6
	903783	902782		-	-	NGK_1103	Hypothetical	hypothetical protein	13	0	30	22	33	23	21
	903770	904177		+	-	NGK_1104	Hypothetical	hypothetical protein	0	0	0	0	0	0	0
	904219	904398		+	-	NGK_1105	Hypothetical	hypothetical protein	0	0	0	0	7	0	0
	906248	904470		-	-	NGK_1106	DNA Metabolism	recombinase D	34	16	30	57	45	52	30
	906977	906282		-	-	NGK_1107	Lipoprotein	protein LolD	55	19	0	94	35	42	71
	908217	906970		-	-	NGK_1108	Lipoprotein	protein LolC	18	72	0	70	85	52	77
	908384	908205		-	-	NGK_1109	Hypothetical	hypothetical protein	0	0	0	2	1	11	13
	908443	908721		+	-	NGK_1110	Hypothetical	hypothetical protein	159	0	41	225	267	187	355
	909397	908777		-	recR	NGK_1111	DNA Metabolism	recombination protein RecR	37	0	0	46	44	16	51
910999	910999	909461		-	-	NGK_1112	Metabolism	putative peptidyl-prolyl cis-trans isomerase	125	194	81	232	160	127	125
	911422	911048		-	-	NGK_1113	Hypothetical	hypothetical protein	0	62	0	72	63	35	13
911398	911398	913200		+	-	NGK_1114	Transport	putative ABC-transporter, ATP-binding protein	123	13	61	135	235	403	184
	913279	914511		+	cca	NGK_1115	Metabolism	multifunctional tRNA nucleotidyl transferase/2'3'-cyclic phosphodiesterase/2'nucleotidase/phosphatase	71	34	21	27	59	27	71
	914660	914842		+	-	NGK_1116	Hypothetical	hypothetical protein	0	0	0	5	0	0	0
	914930	915238		+	-	NGK_1117	Hypothetical	hypothetical protein	78	0	88	18	26	9	12
	915320	916351		+	ruvB	NGK_1118	DNA Metabolism	Holliday junction DNA helicase RuvB	64	0	0	11	6	15	5
	917279	916596		-	-	NGK_1119	Metabolism	putative ribulose-phosphate 3-epimerase	14	34	107	415	125	94	75
	917293	917859		+	-	NGK_1120	Membrane	Periplasmic protein	11	0	0	38	36	103	8
	918735	917872		-	-	NGK_1121	Hypothetical	hypothetical protein	23	0	0	29	12	18	39
	919522	918743		-	-	NGK_1122	Metabolism	riboflavin synthase subunit alpha	0	0	0	90	56	18	73
	920137	919523		-	-	NGK_1123	Metabolism	Probable molybdopterin-guanine dinucleotide biosynthesis protein A	7	65	43	29	28	3	16
	920344	922113		+	-	NGK_1124	Regulator	NarX/NarQ	14	0	20	18	6	19	18
	922110	922766		+	-	NGK_1125	Regulator	NarL/NarP	8	41	0	13	4	4	0
	923776	922922		-	-	NGK_1126	Hypothetical	hypothetical protein	9	0	0	14	6	8	0
	924304	923993		-	-	NGK_1127	Transposase	IS1016 transposase	14	0	0	3	46	10	0
924718	924718	924837		+	-	NGK_1128	Hypothetical	hypothetical protein	72	0	155	108	273	88	86
	924947	925540		+	-	NGK_1129	Hypothetical	hypothetical protein	13	0	0	16	27	21	17
	926237	925752		-	-	NGK_1130	Metabolism	phosphoribosylaminoimidazole carboxylase catalytic subunit	0	33	0	37	13	14	6
	926998	926285		-	-	NGK_1131	Hypothetical	hypothetical protein	7	0	0	22	31	90	16
	927666	926998		-	-	NGK_1132	Metabolism	putative O-methyltransferase	109	0	0	92	71	86	25
	927862	927677		-	-	NGK_1133	Hypothetical	hypothetical protein	139	0	147	402	220	384	111
	928006	929982		+	mutL	NGK_1134	DNA Metabolism	DNA mismatch repair protein	2	10	13	3	7	11	9
	929990	932200		+	-	NGK_1135	Replication	DNA polymerase III subunits gamma and tau	8	24	21	7	22	9	17
	932281	932616		+	-	NGK_1136	Hypothetical	hypothetical protein	0	0	113	64	64	48	60
	932876	932754		-	-	NGK_1137	DNA Metabolism	type I restriction-modification system, M subunit	0	0	0	0	0	0	0
934315	934315	933269	933242	-	recA	NGK_1138	DNA Metabolism	recombinase A	603	53	131	282	640	872	680
	934515	935279		+	aroD	NGK_1139	Metabolism	3-dehydroquinate dehydratase	25	0	0	9	19	21	17
	935299	937314		+	-	NGK_1140	DNA Metabolism	putative ATP-dependent DNA helicase	12	12	13	9	17	15	2
	938490	937384		-	-	NGK_1141	Replication	DNA polymerase IV	58	18	24	12	22	24	9
	938754	939050		+	-	NGK_1142	Hypothetical	hypothetical protein	1	0	0	8	23	51	0
	939342	940121		+	-	NGK_1143	Energy Metabolism	putative oxidoreductase	13	19	0	9	14	82	24
	940330	941400		+	-	NGK_1144	Phage Associated	putative phage integrase	0	0	0	0	2	15	0
941629	941629	941892	941892	+	-	NGK_1145	Phage Associated	putative phage associated protein	1462	1063	1343	1717	3551	5991	12073
	941929	942213		+	-	NGK_1146	Phage Associated	putative phage associated protein	76	107	26	81	51	69	37
	942235	942888		+	-	NGK_1147	Transposase	IS1016 transposase	0	2	0	6	31	15	31
	942916	943155		+	-	NGK_1148	Phage Associated	putative phage associated protein	77	56	106	53	93	47	0
	943128	943250		+	-	NGK_1149	Host Interactions	mucin TcMUCII	0	12	0	0	7	0	0
	943340	943546		+	-	NGK_1150	Other	P97	0	0	0	0	0	2	0
	943646	943840		+	-	NGK_1151	Phage Associated	Phage baseplate assembly protein V	0	0	0	0	0	0	0
	943837	944163		+	-	NGK_1152	Phage Associated	putative phage associated protein	0	0	0	0	0	0	0
	944184	944978		+	-	NGK_1153	Iron	Putative baseplate protein phage associated protein	0	0	0	0	0	2	0
	945069	945632		+	-	NGK_1154	Other	polyprotein	0	0	0	0	0	0	0
	945672	945974		+	-	NGK_1155	Phage Associated	bacteriophage tail fiber protein	0	0	0	0	0	0	0
	946516	945971		-	-	NGK_1156	Metabolism	keratin 2a	0	0	0	0	0	0	18
	946609	947859		+	-	NGK_1157	Other	putative tail fiber protein	0	0	0	0	0	0	0
	947971	948300		+	-	NGK_1158	Phage Associated	putative phage associated protein	0	0	0	0	0	0	0
	948627	948316		-	-	NGK_1159	DNA Metabolism	Plasmid maintenance system antidote protein, XRE family	0	0	0	0	12	27	0
	948917	948624		-	-	NGK_1160	DNA Metabolism	plasmid maintenance system killer protein	0	0	0	0	12	0	10
	948999	949436		+	-	NGK_1161	Hypothetical	hypothetical protein	0	0	0	0	0	0	0
	949439	949612		+	-	NGK_1162	Hypothetical	hypothetical protein	0	0	0	0	0	0	10
	949636	949758		+	-	NGK_1163	Hypothetical	hypothetical protein	0	0	0	0	0	40	3
	950026	949763		-	-	NGK_1164	Hypothetical	hypothetical protein	0	0	0	0	0	3	0
	950502	950074		-	-	NGK_1165	Phage Associated	putative phage associated protein	11	0	0	8	48	11	0
	950702	950562		-	-	NGK_1166	Phage Associated	putative phage associated protein	0	0	0	4	62	66	0
	951760	950747		-	-	NGK_1167	Phage Associated	putative phage associated protein	16	28	0	9	70	42	61
	951963	951760		-	-	NGK_1168	Phage Associated	putative phage associated protein	77	0	0	0	10	7	0
	953623	951977		-	pgi	NGK_1169	Metabolism	glucose-6-phosphate isomerase	30	13	16	21	30	52	9
	953714	953845		+	-	NGK_1170	Hypothetical	hypothetical protein	0	0	0	0	0	0	0
	954733	953849		-	-	NGK_1171	Regulator	putative RpiR-family transcriptional regulator	26	34	0	44	76	64	35
	955732	954746		-	glk	NGK_1172	Metabolism	glucokinase	90	24	57	84	87	61	78
	956408	955713		-	-	NGK_1173	Metabolism	6-phosphogluconolactonase	253	0	99	298	264	336	123
	958004	956559		-	-	NGK_1174	Metabolism	glucose-6-phosphate 1-dehydrogenase	45	67	69	149	128	103	38
	957995	958111		+	-	NGK_1175	Hypothetical	hypothetical protein	0	0	0	0	0	24	0
	958524	960359		+	-	NGK_1176	Metabolism	phosphogluconate dehydratase	73	71	138	71	135	173	182
	960569	961207		+	-	NGK_1177	Metabolism	keto-hydroxyglutarate-aldolase/keto-deoxy-phosphogluconate aldolase	132	49	149	47	48	71	57
	961581	961396		-	-	NGK_1178	Hypothetical	hypothetical protein	0	0	0	0	0	0	0
	962842	961802		-	-	NGK_1179	Metabolism	alcohol dehydrogenase	6	0	0	11	6	6	0
	963005	964045		+	-	NGK_1180	Metabolism	putative adenine glycosylase	4	22	0	16	7	4	0
	964099	964227		+	-	NGK_1181	Hypothetical	hypothetical protein	0	0	76	53	68	59	0
	964208	964378		+	-	NGK_1182	Hypothetical	hypothetical protein	0	0	147	16	76	42	0
	964475	964636	964636	+	-	NGK_1183	Hypothetical	hypothetical protein	57	0	0	206	44	43	43
	965835	964807		-	-	NGK_1184	Iron	putative hemolysin activation protein HecB	23	26	0	5	7	24	9
	966663	965866		-	-	NGK_1185	Iron	putative hemolysin activation protein HecB	0	0	0	0	22	35	7
	966934	966701		-	-	NGK_1186	Iron	hemagglutinin/hemolysin-like protein	0	0	0	0	0	0	0
	967405	966959		-	-	NGK_1187	Iron	hemagglutinin/hemolysin-like protein	0	0	0	2	8	0	0
	967727	967476		-	-	NGK_1188	Iron	hemagglutinin/hemolysin-like protein	0	0	0	0	8	0	0
	972039	968569		-	-	NGK_1189	Iron	hemagglutinin/hemolysin-like protein	8	0	0	9	13	15	3
	972841	972050		-	-	NGK_1190	Iron	hemagglutinin/hemolysin-like protein	0	0	0	1	15	0	0
	973638	973498		-	-	NGK_1191	Hypothetical	hypothetical protein	0	0	0	0	13	0	0
	973817	973689		-	-	NGK_1192	Hypothetical	hypothetical protein	0	0	0	0	0	0	0
	973486	973274		-	-	NGK_1193	Hypothetical	hypothetical protein	0	0	0	0	0	0	0
	974128	975219		+	-	NGK_1194	Metabolism	bifunctional 3,4-dihydroxy-2-butanone 4-phosphate synthase/GTP cyclohydrolase II-like protein	10	0	24	32	29	17	29
	975385	975254		-	-	NGK_1195	Hypothetical	hypothetical protein	0	0	0	0	0	0	0
	975519	975382		-	-	NGK_1196	Transport	ABC transporter	0	0	0	0	0	0	0
	977131	975530		-	-	NGK_1197	Hypothetical	hypothetical protein	5	9	18	19	53	32	6
	978037	977198		-	-	NGK_1198	Hypothetical	hypothetical protein	0	32	0	26	38	38	0
	979803	978601		-	-	NGK_1199	Hypothetical	hypothetical protein	0	23	0	11	20	24	0
	980083	979850		-	-	NGK_1200	Hypothetical	hypothetical protein	0	0	0	37	79	89	0
	983158	980132		-	-	NGK_1201	DNA Metabolism	putative type I restriction enzyme	11	9	0	16	28	33	10
	984567	983257		-	-	NGK_1202	DNA Metabolism	recombination factor protein RarA	24	38	0	15	20	16	4
	984925	985815	985815	+	-	NGK_1203	Hypothetical	hypothetical protein	42	33	0	121	84	123	128
	985829	986398		+	-	NGK_1204	Hypothetical	hypothetical protein	43	86	48	199	194	236	148
	986400	986519		+	-	NGK_1205	Hypothetical	hypothetical protein	0	0	0	78	5	6	0
	986516	988120		+	-	NGK_1206	Hypothetical	hypothetical protein	30	34	9	173	177	188	183
	988117	988275		+	-	NGK_1207	Hypothetical	hypothetical protein	0	180	0	95	47	81	56
	988409	988296		-	-	NGK_1208	Hypothetical	hypothetical protein	0	0	0	0	0	0	0
	988908	988648		-	-	NGK_1209	Regulator	putative lysR-family transcriptional regulator	0	0	0	22	14	22	0
	989564	988965		-	-	NGK_1210	Regulator	putative lysR-family transcriptional regulator	30	0	0	51	41	37	16
	989681	990097		+	-	NGK_1211	Membrane	membrane protein	0	0	0	2	3	1	0
	990079	990585		+	-	NGK_1212	Membrane	putative integral membrane protein	76	0	57	11	11	21	10
	990613	991104		+	-	NGK_1213	Membrane	membrane protein	42	0	0	14	29	20	44
	991107	991283		+	-	NGK_1214	Membrane	membrane protein	43	0	0	0	66	0	13
	991443	991315		-	-	NGK_1215	Hypothetical	hypothetical protein	0	0	0	0	0	0	0
991534	991534	991902	991902	+	-	NGK_1216	Lipoprotein	Lipoprotein	172	155	74	181	323	270	39
	991918	993384		+	-	NGK_1217	Amino Acid Metabolism	threonine synthase	77	28	29	100	82	65	79
	993431	994225		+	-	NGK_1218	Hypothetical	hypothetical protein	91	36	31	34	84	17	18
	994413	995189		+	-	NGK_1219	Energy Metabolism	putative ferredoxin-NADP reductase	168	68	203	403	161	146	72
	995666	995532		-	-	NGK_1220	Hypothetical	hypothetical protein	0	0	0	17	9	34	0
	998319	995848		-	-	NGK_1221	Transport	putative P-type cation-transporting ATPase	14	8	22	10	21	13	17
	999494	998316		-	-	NGK_1222	Metabolism	GTP-binding protein	25	23	1	29	41	15	23
	1000804	999500		-	-	NGK_1223	Membrane	Periplasmic protein	48	0	36	24	42	52	16
	1001657	1000932		-	-	NGK_1224	Hypothetical	hypothetical protein	52	29	0	13	37	62	32
	1002407	1001730		-	radC	NGK_1225	DNA Metabolism	DNA repair protein RadC	11	0	0	8	12	41	2
	1003879	1002530		-	-	NGK_1226	Metabolism	glutamate--cysteine ligase	55	18	37	128	66	44	10
	1004131	1005540	1005540	+	-	NGK_1227	Metabolism	isopropylmalate isomerase large subunit	131	26	69	111	174	126	98
	1005635	1005889	1005889	+	-	NGK_1228	Lipoprotein	Lipoprotein	157	0	23	176	129	71	33
	1005900	1006592		+	leuD	NGK_1229	Metabolism	isopropylmalate isomerase small subunit	124	0	0	79	64	44	6
	1006759	1008030		+	-	NGK_1230	DNA Metabolism	putative DNA modification methylase (N.MgoV)	28	37	11	82	59	83	31
	1008046	1008777		+	-	NGK_1231	DNA Metabolism	putative type II restriction endonuclease NlaIV	19	22	9	36	52	71	23
	1008811	1009881		+	-	NGK_1232	Metabolism	3-isopropylmalate dehydrogenase	63	49	0	54	58	97	63
	1010562	1009909		-	-	NGK_1233	Transposase	IS1016 transposase	27	0	0	3	7	2	0
	1010619	1010786		+	-	NGK_1234	Hypothetical	hypothetical protein	0	0	0	16	35	0	0
	1011653	1010868		-	-	NGK_1235	Metabolism	protein SuhB	27	27	0	12	45	29	54
	1011669	1011797		+	-	NGK_1236	Hypothetical	hypothetical protein	0	0	0	0	6	0	0
	1011897	1012712		+	-	NGK_1237	Metabolism	putative methylase family protein	16	0	0	2	17	23	4
	1012774	1013622		+	-	NGK_1238	Hypothetical	hypothetical protein	6	0	0	12	20	33	0
	1013658	1014914		+	-	NGK_1239	Metabolism	putative SUN-family protein	40	17	0	0	33	45	34
	1014921	1015115		+	-	NGK_1240	Hypothetical	hypothetical protein	0	0	0	2	6	10	0
	1015260	1015688		+	-	NGK_1241	Hypothetical	hypothetical protein	45	66	0	76	40	33	15
	1017080	1015737		-	-	NGK_1242	Metabolism	putative aldehyde dehydrogenase	77	21	0	61	46	28	51
	1017831	1017085		-	-	NGK_1243	Hypothetical	hypothetical protein	154	71	37	84	86	17	50
	1017888	1018178		+	gatC	NGK_1244	Translation	aspartyl/glutamyl-tRNA amidotransferase subunit C	177	156	19	321	325	509	311
	1018241	1019686		+	gatA	NGK_1245	Translation	aspartyl/glutamyl-tRNA amidotransferase subunit A	48	67	33	30	43	100	31
	1019683	1020615		+	-	NGK_1246	Hypothetical	Hypothetical membrane protein	50	11	21	43	65	63	25
	1020658	1022088		+	gatB	NGK_1247	Translation	aspartyl/glutamyl-tRNA amidotransferase subunit B	81	43	8	83	97	96	49
	1022180	1023190		+	-	NGK_1248	Energy Metabolism	putative iron/sulfur-binding oxidoreductase	42	24	0	2	24	16	0
	1023323	1023171		-	-	NGK_1249	Hypothetical	hypothetical protein	0	0	0	35	0	21	14
	1023952	1023320		-	-	NGK_1250	Metabolism	pyridoxamine 5'-phosphate oxidase	143	0	79	119	34	29	4
	1023972	1025222		+	-	NGK_1251	Metabolism	pseudouridine synthase	36	0	22	23	35	17	23
	1026822	1025281		-	-	NGK_1252	Transport	putative membrane transporter	0	0	17	9	20	1	12
	1026904	1027026		+	-	NGK_1253	Hypothetical	hypothetical protein	0	0	0	0	0	0	0
	1028524	1027115		-	xseA	NGK_1254	DNA Metabolism	exodeoxyribonuclease VII large subunit	27	9	0	6	26	10	23
	1028649	1029488		+	-	NGK_1255	Metabolism	putative NH(3)-dependent NAD synthetase	27	0	0	81	28	14	0
	1030032	1029559		-	-	NGK_1256	Regulator	Regulator of cell morphogenesis and NO signaling	0	50	0	25	31	12	0
	1030062	1030265		+	-	NGK_1257	Hypothetical	hypothetical protein	0	0	0	0	0	4	0
1030273	1030273	1030662	1030662	+	-	NGK_1258	Energy Metabolism	putative thioredoxin I	143	69	70	215	169	107	100
1031826	1031826	1031948	1031948	+	-	NGK_1259	Hypothetical	hypothetical protein	525	9	43	203	831	835	343
	1031661	1030714		-	-	NGK_1260	Hypothetical	hypothetical protein	0	9	22	8	27	9	25
	1031989	1033377	1033377	+	-	NGK_1261	Replication	putative ATP-dependent RNA helicase	300	80	182	158	569	450	493
	1033928	1033728		-	-	NGK_1262	Hypothetical	hypothetical protein	0	0	93	30	2	13	10
	1034559	1033942		-	-	NGK_1263	Membrane	Membrane lipoprotein	45	74	22	101	58	35	42
	1035081	1034581		-	-	NGK_1264	Hypothetical	hypothetical protein	0	55	0	15	13	9	21
	1035080	1035235		+	-	NGK_1265	Hypothetical	hypothetical protein	0	0	0	0	0	0	0
	1035262	1035387		+	-	NGK_1266	Hypothetical	hypothetical protein	0	0	0	0	0	0	0
	1035486	1036679		+	argD	NGK_1267	Metabolism	bifunctional N-succinyldiaminopimelate-aminotransferase/acetylornithine transaminase protein	33	0	21	50	22	17	8
	1038114	1036786	1036786	-	clpX	NGK_1268	Metabolism	ATP-dependent protease ATP-binding subunit ClpX	59	85	62	264	101	66	81
1038213	1038213	1038584	1038584	+	rbfA	NGK_1269	Translation	ribosome-binding factor A	90	71	93	152	196	55	89
	1038595	1039119		+	-	NGK_1270	Hypothetical	hypothetical protein	12	54	0	36	111	70	68
	1039177	1040097		+	truB	NGK_1271	Translation	tRNA pseudouridine synthase B	0	28	0	11	14	10	7
	1040315	1040815		+	-	NGK_1272	DNA Metabolism	restriction modification protein Mod	8	33	0	7	75	63	84
	1041136	1042509		+	-	NGK_1273	Amino Acid Metabolism	Twin-argninine leader-binding protein DmsD	3	0	20	29	69	72	102
	1042499	1045273		+	-	NGK_1274	Other	protein Rmsprotein R	8	28	17	25	45	29	36
	1046594	1045422	1045422	-	-	NGK_1275	Metabolism	putative L-lactate dehydrogenase	288	243	79	429	269	269	150
	1046945	1046715		-	-	NGK_1276	Hypothetical	hypothetical protein	0	0	0	0	0	0	0
	1046944	1047390		+	-	NGK_1277	Regulator	Putative HTH-type transcriptional regulator NMB1378	260	62	0	19	31	35	65
	1047419	1048633		+	-	NGK_1278	Metabolism	cysteine desulfurase	147	13	66	52	102	137	35
	1048672	1048929		+	-	NGK_1279	Hypothetical	hypothetical protein	0	0	173	112	71	116	112
	1049235	1049729		+	-	NGK_1280	Replication	cell filamentation protein	38	57	0	119	58	141	81
	1049742	1050128		+	-	NGK_1281	Replication	scaffold protein	150	0	71	103	151	122	65
1050155	1050155	1050535	1050535	+	-	NGK_1282	Metabolism	HesB/YadR/YfhF family protein	92	0	72	180	179	192	43
	1050798	1051298		+	-	NGK_1283	Stress	chaperone protein HscB	16	0	0	0	13	34	35
	1051425	1051312		-	-	NGK_1284	Hypothetical	hypothetical protein	0	0	0	0	3	0	0
	1051396	1054146		+	-	NGK_1285	DNA Metabolism	DNA gyrase subunit A	76	53	70	77	96	77	56
	1054676	1054365		-	-	NGK_1286	Transposase	IS1016 transposase	13	0	0	2	6	0	0
	1055240	1057246		+	-	NGK_1287	Hypothetical	hypothetical protein	28	5	13	16	28	29	28
	1058397	1057369		-	-	NGK_1288	Metabolism	putative murein hydrolase	4	0	0	31	71	48	49
	1058617	1058369		-	-	NGK_1289	Hypothetical	hypothetical protein	42	38	0	10	154	5	53
	1059999	1058608		-	-	NGK_1290	Energy Metabolism	putative oxidoreductase	29	22	18	26	68	37	1
	1059998	1060186		+	-	NGK_1291	Hypothetical	hypothetical protein	0	0	0	0	0	0	0
	1060220	1063924		+	-	NGK_1292	DNA Metabolism	putative transcription-repair coupling factor	19	7	16	12	24	13	15
	1063997	1064116		+	-	NGK_1293	Hypothetical	hypothetical protein	0	239	0	0	12	0	0
	1064150	1064452		+	-	NGK_1294	Hypothetical	hypothetical protein	0	0	0	7	8	0	0
1064614	1064614	1064997	1064997	+	-	NGK_1295	Metabolism	aspartate alpha-decarboxylase	182	149	143	218	240	151	188
	1065019	1065861		+	-	NGK_1296	Metabolism	2-dehydro-3-deoxyphosphooctonate aldolase	86	59	0	65	130	41	61
	1065876	1066316		+	-	NGK_1297	Hypothetical	hypothetical protein	59	40	107	46	115	95	87
	1066363	1067649	1067649	+	eno	NGK_1298	Metabolism	phosphopyruvate hydratase	159	117	165	221	310	241	140
	1067817	1068095		+	-	NGK_1299	Replication	Cell division protein ftsB-like protein	116	0	61	57	108	72	38
	1068369	1068136		-	-	NGK_1300	Iron	Iron-sulfur binding protein	0	0	0	45	38	0	0
	1069680	1068547	1068547	-	nrdB	NGK_1301	Metabolism	ribonucleotide-diphosphate reductase subunit beta	39	45	99	171	78	76	46
	1072287	1069993	1069993	-	-	NGK_1302	Metabolism	ribonucleotide-diphosphate reductase subunit alpha	87	91	131	183	128	170	80
	1072618	1072505		-	-	NGK_1303	Hypothetical	hypothetical protein	0	0	0	0	0	0	0
	1072803	1073114		+	-	NGK_1304	Hypothetical	hypothetical protein	0	0	0	93	150	106	82
	1074144	1073377		-	-	NGK_1305	Metabolism	1-acyl-sn-glycerol-3-phosphate acyltransferase	55	14	68	45	47	15	39
	1075122	1074232		-	-	NGK_1306	Metabolism	formamidopyrimidine-DNA glycosylase	10	0	10	86	38	19	7
	1075777	1075112		-	-	NGK_1307	Hypothetical	hypothetical protein	84	19	38	129	51	31	15
	1075956	1077932		+	-	NGK_1308	Metabolism	Membrane-bound lytic murein transglycosylase D	106	40	55	78	78	175	41
	1078000	1078692		+	-	NGK_1309	Translation	Ribosomal small subunit pseudouridine synthase A	52	0	37	22	31	69	18
	1079166	1080536		+	-	NGK_1310	Transport	putative sodium-dependent transport protein	8	0	25	58	12	11	0
	1080550	1081425		+	-	NGK_1311	Metabolism	putative cytidylate kinase	45	20	61	26	19	22	16
	1081535	1081422		-	-	NGK_1312	Hypothetical	hypothetical protein	0	0	0	0	0	0	0
1081496	1081509	1083263	1083263	+	rpsA	NGK_1313	Translation	30S ribosomal protein S1	664	687	517	683	1797	2221	2010
1083291	1083292	1083570	1083570	+	ihfB	NGK_1314	Regulator	integration host factor subunit beta	718	549	294	627	958	654	732
	1084191	1083784		-	-	NGK_1315	Regulator	putative MerR-family transcriptional regulator	0	0	0	2	0	3	20
	1084692	1085042		+	-	NGK_1316	Metabolism	alcohol dehydrogenase	0	0	0	158	46	40	34
	1085047	1085451		+	-	NGK_1317	Metabolism	alcohol dehydrogenase	0	0	0	89	49	57	30
	1085460	1086287		+	-	NGK_1318	Metabolism	putative esterase	23	0	0	35	29	26	0
	1086817	1087968		+	-	NGK_1319	Metabolism	Nucleotide-binding protein	36	0	43	54	42	142	52
	1088027	1088452		+	ndk	NGK_1320	Metabolism	nucleoside diphosphate kinase	33	0	0	216	72	64	26
	1088449	1088580		+	-	NGK_1321	Hypothetical	hypothetical protein	0	0	0	99	54	51	17
1088596	1088596	1089690		+	-	NGK_1322	Hypothetical	hypothetical protein	81	46	0	159	164	204	97
	1089741	1090454		+	-	NGK_1323	Pilin	Ftype IV pilus assembly protein	17	80	76	21	114	94	75
	1090470	1091735		+	ispG	NGK_1324	Metabolism	4-hydroxy-3-methylbut-2-en-1-yl diphosphate synthase	50	0	42	47	67	78	16
1092418	1092418	1091789		-	clpP	NGK_1325	DNA Metabolism	ATP-dependent Clp protease proteolytic subunit	74	45	0	162	160	199	78
	1093812	1092499		-	tig	NGK_1326	Translation	trigger factor	244	215	351	970	937	818	494
	1094034	1094483		+	-	NGK_1327	Transposase	IS1106 transposase	60	0	0	66	2	11	0
	1097120	1094682		-	-	NGK_1328	Replication	cell division protein FtsK	43	0	46	45	56	37	48
	1097180	1098553		+	-	NGK_1329	Transport	ABC transporter permease	15	0	0	6	31	19	30
	1099082	1098600	1098600	-	-	NGK_1330	Hypothetical	hypothetical protein	101	91	146	168	151	107	55
	1099246	1099389		+	-	NGK_1331	Hypothetical	hypothetical protein	0	0	0	0	0	0	0
	1099407	1099610		+	-	NGK_1332	Hypothetical	hypothetical protein	0	0	0	0	0	0	0
	1099665	1100411		+	-	NGK_1333	Metabolism	phosphatidylserine synthase	87	0	71	32	101	19	38
	1100412	1101218		+	-	NGK_1334	Hypothetical	hypothetical protein	47	0	77	24	26	11	5
1101500	1101488	1101315	1101315	-	-	NGK_1335	Hypothetical	hypothetical protein	447	2	0	71	294	40	63
1101827	1101827	1101696	1101696	-	-	NGK_1336	Hypothetical	hypothetical protein	32	0	0	59	70	354	72
	1102293	1101841		-	rplI	NGK_1337	Translation	50S ribosomal protein L9	101	592	242	470	509	551	407
	1102540	1102310	1102310	-	rpsR	NGK_1338	Translation	30S ribosomal protein S18	58	503	112	1185	2249	2022	1650
	1102849	1102547	1102547	-	-	NGK_1339	Replication	putative primosomal replication protein n	96	11	36	468	275	317	191
	1103158	1102850		-	rpsF	NGK_1340	Translation	30S ribosomal protein S6	91	0	229	445	355	337	458
1104324	1104324	1103374		-	-	NGK_1341	Energy Metabolism	putative thioredoxin reductase	203	60	248	167	256	259	124
	1104340	1106640		+	-	NGK_1342	Transport	putative transport ATPase	17	10	0	27	37	20	14
	1106695	1108581		+	uvrC	NGK_1343	DNA Metabolism	excinuclease ABC subunit C	10	14	14	6	20	13	7
	1109084	1110037		+	-	NGK_1344	Hypothetical	hypothetical protein	0	0	0	10	14	22	28
	1110084	1110200		+	-	NGK_1345	Hypothetical	hypothetical protein	0	0	0	0	16	58	0
	1110224	1110940		+	trmB	NGK_1346	Translation	tRNA (guanine-N(7)-)-methyltransferase	47	28	0	11	47	39	34
	1111391	1111507		+	-	NGK_1347	Hypothetical	hypothetical protein	0	0	0	2	0	0	0
	1112020	1112778		+	-	NGK_1348	Metabolism	carbonic anhydrase	122	34	80	36	5	55	36
	1114983	1112956		-	-	NGK_1349	DNA Metabolism	excinuclease ABC subunit B	9	0	36	14	31	29	14
1115309	1115309	1115157	1115157	-	-	NGK_1350	Transport	Transposase	0	0	0	235	34	82	71
1116788	1116788	1115313		-	-	NGK_1351	Metabolism	carboxy-terminal processing protease	42	41	45	120	101	81	101
	1118711	1116915		-	-	NGK_1352	Hypothetical	hypothetical protein	54	46	69	101	102	133	92
	1118915	1118784		-	-	NGK_1353	Hypothetical	hypothetical protein	0	0	0	0	30	5	0
	1118966	1119598		+	-	NGK_1354	Lipoprotein	CreA protein	30	0	0	63	43	33	0
	1119600	1120148		+	-	NGK_1355	Hypothetical	hypothetical protein	44	0	50	11	47	58	25
	1120141	1120596		+	-	NGK_1356	DNA Metabolism	Holliday junction resolvase-like protein	124	28	0	6	25	21	0
	1121262	1120606		-	-	NGK_1357	Metabolism	putative hydrolase	8	21	0	6	7	14	5
	1123124	1121325		-	-	NGK_1358	Translation	prolyl-tRNA synthetase	110	83	15	103	134	124	116
	1123734	1126397	1126397	+	aceE	NGK_1359	Metabolism	pyruvate dehydrogenase subunit E1	350	286	146	176	383	567	244
	1126547	1128109		+	-	NGK_1360	Metabolism	dihydrolipoamide acetyltransferase	243	234	93	137	304	516	339
	1128501	1128644		+	-	NGK_1361	Hypothetical	hypothetical protein	121	262	0	621	667	1367	1640
1128662	1128662	1130446	1130446	+	-	NGK_1362	Metabolism	putative dihydrolipoamide dehydrogenase	347	153	54	176	344	268	355
	1132432	1130870	1130870	-	-	NGK_1363	Hypothetical	hypothetical protein	41	53	145	279	242	139	170
	1133738	1132545		-	-	NGK_1364	Iron	putative TonB-dependent receptor protein	49	0	0	6	41	23	39
	1134224	1133841		-	-	NGK_1365	Iron	putative TonB-dependent receptor protein	19	0	0	10	5	24	18
	1134195	1134332		+	-	NGK_1366	Hypothetical	hypothetical protein	0	0	0	0	0	0	0
	1134789	1134478		-	-	NGK_1367	Iron	putative TonB-dependent receptor protein	70	0	45	70	57	32	25
	1135617	1134964		-	-	NGK_1368	Transposase	IS1016 transposase	6	41	0	1	13	4	4
	1135736	1135614		-	-	NGK_1369	Hypothetical	hypothetical protein	0	0	0	0	0	0	0
	1135818	1136378		+	-	NGK_1370	Membrane	Periplasmic protein	43	0	46	31	13	24	17
	1136442	1136579		+	-	NGK_1371	Hypothetical	hypothetical protein	0	0	0	40	4	32	0
	1136607	1138052		+	aspA	NGK_1372	Metabolism	aspartate ammonia-lyase	101	19	38	22	90	102	45
	1139610	1138120		-	-	NGK_1373	Hypothetical	hypothetical protein	3	15	18	6	2	0	0
	1139731	1139850		+	-	NGK_1374	Hypothetical	hypothetical protein	34	0	0	0	35	45	0
	1140687	1139881		-	-	NGK_1375	Hypothetical	hypothetical protein	0	0	0	0	8	21	8
	1144507	1141079		-	-	NGK_1376	Iron	putative TonB-dependent receptor	9	0	0	2	3	3	0
	1145590	1144715		-	-	NGK_1377	Membrane	membrane protein	50	0	0	34	28	9	33
	1146286	1145594		-	-	NGK_1378	Stress	molecuar chaperone DnaJ	22	0	0	20	76	32	53
	1146787	1146308		-	-	NGK_1379	Hypothetical	hypothetical protein	0	0	0	97	51	33	30
	1146796	1147224		+	-	NGK_1380	Hypothetical	hypothetical protein	16	22	0	67	70	28	0
	1147256	1148122		+	-	NGK_1381	Hypothetical	hypothetical protein	43	38	31	50	36	23	2
	1148214	1149173		+	-	NGK_1382	Hypothetical	hypothetical protein	45	58	0	33	31	37	9
	1152206	1149267		-	-	NGK_1383	DNA Metabolism	Type III restriction-modification system EcoPI enzyme, subunit res	2	0	0	8	21	32	22
	1154092	1152296		-	-	NGK_1384	DNA Metabolism	Putative type III restriction-modification system methyltransferase	22	15	17	3	15	21	12
	1155027	1154470		-	-	NGK_1385	Metabolism	putative peptidyl-prolyl cis-trans isomerase A	26	22	0	13	35	35	60
	1156018	1155092		-	-	NGK_1386	Metabolism	CobW-like protein	0	0	23	56	33	26	24
	1156482	1156006		-	-	NGK_1387	Regulator	Cation uptake regulator	44	0	0	92	63	8	74
	1157116	1156559		-	-	NGK_1388	Amino Acid Metabolism	Low molecular weight protein tyrosine-phosphatase	41	51	43	51	38	24	56
	1158071	1157139	1157139	-	-	NGK_1389	Metabolism	glycerate kinase	38	30	29	127	136	127	129
	1159464	1158367		-	-	NGK_1390	Hypothetical	hypothetical protein	26	72	27	64	113	69	37
	1160847	1159546		-	-	NGK_1391	Hypothetical	hypothetical protein	57	46	17	61	71	48	19
	1160883	1161140		+	-	NGK_1392	Hypothetical	hypothetical protein	0	0	0	4	0	12	0
	1161115	1161294		+	-	NGK_1393	Hypothetical	hypothetical protein	0	0	0	0	0	0	0
1161647	1161647	1161273	1161273	-	-	NGK_1394	Transport	Mercury transport periplasmic protein, putative	0	0	32	111	69	44	23
	1161926	1162261		+	-	NGK_1395	Hypothetical	hypothetical protein	0	0	0	0	3	0	0
	1162246	1162986		+	-	NGK_1396	Transport	sugar efflux transporter B	0	0	0	0	0	0	0
	1163135	1162983		-	-	NGK_1397	Hypothetical	hypothetical protein	86	0	0	0	0	5	0
	1163221	1164657		+	-	NGK_1398	Metabolism	protein PacA	8	0	0	0	12	5	7
	1164644	1165651		+	-	NGK_1399	Membrane	protein PacB	6	0	0	3	6	7	2
	1165648	1166841		+	-	NGK_1400	Membrane	Periplasmic protein	8	0	21	1	9	3	0
	1166881	1167081		+	-	NGK_1401	Hypothetical	hypothetical protein	0	0	0	35	31	7	20
	1167092	1168645		+	-	NGK_1402	Metabolism	long-chain-fatty-acid--CoA ligase	37	15	8	17	31	25	31
	1170716	1168734		-	-	NGK_1403	Transport	putative high-affinity choline transport protein	3	0	0	8	11	16	8
	1171548	1170895		-	-	NGK_1404	Transposase	IS1016 transposase	0	0	0	0	9	21	7
	1172530	1172399		-	-	NGK_1405	Hypothetical	hypothetical protein	91	0	0	0	18	17	17
	1173681	1172545		-	-	NGK_1406	Metabolism	phosphoribosylaminoimidazole synthetase	38	20	0	72	61	58	38
	1173820	1174008		+	-	NGK_1407	Hypothetical	hypothetical protein	0	0	0	0	0	0	0
	1174268	1175257		+	-	NGK_1408	DNA Metabolism	putative integrase	0	45	15	45	11	21	9
	1175635	1176078		+	-	NGK_1409	Phage Associated	putative phage associated protein	261	69	323	179	413	378	270
	1179184	1176140		-	-	NGK_1410	Phage Associated	Putative tail length tape measure protein phage associated protein	0	0	0	1	0	1	1
	1179363	1179214		-	-	NGK_1411	Phage Associated	phage associated protein	0	0	0	19	0	0	0
	1179673	1179341		-	-	NGK_1412	Phage Associated	putative phage associated protein	0	0	0	3	0	0	0
	1179848	1179675		-	-	NGK_1413	Hypothetical	hypothetical protein	0	0	0	0	0	0	0
	1180173	1179832		-	-	NGK_1414	Phage Associated	putative phage associated protein	0	0	0	16	0	0	0
	1180315	1180157		-	-	NGK_1415	Phage Associated	putative phage associated protein	0	0	0	39	0	28	0
	1180854	1180315		-	-	NGK_1416	Phage Associated	putative phage associated protein	0	0	48	12	6	0	0
	1181061	1181297		+	-	NGK_1417	Phage Associated	Putative pemI-like protein (PemI) phage associated protein	170	79	0	788	163	27	212
	1181297	1181644		+	-	NGK_1418	Phage Associated	Putative plasmid stable inheritance protein putative phage associated protein	117	116	54	287	62	133	57
	1181818	1181699		-	-	NGK_1419	Hypothetical	hypothetical protein	0	0	0	0	6	24	0
	1182344	1182012		-	-	NGK_1420	Phage Associated	putative phage associated protein	0	0	0	0	0	0	0
	1181979	1181848		-	-	NGK_1421	Hypothetical	hypothetical protein	0	0	0	0	4	0	0
	1182824	1182345		-	-	NGK_1422	Phage Associated	putative phage associated protein	0	0	0	0	0	0	0
	1183191	1182886		-	-	NGK_1423	Phage Associated	phage associated protein	0	0	0	41	8	7	0
	1183318	1183193		-	-	NGK_1424	Hypothetical	hypothetical protein	0	0	0	17	15	0	0
	1187448	1183303		-	-	NGK_1425	Phage Associated	putative phage associated protein	0	0	0	9	1	1	1
1187520	1187520	1187966		+	-	NGK_1426	Phage Associated	putative phage associated protein	281	363	261	665	190	116	164
	1188344	1187994		-	-	NGK_1427	Phage Associated	putative phage associated protein	0	0	0	0	0	2	0
	1189281	1188427		-	-	NGK_1428	Phage Associated	putative phage associated protein	0	0	0	20	4	0	0
	1189877	1189278		-	-	NGK_1429	Phage Associated	putative phage associated protein	0	0	0	1	0	0	11
	1190143	1189877		-	-	NGK_1430	Phage Associated	putative phage associated protein	0	0	0	4	0	9	0
	1190484	1190155		-	-	NGK_1431	Phage Associated	putative phage associated protein	0	0	0	43	0	4	0
	1191318	1190545		-	-	NGK_1432	Phage Associated	putative phage associated protein	0	0	0	9	4	1	0
	1191772	1191344		-	-	NGK_1433	Phage Associated	putative phage associated protein	0	0	0	20	8	0	0
	1192242	1191769		-	-	NGK_1434	Phage Associated	putative phage associated protein	0	0	0	12	2	0	0
	1192781	1192251		-	-	NGK_1435	Phage Associated	putative phage associated protein	0	0	54	16	0	0	7
	1193152	1192784		-	-	NGK_1436	Phage Associated	putative phage associated protein	0	0	0	1	0	0	0
	1194658	1193159		-	-	NGK_1437	Phage Associated	putative phage associated protein	0	0	0	3	3	0	9
	1195856	1194699		-	-	NGK_1438	Phage Associated	putative phage associated protein	0	22	0	11	1	2	0
	1198071	1195924		-	-	NGK_1439	Phage Associated	putative phage associated protein	9	0	0	13	1	1	4
	1199420	1198068		-	-	NGK_1440	Phage Associated	putative phage associated protein	13	0	0	7	3	0	0
	1199871	1199551		-	-	NGK_1441	Phage Associated	putative phage associated protein	0	0	0	41	5	5	1
	1201162	1200293		-	-	NGK_1442	Phage Associated	putative phage associated protein	46	0	0	1	77	87	124
	1202649	1201444		-	-	NGK_1443	Hypothetical	hypothetical protein	52	0	0	0	60	0	66
	1203102	1202695		-	-	NGK_1444	Phage Associated	putative phage associated protein	0	0	67	12	13	4	0
	1203224	1203352		+	-	NGK_1445	Hypothetical	hypothetical protein	0	0	0	0	0	0	0
	1203743	1203369		-	-	NGK_1446	Phage Associated	putative phage associated protein	0	0	0	3	15	0	0
	1204069	1203740		-	-	NGK_1447	Hypothetical	hypothetical protein	0	0	0	7	6	0	0
	1204298	1204050		-	-	NGK_1448	Phage Associated	putative phage associated protein	0	0	0	0	0	3	0
	1204910	1204374		-	-	NGK_1449	Phage Associated	putative phage associated protein	11	49	0	3	25	4	0
	1205189	1204959		-	-	NGK_1450	Phage Associated	putative phage associated protein	0	0	0	4	0	0	0
	1205916	1205182		-	-	NGK_1451	Replication	putative DNA replication protein, putative phage associated protein	0	0	0	4	5	12	0
	1206809	1205973		-	-	NGK_1452	Phage Associated	putative phage associated protein	0	0	0	7	0	0	0
	1206938	1207072		+	-	NGK_1453	Hypothetical	hypothetical protein	0	0	0	0	0	5	0
	1207269	1207069		-	-	NGK_1454	Metabolism	methyl-accepting chemotaxis sensory transducer	0	0	0	0	0	0	0
	1207621	1208307		+	-	NGK_1455	Phage Associated	putative phage repressor	0	0	0	0	0	0	0
	1208347	1209045	1209045	+	-	NGK_1456	Phage Associated	putative CI protein	0	99	64	710	0	0	0
	1209284	1209982		+	-	NGK_1457	Hypothetical	hypothetical protein	0	0	0	0	0	39	31
	1209979	1210797		+	-	NGK_1458	Phage Associated	putative phage associated protein	0	26	0	4	0	130	104
	1210967	1211149		+	-	NGK_1459	Phage Associated	putative phage associated protein	85	209	437	3347	0	1342	1593
	1211251	1211652		+	-	NGK_1460	Phage Associated	putative phage associated protein	35	185	264	1026	0	542	241
	1212512	1211751		-	-	NGK_1461	Hypothetical	hypothetical protein	0	0	0	0	0	25	0
	1212733	1212933		+	-	NGK_1462	Phage Associated	putative phage associated protein	0	0	0	52	24	25	0
	1212966	1213442		+	-	NGK_1463	Phage Associated	putative phage associated protein	9	60	0	21	8	62	11
	1214597	1214133		-	-	NGK_1464	Hypothetical	hypothetical protein	0	0	0	0	0	2	0
	1214627	1214788		+	-	NGK_1465	Phage Associated	putative phage associated protein	0	0	0	31	36	13	15
	1214857	1215543		+	-	NGK_1466	Phage Associated	putative phage associated protein	8	20	0	20	5	33	20
	1215641	1215865		+	-	NGK_1467	Phage Associated	putative phage associated protein	0	0	0	19	0	61	13
	1215862	1216353		+	-	NGK_1468	Phage Associated	putative phage associated protein	0	0	0	15	14	54	8
	1216405	1216620		+	-	NGK_1469	Phage Associated	putative phage associated protein	0	0	0	40	27	23	0
	1216689	1217714		+	-	NGK_1470	Phage Associated	putative phage associated protein	35	0	25	47	27	32	3
	1217735	1217941		+	-	NGK_1471	Hypothetical	hypothetical protein	0	0	0	0	19	20	0
	1217913	1218125		+	-	NGK_1472	Phage Associated	putative phage associated protein	0	0	0	0	0	0	0
	1218151	1218345		+	-	NGK_1473	Phage Associated	putative phage associated protein	0	0	0	11	0	8	0
	1218636	1219310		+	-	NGK_1474	Hypothetical	hypothetical protein	132	37	50	45	67	85	48
	1219297	1219896	1219896	+	ribA	NGK_1475	Metabolism	GTP cyclohydrolase II	163	174	126	163	158	105	78
1220064	1220064	1220264		+	-	NGK_1476	Hypothetical	hypothetical protein	11	0	0	126	218	129	40
	1220249	1221211		+	-	NGK_1477	Hypothetical	hypothetical protein	20	0	0	32	58	40	17
	1222094	1221846		-	-	NGK_1478	Phage Associated	putative phage associated protein	0	0	0	4	27	21	0
	1223354	1222326		-	-	NGK_1479	Phage Associated	putative phage associated protein	29	25	0	19	18	12	6
	1223698	1223408		-	-	NGK_1480	Phage Associated	putative phage associated protein	0	0	0	6	0	17	0
	1225266	1223677		-	-	NGK_1481	Host Interactions	protein TspB2	12	0	0	44	12	39	19
	1225931	1225653		-	-	NGK_1482	Phage Associated	putative phage associated protein	0	0	0	0	11	0	11
	1226222	1225938		-	-	NGK_1483	Phage Associated	putative phage associated protein	0	0	0	10	10	8	0
	1226427	1226230		-	-	NGK_1484	Phage Associated	putative phage associated protein	0	0	0	0	10	0	0
	1226722	1226432		-	-	NGK_1485	Phage Associated	putative phage associated protein	0	0	0	11	5	3	14
	1228119	1226767		-	-	NGK_1486	Hypothetical	hypothetical protein	0	0	0	0	1	0	0
	1228766	1229170		+	-	NGK_1487	Hypothetical	hypothetical protein	33	70	0	3	6	0	0
	1229210	1230391		+	-	NGK_1488	Hypothetical	hypothetical protein	0	9	0	4	6	15	1
	1232721	1230493		-	-	NGK_1489	Energy Metabolism	nitric oxide reductase	10	25	12	12	18	11	84
	1233122	1234300		+	-	NGK_1490	Energy Metabolism	protein AniA	54	10	45	16	28	61	39
	1234478	1235233		+	-	NGK_1491	Hypothetical	hypothetical protein	5	0	32	13	5	11	1
1235506	1235506	1235880	1235880	+	-	NGK_1492	Pilin	pilin	551	61	0	0	188	13	144
	1236041	1236175		+	-	NGK_1493	Other	putative secreted protein	0	0	0	2	0	0	0
1236276	1236276	1236410		+	-	NGK_1494	Hypothetical	hypothetical protein	74	0	127	149	49	184	0
1236525	1236525	1237226		+	-	NGK_1495	Membrane	outer membrane preprotein PIIc	74	40	59	134	122	137	185
	1237409	1237200		-	-	NGK_1496	Hypothetical	hypothetical protein	0	0	0	0	0	0	31
1237984	1237984	1237427		-	-	NGK_1497	Hypothetical	hypothetical protein	47	0	0	177	116	63	88
	1239693	1238059		-	-	NGK_1498	Hypothetical	hypothetical protein	12	10	0	46	64	40	44
	1240097	1239756		-	-	NGK_1499	Hypothetical	hypothetical protein	0	69	0	35	99	25	136
1241353	1241353	1240094		-	-	NGK_1500	Metabolism	phosphoserine aminotransferase	51	130	32	141	59	36	60
	1241380	1241997		+	-	NGK_1501	Hypothetical	hypothetical protein	6	46	0	53	70	62	17
	1242016	1243527		+	nusA	NGK_1502	Transcription	transcription elongation factor NusA	181	53	48	64	249	234	124
	1243539	1246370		+	infB	NGK_1503	Translation	translation initiation factor IF-2	93	40	51	48	148	126	133
	1247870	1246530		-	-	NGK_1504	Membrane	membrane protein	7	0	0	10	40	9	0
	1249311	1247944		-	-	NGK_1505	Hypothetical	hypothetical protein	4	0	0	30	17	12	18
	1249427	1250053	1250053	+	-	NGK_1506	Iron	Hemolysin, putative	197	45	28	101	175	124	100
	1251536	1250118		-	-	NGK_1507	Transport	Alanine or glycine:cation symporter, AGCS family	3	0	16	10	20	5	3
1251863	1251863	1252591		+	-	NGK_1508	Hypothetical	hypothetical protein	156	45	101	217	227	45	188
	1253138	1252650		-	-	NGK_1509	Hypothetical	hypothetical protein	18	0	0	78	59	53	39
	1253314	1253135		-	-	NGK_1510	Hypothetical	hypothetical protein	0	0	0	15	35	11	0
	1253297	1253422		+	-	NGK_1511	Hypothetical	hypothetical protein	0	0	0	0	2	0	0
	1253853	1253590		-	-	NGK_1512	Hypothetical	hypothetical protein	0	0	104	0	0	0	0
1254684	1254684	1254160	1254160	-	-	NGK_1513	Regulator	putative AsnC-family transcriptional regulator	24	0	0	105	19	24	12
1254846	1254846	1255904	1255904	+	-	NGK_1514	Hypothetical	hypothetical protein	517	165	184	312	334	426	559
	1255951	1256064		+	-	NGK_1515	Hypothetical	hypothetical protein	0	0	0	0	10	152	0
	1256434	1256192		-	-	NGK_1516	Hypothetical	hypothetical protein	0	0	0	0	0	0	0
	1257804	1256446	1256446	-	-	NGK_1517	Hypothetical	hypothetical protein	68	31	0	115	128	41	84
	1258088	1257816		-	-	NGK_1518	Hypothetical	hypothetical protein	67	213	0	228	219	92	70
	1259091	1258213		-	-	NGK_1519	Membrane	Periplasmic protein	26	0	0	105	28	27	41
1259999	1259999	1259088		-	-	NGK_1520	Metabolism	N5-glutamine S-adenosyl-L-methionine-dependent methyltransferase	81	78	30	352	235	164	181
	1260131	1260538		+	-	NGK_1521	Phage Associated	putative phage associated protein	10	0	0	0	0	2	0
	1260601	1260804		+	-	NGK_1522	Hypothetical	hypothetical protein	0	0	0	0	0	0	0
	1260944	1261597		+	-	NGK_1523	Transposase	IS1016 transposase	8	31	29	0	9	14	0
	1261642	1261755		+	-	NGK_1524	Hypothetical	hypothetical protein	0	0	0	0	8	4	0
	1261871	1262212		+	-	NGK_1525	Phage Associated	putative phage associated protein	0	29	0	11	11	6	0
	1262435	1262965		+	-	NGK_1526	Hypothetical	hypothetical protein	0	0	0	0	3	4	0
	1263164	1263036		-	-	NGK_1527	Transport	comE operon protein 1-like protein	0	0	0	57	119	6	48
1268974	1268974	1270158		+	-	NGK_1528	Metabolism	putative flavoprotein	82	63	23	159	121	169	171
	1272381	1270225		-	-	NGK_1529	Metabolism	guanosine-3',5'-bis(diphosphate) 3'-pyrophosphohydrolase	52	88	59	44	102	91	54
1272680	1272680	1272474	1272474	-	-	NGK_1530	Transcription	DNA-directed RNA polymerase subunit omega	407	319	0	827	333	485	288
	1273379	1272738		-	gmk	NGK_1531	Metabolism	guanylate kinase	70	24	30	165	221	146	48
	1273483	1274082		+	-	NGK_1532	Metabolism	adenine phosphoribosyltransferase	61	0	141	59	75	4	58
	1274919	1274128		-	-	NGK_1533	Hypothetical	hypothetical protein	29	0	26	6	20	14	28
	1275001	1275159		+	-	NGK_1534	Hypothetical	hypothetical protein	14	0	0	7	63	35	0
	1275242	1276597		+	-	NGK_1535	Metabolism	putative protease	38	48	39	42	70	83	36
	1276728	1277201		+	-	NGK_1536	Hypothetical	hypothetical protein	40	0	0	17	27	19	50
	1277760	1277410		-	hbpA	NGK_1537	Iron	hemoglobin receptor	14	0	0	28	18	26	0
	1278707	1277745		-	hbpB	NGK_1538	Iron	hemoglobin receptor	18	25	22	21	11	14	0
	1279768	1278929		-	hbpC	NGK_1539	Iron	hemoglobin receptor	77	0	30	38	25	20	12
	1279996	1280649		+	-	NGK_1540	Transposase	IS1016 transposase	6	0	0	16	7	6	12
1281387	1281387	1280674		-	hbpD	NGK_1541	Iron	Haem utilisation protein	70	41	115	393	140	130	58
	1281457	1281585		+	-	NGK_1542	Hypothetical	hypothetical protein	0	0	0	7	0	17	0
	1281614	1282948		+	-	NGK_1543	Other	protein PqiA	34	30	0	14	54	24	34
	1282941	1284602		+	-	NGK_1544	Other	protein PqiB	31	0	16	19	43	35	51
	1284602	1285120		+	-	NGK_1545	Lipoprotein	Lipoprotein	28	0	0	2	83	95	84
	1285124	1285675		+	-	NGK_1546	Metabolism	putative DNA-3-methyladenineglycosylase I	97	0	0	7	93	80	57
	1285665	1286306		+	-	NGK_1547	Metabolism	GDSL lipase family protein	108	54	0	7	42	34	12
	1286529	1286299		-	-	NGK_1548	Hypothetical	hypothetical protein	17	0	0	0	0	0	0
	1286528	1286836		+	-	NGK_1549	Membrane	membrane protein	70	0	0	39	234	94	134
	1286867	1289719		+	-	NGK_1550	Metabolism	glycine dehydrogenase	24	33	9	36	69	56	34
	1290420	1289827		-	-	NGK_1551	Hypothetical	hypothetical protein	1	0	0	17	19	5	0
1290649	1290649	1290530	1290530	-	-	NGK_1552	Hypothetical	hypothetical protein	0	239	0	75	164	38	172
	1291920	1291081		-	-	NGK_1553	Energy Metabolism	cytochrome c5	136	112	126	974	364	207	272
	1293538	1292345		-	-	NGK_1554	Metabolism	aromatic amino acid aminotransferase	18	0	0	15	43	44	18
	1294646	1293558		-	-	NGK_1555	Translation	tRNA (uracil-5-)-methyltransferase	88	52	25	23	76	58	34
	1294793	1295893		+	-	NGK_1556	Metabolism	chorismate synthase	111	0	0	15	29	36	18
	1295984	1296409	1296409	+	-	NGK_1557	Hypothetical	hypothetical protein	269	43	134	271	415	382	385
	1298468	1296483		-	-	NGK_1558	DNA Metabolism	DNA topoisomerase IV subunit B	23	0	10	17	25	24	4
1299143	1299143	1298535	1298535	-	-	NGK_1559	Metabolism	dinucleoside polyphosphate hydrolase	127	42	0	180	332	78	257
	1299225	1300520		+	-	NGK_1560	Translation	seryl-tRNA synthetase	80	76	42	181	154	104	78
1301630	1301630	1300593	1300593	-	-	NGK_1561	Metabolism	D-lactate dehydrogenase	251	71	186	422	391	359	270
	1302792	1301716		-	prfA	NGK_1562	Membrane	peptide chain release factor 1	54	0	0	27	36	34	27
	1303652	1302882		-	-	NGK_1563	Hypothetical	hypothetical protein	0	31	0	15	9	5	0
	1304647	1303655		-	-	NGK_1564	Amino Acid Metabolism	protein AnsA	79	0	10	71	60	10	51
	1305397	1304714		-	-	NGK_1565	Membrane	DedA-family integral membrane protein	26	0	20	96	78	35	56
	1305411	1305542		+	-	NGK_1566	Hypothetical	hypothetical protein	0	0	0	0	0	0	0
	1306923	1305586		-	glmM	NGK_1567	Metabolism	phosphoglucosamine mutase	89	42	15	59	58	42	40
	1307039	1306920		-	-	NGK_1568	Hypothetical	hypothetical protein	0	0	0	26	21	21	0
	1307904	1307050		-	-	NGK_1569	Hypothetical	hypothetical protein	48	30	0	50	22	22	40
	1308952	1308044		-	-	NGK_1570	Metabolism	Chorismate mutase-related protein	14	0	29	29	37	45	56
	1309593	1308934		-	-	NGK_1571	Hypothetical	hypothetical protein	181	0	0	20	111	99	6
	1309621	1311129		+	-	NGK_1572	Hypothetical	hypothetical protein	9	0	60	6	22	11	20
	1312671	1311193		-	-	NGK_1573	Metabolism	3-octaprenyl-4-hydroxybenzoate carboxy-lyase	50	14	0	85	92	78	45
	1313206	1312691		-	-	NGK_1574	Hypothetical	hypothetical protein	30	111	39	102	98	57	39
	1313530	1313213		-	-	NGK_1575	Membrane	membrane protein	37	0	8	157	138	67	99
	1313750	1313598		-	-	NGK_1576	Hypothetical	hypothetical protein	0	0	0	44	35	8	46
	1314463	1313843		-	-	NGK_1577	Hypothetical	hypothetical protein	21	34	0	24	24	24	21
	1314438	1314692		+	-	NGK_1578	Hypothetical	hypothetical protein	34	0	0	0	0	0	0
	1314874	1314689		-	-	NGK_1579	Hypothetical	hypothetical protein	0	0	0	0	0	10	0
	1314855	1314986		+	-	NGK_1580	Hypothetical	hypothetical protein	0	0	0	0	0	31	30
	1315149	1315283		+	-	NGK_1581	Hypothetical	hypothetical protein	0	0	0	0	6	78	6
	1315385	1316050		+	fabG	NGK_1582	Metabolism	3-ketoacyl-ACP reductase	0	0	0	7	2	28	98
	1316044	1317300		+	-	NGK_1583	Metabolism	Putative 3-oxoacyl-(Acyl-carrier-protein) synthase	0	17	0	9	4	16	65
	1317593	1318351		+	-	NGK_1584	Metabolism	protein LgtF	24	0	0	19	48	43	18
	1318352	1319416		+	-	NGK_1585	Metabolism	RfaK	22	0	0	32	23	22	2
	1319406	1319522		+	-	NGK_1586	Hypothetical	hypothetical protein	0	0	0	7	0	0	0
	1319650	1320987		+	-	NGK_1587	Transport	putative sodium dependent ion transport protein	4	37	15	22	53	6	18
	1321761	1321162		-	-	NGK_1588	Other	NosX protein	8	0	0	14	27	9	39
	1322174	1321794		-	-	NGK_1589	Hypothetical	Hypothetical periplasmic protein	0	75	0	22	34	11	24
	1322983	1322183		-	thyA	NGK_1590	Metabolism	thymidylate synthase	63	34	24	55	86	39	87
1323361	1323401	1324735	1324735	+	-	NGK_1591	Metabolism	glutamate dehydrogenase	514	395	317	955	397	166	74
	1324977	1324732		-	-	NGK_1592	Hypothetical	hypothetical protein	0	0	0	9	4	33	36
	1325846	1324974		-	-	NGK_1593	Regulator	GntR family transcriptional regulator	21	0	0	29	15	16	4
	1326103	1326330		+	-	NGK_1594	Transport	L-lactate permease-like protein	0	0	0	98	7	6	0
	1326358	1326507		+	-	NGK_1595	Hypothetical	hypothetical protein	0	0	0	166	121	0	0
	1328111	1326708	1326708	-	-	NGK_1596	Host Interactions	protein MtrE	289	58	58	35	462	63	461
1331367	1331367	1328164		-	-	NGK_1597	Host Interactions	antibiotic resistance efflux pump component	197	56	23	36	375	128	296
1332617	1332617	1331379	1331379	-	-	NGK_1598	Host Interactions	antibiotic resistance efflux pump component	265	88	22	35	432	247	286
1332787	1332787	1332674	1332674	-	-	NGK_1599	Hypothetical	hypothetical protein	153	0	482	113	824	705	596
	1332867	1333499		+	-	NGK_1600	Regulator	MtrR protein	30	0	0	2	3	0	0
	1333849	1333592		-	-	NGK_1601	Hypothetical	hypothetical protein	93	0	0	9	28	3	0
	1334103	1335704		+	-	NGK_1602	Host Interactions	antibiotic resistance efflux pump component	25	11	47	36	102	53	103
	1338983	1335774		-	-	NGK_1603	DNA Metabolism	putative exodeoxyribonuclease V	7	7	8	15	12	15	1
	1338966	1339091		+	-	NGK_1604	Hypothetical	hypothetical protein	0	0	0	0	0	29	0
	1340493	1339084	1339084	-	-	NGK_1605	Membrane	membrane protein	51	0	0	174	5	0	0
	1340820	1340602		-	-	NGK_1606	Hypothetical	hypothetical protein	0	0	0	9	17	16	0
	1342156	1340837	1340837	-	-	NGK_1607	Energy Metabolism	protein CcoP	118	101	8	367	210	179	262
	1342350	1342180	1342180	-	-	NGK_1608	Energy Metabolism	Cb-type cytochrome c oxidase subunit IV	68	44	580	318	381	364	819
	1342966	1342355	1342355	-	-	NGK_1609	Energy Metabolism	cbb3-type cytochrome c oxidase subunit II	291	143	358	777	395	265	420
	1344426	1342993		-	-	NGK_1610	Energy Metabolism	cbb3-type cytochrome c oxidase subunit I	175	161	240	708	550	300	692
	1344716	1344600		-	-	NGK_1611	Hypothetical	hypothetical protein	0	0	0	15	9	0	0
	1344860	1346500		+	-	NGK_1612	Hypothetical	hypothetical protein	6	17	0	25	41	47	43
	1346526	1346993	1346993	+	-	NGK_1613	Hypothetical	hypothetical protein	134	58	0	134	83	37	6
	1347928	1347494	1347494	-	-	NGK_1614	Transport	ExbD protein	198	336	50	365	135	83	89
	1348593	1347931	1347931	-	-	NGK_1615	Energy Metabolism	ExbB oriteub	37	130	101	247	93	77	143
	1349510	1348659		-	-	NGK_1616	Iron	TonB	96	215	310	216	84	76	44
	1349706	1350404		+	-	NGK_1617	Hypothetical	hypothetical protein	161	38	0	94	124	22	112
	1351117	1350476	1350476	-	-	NGK_1618	Energy Metabolism	glutaredoxin	128	87	41	180	138	59	131
	1351260	1353473		+	-	NGK_1619	Metabolism	putative GTP pyrophosphokinase	35	31	0	27	31	24	14
	1353914	1353537		-	-	NGK_1620	Hypothetical	hypothetical protein	19	0	0	77	142	216	7
	1354438	1353983		-	-	NGK_1621	Hypothetical	hypothetical protein	0	0	0	35	59	49	0
	1355048	1354419		-	-	NGK_1622	Hypothetical	hypothetical protein	0	45	43	18	38	48	0
	1355319	1355197		-	-	NGK_1623	Hypothetical	hypothetical protein	0	0	0	0	0	31	0
	1356581	1355850		-	-	NGK_1624	Hypothetical	hypothetical protein	16	0	0	7	29	82	0
	1356591	1356707		+	-	NGK_1625	Hypothetical	hypothetical protein	0	0	0	0	0	0	0
	1357167	1356748		-	-	NGK_1626	Hypothetical	hypothetical protein	0	0	0	2	14	16	0
	1357901	1357164		-	-	NGK_1627	Hypothetical	hypothetical protein	40	0	0	10	61	16	18
	1358319	1358032		-	-	NGK_1628	Hypothetical	hypothetical protein	0	0	0	36	172	0	236
1359281	1359281	1358844	1358844	-	-	NGK_1629	Hypothetical	hypothetical protein	0	0	61	3	190	0	228
	1359754	1359419	1359419	-	-	NGK_1630	Hypothetical	hypothetical protein	0	181	109	271	0	457	497
	1360482	1359751		-	-	NGK_1631	Hypothetical	hypothetical protein	0	83	37	27	8	83	121
	1360835	1360617		-	-	NGK_1632	Hypothetical	hypothetical protein	44	0	0	19	73	208	93
1361514	1361514	1361287	1361287	-	-	NGK_1633	Hypothetical	hypothetical protein	0	0	0	75	262	244	470
	1361704	1361573		-	-	NGK_1634	Hypothetical	hypothetical protein	17	0	0	9	34	72	42
	1362239	1361886		-	-	NGK_1635	Hypothetical	hypothetical protein	34	0	0	23	16	13	87
	1363084	1362536		-	-	NGK_1636	Hypothetical	hypothetical protein	244	0	35	0	1126	1340	1183
	1364891	1363074		-	-	NGK_1637	Replication	protein MafB3	46	0	28	17	139	106	139
	1365836	1364895		-	-	NGK_1638	Replication	protein MafA3	59	0	29	29	16	11	0
	1365855	1365968		+	-	NGK_1639	Hypothetical	hypothetical protein	0	0	0	0	2	0	0
	1366629	1365976		-	-	NGK_1640	Transposase	IS1016 transposase	25	0	34	7	7	3	15
	1366696	1367277		+	-	NGK_1641	Hypothetical	hypothetical protein	7	0	0	10	14	14	6
	1367408	1367271		-	-	NGK_1642	Hypothetical	hypothetical protein	0	0	0	0	0	0	0
	1367407	1369068		+	-	NGK_1643	Energy Metabolism	Electron transfer flavoprotein-ubiquinone oxidoreductase	14	0	13	26	49	45	6
	1369221	1369093		-	-	NGK_1644	Hypothetical	hypothetical protein	41	0	0	0	0	22	0
	1369696	1369202		-	-	NGK_1645	Energy Metabolism	protein NosL	56	178	93	300	194	120	135
	1370523	1369693		-	-	NGK_1646	Other	NosY	0	35	10	18	11	7	5
	1371446	1370520		-	-	NGK_1647	Transport	ABC transporter ATP-binding protein	0	29	0	14	20	9	18
	1372052	1371474		-	-	NGK_1648	Transport	Copper ABC transporter, periplasmic copper-binding protein	33	0	0	16	7	13	0
	1372793	1372059		-	-	NGK_1649	Transport	Copper ABC transporter, periplasmic copper-binding protein	0	0	0	1	2	1	7
	1372824	1372940		+	-	NGK_1650	Hypothetical	hypothetical protein	0	0	0	7	0	0	0
	1373358	1373002		-	-	NGK_1651	Energy Metabolism	nitrous-oxide reductase precurser	0	0	0	18	19	12	0
	1375071	1373368		-	-	NGK_1652	Energy Metabolism	nitrous-oxide reductase	0	27	43	14	18	33	36
	1376285	1375098		-	-	NGK_1653	Regulator	Regulatory protein NosR	3	0	6	5	17	16	3
	1377404	1376289		-	-	NGK_1654	Energy Metabolism	FMN-binding protein	0	0	89	12	15	19	20
	1378898	1377651		-	hemA	NGK_1655	Translation	glutamyl-tRNA reductase	14	0	56	101	80	32	46
	1379485	1379051	1379051	-	-	NGK_1656	Metabolism	glycine cleavage system protein H	314	175	111	645	432	195	239
	1379986	1379489	1379489	-	-	NGK_1657	Hypothetical	hypothetical protein	10	0	0	152	64	30	74
	1379999	1380178		+	-	NGK_1658	Hypothetical	hypothetical protein	0	0	0	0	0	0	0
	1381275	1380175	1380175	-	gcvT	NGK_1659	Metabolism	glycine cleavage system aminomethyltransferase T	97	44	69	228	146	46	144
	1381246	1381464		+	-	NGK_1660	Hypothetical	hypothetical protein	0	0	0	0	0	0	0
	1381554	1381697		+	-	NGK_1661	Hypothetical	hypothetical protein	0	0	0	0	0	0	0
	1381727	1382269	1382269	+	-	NGK_1662	Regulator	transcriptional regulator, AsnC family	277	52	50	145	122	59	170
	1382325	1382921		+	-	NGK_1663	Hypothetical	hypothetical protein	34	48	177	138	130	112	91
	1382918	1383277		+	-	NGK_1664	Membrane	Membrane protein	3	0	0	25	49	26	0
	1383331	1383621		+	-	NGK_1665	Membrane	C4-dicarboxylate-binding periplasmic protein	21	93	0	55	26	6	0
1383663	1383663	1385057	1385057	+	-	NGK_1666	Membrane	Membrane protein	145	57	0	114	220	102	208
	1385784	1385131		-	-	NGK_1667	Transposase	IS1016 transposase	0	0	0	1	7	4	3
	1386022	1387365	1387365	+	-	NGK_1668	Energy Metabolism	Na(+)-translocating NADH-quinone reductase subunit A	42	55	14	148	142	64	180
	1387368	1388600		+	-	NGK_1669	Energy Metabolism	Na(+)-translocating NADH-quinone reductase subunit B	35	4	18	64	142	86	210
	1388593	1389369		+	-	NGK_1670	Energy Metabolism	Na(+)-translocating NADH-quinone reductase subunit C	46	0	45	34	121	58	145
	1389378	1389995		+	-	NGK_1671	Energy Metabolism	Na(+)-translocating NADH-quinone reductase subunit D	69	180	30	60	76	50	81
	1389999	1390592		+	-	NGK_1672	Energy Metabolism	Na(+)-translocating NADH-quinone reductase subunit E	50	20	0	35	109	56	108
1390606	1390606	1391823	1391823	+	-	NGK_1673	Energy Metabolism	Na(+)-translocating NADH-quinone reductase subunit F	96	122	11	56	226	139	378
	1392279	1392142		-	-	NGK_1674	Hypothetical	hypothetical protein	0	0	0	0	0	0	0
	1392319	1393395		+	-	NGK_1675	Membrane	ApbE protein	0	0	0	6	21	32	9
	1393421	1393636		+	-	NGK_1676	Membrane	Periplasmic protein	31	0	0	5	9	7	41
	1394338	1393760	1393760	-	-	NGK_1677	Stress	heat shock protein GrpE	203	168	46	180	782	408	122
	1394359	1394475		+	-	NGK_1678	Hypothetical	hypothetical protein	0	0	0	0	13	0	0
	1394521	1395339		+	-	NGK_1679	Metabolism	protein CysE	48	0	0	11	29	26	19
	1395539	1395378		-	-	NGK_1680	Hypothetical	hypothetical protein	0	0	139	46	7	31	63
	1397054	1395543		-	ubiB	NGK_1681	Metabolism	putative ubiquinone biosynthesis protein UbiB	25	0	31	50	81	45	74
	1397298	1397089		-	-	NGK_1682	Hypothetical	hypothetical protein	80	0	0	57	65	18	0
	1397689	1397543		-	-	NGK_1683	Hypothetical	hypothetical protein	0	0	0	63	21	4	36
1398167	1398167	1397706	1397706	-	-	NGK_1684	Metabolism	Putative iron-sulfur cluster insertion protein erpA	162	124	59	485	240	147	76
	1398863	1398177	1398177	-	-	NGK_1685	Regulator	putative transcriptional regulator, repressor	117	0	78	266	143	359	254
	1399012	1398896		-	-	NGK_1686	Hypothetical	hypothetical protein	0	0	0	25	6	34	0
	1399050	1399322		+	-	NGK_1687	Hypothetical	hypothetical protein	114	0	0	26	157	149	229
	1399582	1399460		-	-	NGK_1688	Hypothetical	hypothetical protein	0	0	0	0	0	6	0
1399514	1399575	1401458	1401458	+	dnaK	NGK_1689	Stress	molecular chaperone DnaK	536	377	142	299	1969	1248	437
	1401711	1402934		+	-	NGK_1690	Hypothetical	hypothetical protein	0	0	0	0	1	0	0
	1402906	1403607		+	-	NGK_1691	Hypothetical	hypothetical protein	0	0	0	0	12	0	0
	1403664	1404641		+	-	NGK_1692	Hypothetical	hypothetical protein	4	0	0	4	4	0	0
	1404784	1404638		-	-	NGK_1693	Hypothetical	hypothetical protein	0	0	0	0	2	14	29
	1405194	1405883		+	-	NGK_1694	Transport	ABC transporter permease	16	0	0	4	3	3	0
	1405987	1406682	1406682	+	-	NGK_1695	Transport	ABC transporter ATP-binding protein	124	93	112	341	207	86	122
1406874	1406874	1407488		+	-	NGK_1696	Transport	protein CadB	119	46	84	250	164	209	253
	1408233	1408880		+	-	NGK_1697	Membrane	putative integral membrane protein	35	0	0	20	40	48	62
	1411089	1408927		-	-	NGK_1698	Replication	primosome assembly protein PriA	2	12	0	15	15	13	14
1411256	1411256	1412041	1412041	+	-	NGK_1699	Metabolism	Thiol:disulfide interchange protein	111	106	58	155	110	118	82
	1414074	1412140		-	-	NGK_1700	Transport	ABC transporter ATP-binding protein	30	14	0	24	28	22	31
	1415318	1414140	1414140	-	-	NGK_1701	Lipoprotein	MacA protein	113	37	0	78	166	72	84
	1415544	1415933		+	-	NGK_1702	Pilin	PilV	65	0	0	0	42	13	20
	1419512	1416027		-	-	NGK_1703	Hypothetical	hypothetical protein	33	13	0	7	41	23	25
	1419514	1419675		+	-	NGK_1704	Hypothetical	hypothetical protein	0	0	0	1	1	9	0
	1419996	1420577		+	-	NGK_1705	Hypothetical	hypothetical protein	158	96	94	134	156	102	99
	1420558	1421034		+	-	NGK_1706	Hypothetical	hypothetical protein	41	0	0	14	19	15	9
	1421157	1421279		+	-	NGK_1707	Hypothetical	hypothetical protein	0	61	52	0	13	25	0
	1421276	1421965		+	-	NGK_1708	Metabolism	UDP-2,3-diacylglucosamine hydrolase	7	31	32	13	15	13	0
	1422234	1423820	1423820	+	-	NGK_1709	Transport	LctP	71	156	173	145	221	132	245
	1424189	1423986	1423986	-	-	NGK_1710	Hypothetical	hypothetical protein	182	0	86	410	247	130	345
	1424205	1424327		+	-	NGK_1711	Hypothetical	hypothetical protein	0	0	0	21	0	0	0
	1424305	1424802		+	-	NGK_1712	Hypothetical	hypothetical protein	0	0	0	5	1	0	10
	1424803	1426074		+	-	NGK_1713	Metabolism	aromatic amino acid aminotransferase	40	46	0	69	57	43	32
	1426644	1426075		-	-	NGK_1714	Hypothetical	hypothetical protein	0	50	0	2	14	18	0
	1426643	1426759		+	-	NGK_1715	Hypothetical	hypothetical protein	0	0	0	0	14	0	59
	1426888	1426769		-	-	NGK_1716	Hypothetical	hypothetical protein	162	0	0	48	116	64	73
	1428632	1427121		-	lysS	NGK_1717	Translation	lysyl-tRNA synthetase	76	91	46	62	145	71	70
	1430040	1428787		-	-	NGK_1718	Membrane	membrane protein	60	8	7	17	112	21	8
	1430026	1430184		+	-	NGK_1719	Hypothetical	hypothetical protein	27	0	0	0	0	0	0
	1430394	1432295		+	-	NGK_1720	Metabolism	putative aminopeptidase	42	0	19	62	35	32	16
	1432312	1432467		+	-	NGK_1721	Hypothetical	hypothetical protein	0	0	0	0	3	14	0
	1432775	1432560		-	-	NGK_1722	Hypothetical	hypothetical protein	0	0	0	0	0	2	0
	1432977	1432822		-	-	NGK_1723	Hypothetical	hypothetical protein	97	0	0	0	0	0	32
	1433256	1433110		-	-	NGK_1724	Hypothetical	hypothetical protein	0	0	119	65	8	0	29
	1433542	1433390		-	-	NGK_1725	Hypothetical	hypothetical protein	64	0	0	14	23	0	0
	1434159	1433617		-	-	NGK_1726	Hypothetical	hypothetical protein	13	0	0	0	31	7	3
	1434455	1434159		-	-	NGK_1727	Membrane	outer membrane protein	52	0	68	26	41	205	97
	1434585	1434716		+	-	NGK_1728	Hypothetical	hypothetical protein	0	0	0	0	0	0	0
	1435481	1434690		-	-	NGK_1729	Membrane	outer membrane protein	182	48	103	156	61	145	192
	1436177	1435764		-	-	NGK_1730	Hypothetical	hypothetical protein	10	0	0	1	4	11	7
	1437775	1436195		-	purH	NGK_1731	Metabolism	bifunctional phosphoribosylaminoimidazolecarboxamide formyltransferase/IMP cyclohydrolase	17	0	0	2	9	23	0
	1439159	1437936		-	-	NGK_1732	Transport	Chloride channel protein-related protein	4	0	0	10	21	4	3
	1440056	1439223		-	-	NGK_1733	Metabolism	SerB protein	6	0	24	29	47	54	50
	1440102	1440230		+	-	NGK_1734	Hypothetical	hypothetical protein	0	0	0	3	0	3	10
	1440318	1441883		+	pntA	NGK_1735	Energy Metabolism	NAD(P) transhydrogenase subunit alpha	8	93	14	52	64	50	25
	1441887	1442270		+	-	NGK_1736	Membrane	Membrane protein	68	0	0	42	31	9	0
	1442350	1443735		+	pntB	NGK_1737	Metabolism	pyridine nucleotide transhydrogenase	25	75	20	30	49	41	9
1443877	1443877	1443764	1443764	-	-	NGK_1738	Hypothetical	hypothetical protein	147	251	0	0	117	48	503
1444521	1444521	1443943	1443943	-	-	NGK_1739	Other	protein MdaB	860	447	193	538	1323	2238	2685
	1444760	1445671		+	-	NGK_1740	Regulator	putative LysR-family transcriptional regulator	4	0	0	11	8	1	0
	1445793	1445939		+	-	NGK_1741	Hypothetical	hypothetical protein	0	0	0	0	0	0	0
	1446695	1446336		-	-	NGK_1742	Hypothetical	hypothetical protein	58	0	0	25	82	45	51
	1447210	1446716		-	-	NGK_1743	Hypothetical	hypothetical protein	55	0	111	73	88	51	109
	1447668	1447360	1447360	-	-	NGK_1744	Hypothetical	hypothetical protein	51	0	0	105	56	31	130
	1448167	1447907		-	-	NGK_1745	Hypothetical	hypothetical protein	43	0	0	20	85	80	59
	1448330	1448169		-	-	NGK_1746	Hypothetical	hypothetical protein	25	0	169	31	64	80	146
	1449005	1448376		-	-	NGK_1747	Hypothetical	hypothetical protein	84	55	0	60	110	55	26
	1449439	1449008		-	-	NGK_1748	Hypothetical	hypothetical protein	55	0	0	11	62	100	65
1449772	1449772	1449476	1449476	-	-	NGK_1749	Hypothetical	hypothetical protein	176	52	0	22	212	214	80
	1450342	1449893		-	-	NGK_1750	Hypothetical	hypothetical protein	186	31	222	129	363	302	306
	1451469	1450687		-	-	NGK_1751	Metabolism	biotin synthase	13	36	0	82	15	44	21
	1452104	1451457		-	-	NGK_1752	Metabolism	Dithiobiotin synthetase	28	0	0	42	26	48	22
	1453256	1452114		-	-	NGK_1753	Metabolism	8-amino-7-oxononanoate synthase	0	25	23	50	59	73	73
	1453460	1453278		-	-	NGK_1754	Metabolism	23S rRNA (uracil-5-)-methyltransferase RumA	95	0	0	84	74	50	144
	1453479	1454555		+	-	NGK_1755	Hypothetical	hypothetical protein	53	78	15	105	107	64	108
	1454700	1454572		-	-	NGK_1756	Hypothetical	hypothetical protein	0	0	162	0	8	5	0
	1456225	1454759		-	-	NGK_1757	Transport	C4-dicarboxylate transporter	19	34	0	48	65	50	55
	1457346	1456423		-	-	NGK_1758	Metabolism	agmatinase	27	0	0	40	109	77	143
	1459337	1457445		-	-	NGK_1759	Metabolism	arginine decarboxylase	65	35	58	105	92	90	96
	1459857	1459504		-	-	NGK_1760	Hypothetical	Hypothetical periplasmic protein	29	0	0	85	128	122	21
1461746	1461746	1459938	1459938	-	aspS	NGK_1761	Translation	aspartyl-tRNA synthetase	84	126	89	102	189	188	129
	1462505	1461804	1461804	-	-	NGK_1762	Membrane	membrane protein	109	0	31	131	101	111	82
	1462507	1462626		+	-	NGK_1763	Hypothetical	hypothetical protein	0	0	0	0	0	0	0
1463807	1463807	1462647	1462647	-	-	NGK_1764	Metabolism	putative phospholipase	119	41	14	139	135	134	152
	1464218	1463955	1463955	-	rpsT	NGK_1765	Translation	30S ribosomal protein S20	212	493	442	335	433	701	757
	1464427	1464275		-	-	NGK_1766	Hypothetical	hypothetical protein	0	0	0	0	0	0	0
1464442	1464442	1465665	1465665	+	-	NGK_1767	Transport	Spermidine/putrescine ABC transporter, periplasmic spermidine/putrescine-binding protein	244	57	67	203	228	264	208
	1466427	1466266		-	-	NGK_1768	Hypothetical	hypothetical protein	0	0	0	0	0	29	0
	1466930	1466751		-	-	NGK_1769	Hypothetical	hypothetical protein	0	0	0	25	0	0	0
	1467422	1467243		-	-	NGK_1770	Hypothetical	hypothetical protein	0	0	0	23	10	0	0
1470510	1470510	1467766		-	tbpA	NGK_1771	Iron	transferrin-binding protein A	70	69	95	221	36	17	19
	1472687	1470597		-	tbpB	NGK_1772	Iron	TbpB	41	34	0	201	22	29	12
	1472913	1472770		-	-	NGK_1773	Hypothetical	hypothetical protein	0	0	0	0	0	0	0
	1473169	1472948		-	-	NGK_1774	Hypothetical	hypothetical protein	0	0	0	0	0	0	0
	1473832	1473671		-	-	NGK_1775	Hypothetical	hypothetical protein	0	0	0	0	0	0	0
	1474197	1474036		-	-	NGK_1776	Hypothetical	hypothetical protein	0	0	0	0	0	0	0
	1474562	1474401		-	-	NGK_1777	Hypothetical	hypothetical protein	0	0	0	0	0	0	0
	1475125	1474964		-	-	NGK_1778	Hypothetical	hypothetical protein	0	0	0	0	0	0	0
	1476016	1476165		+	-	NGK_1779	Hypothetical	hypothetical protein	0	0	193	19	0	34	0
	1476323	1477432		+	-	NGK_1780	Hypothetical	hypothetical protein	38	0	49	28	12	17	9
	1477959	1477765		-	-	NGK_1781	Hypothetical	hypothetical protein	0	0	0	0	5	5	0
	1479141	1478161		-	-	NGK_1782	Metabolism	glutamate racemase	50	29	0	51	14	20	2
	1479162	1479623		+	-	NGK_1783	Hypothetical	hypothetical protein	33	62	59	17	29	11	90
	1479620	1480870		+	-	NGK_1784	Metabolism	putative amidase	14	0	0	16	31	19	40
	1480898	1481770		+	-	NGK_1785	Hypothetical	hypothetical protein	39	34	27	53	77	83	142
	1482958	1481816		-	-	NGK_1786	Hypothetical	hypothetical protein	22	19	47	5	14	32	15
	1483429	1483007		-	-	NGK_1787	Hypothetical	hypothetical protein	59	0	0	26	88	36	44
	1484231	1483422		-	-	NGK_1788	Metabolism	putative NTP pyrophosphohydrolase	55	35	0	28	78	36	46
	1484690	1484313		-	acpS	NGK_1789	Metabolism	4'-phosphopantetheinyl transferase	29	93	0	89	103	35	142
	1485507	1484740		-	-	NGK_1790	Metabolism	pyridoxine 5'-phosphate synthase	142	35	35	40	94	42	58
1486264	1486264	1485521	1485521	-	-	NGK_1791	DNA Metabolism	RecO	56	38	104	68	337	190	185
1487428	1487428	1486301	1486301	-	-	NGK_1792	Metabolism	putative chorismate mutase	126	20	0	94	194	118	154
	1488526	1487465		-	-	NGK_1793	Host Interactions	putative drug resistance protein	24	0	0	23	25	13	26
	1488820	1488542		-	-	NGK_1794	Membrane	putative integral membrane efflux protein	0	102	98	59	32	28	16
	1489685	1488810		-	-	NGK_1795	Hypothetical	hypothetical protein	48	9	0	84	71	12	56
1489840	1489840	1490277	1490277	+	-	NGK_1796	Pilin	pilin	192	0	0	0	164	49	231
	1490438	1490572		+	-	NGK_1797	Other	putative secreted protein	0	0	0	3	1	0	0
	1490673	1490789		+	-	NGK_1798	Hypothetical	hypothetical protein	0	0	0	8	4	10	0
	1490957	1491649		+	-	NGK_1799	Membrane	outer membrane preprotein PIIc	74	83	87	71	22	214	100
	1492775	1491930		-	-	NGK_1800	Energy Metabolism	nitrilase	4	0	0	20	27	11	5
	1492827	1493699		+	-	NGK_1801	Energy Metabolism	putative oxidoreductase	46	0	0	2	9	13	41
	1494959	1493757	1493757	-	-	NGK_1802	Hypothetical	hypothetical protein	75	62	60	144	110	56	186
	1495324	1494956		-	-	NGK_1803	Hypothetical	hypothetical protein	166	0	0	85	145	44	47
	1495498	1495941		+	-	NGK_1804	Regulator	Nitric oxide-sensitive repressor	119	64	61	110	141	50	40
	1495434	1495321		-	-	NGK_1805	Hypothetical	hypothetical protein	115	0	0	21	114	17	13
	1496807	1496103		-	-	NGK_1806	Hypothetical	hypothetical protein	52	0	0	87	53	21	23
	1498183	1496834		-	-	NGK_1807	Metabolism	acetate kinase	15	0	0	0	0	0	0
	1498956	1498345		-	-	NGK_1808	Hypothetical	hypothetical protein	0	0	0	0	3	0	0
	1499507	1498980		-	-	NGK_1809	Hypothetical	hypothetical protein	0	0	0	0	0	2	0
	1502003	1500057		-	-	NGK_1810	Metabolism	aconitate hydratase	2	0	0	0	6	2	0
	1502662	1501976		-	-	NGK_1811	Metabolism	aconitate hydratase 1	0	0	0	5	10	0	10
	1503527	1502739		-	-	NGK_1812	Hypothetical	hypothetical protein	0	0	0	3	7	0	4
	1504827	1503679		-	-	NGK_1813	Metabolism	methylcitrate synthase	0	0	0	11	4	2	8
	1505790	1504912		-	prpB	NGK_1814	Metabolism	2-methylisocitrate lyase	0	0	0	5	5	2	15
	1505895	1506023		+	-	NGK_1815	Hypothetical	hypothetical protein	0	0	0	0	3	6	19
	1507717	1506407		-	-	NGK_1816	Hypothetical	hypothetical protein	71	75	19	50	97	44	161
	1509031	1507853		-	-	NGK_1817	Replication	cell division protein FtsZ	287	326	140	626	664	603	567
	1510394	1509150		-	-	NGK_1818	Replication	protein FtsA	62	0	34	113	123	136	127
	1511208	1510480		-	-	NGK_1819	Replication	protein FtsQ	166	0	28	96	111	92	100
	1512112	1511198		-	ddl	NGK_1820	Amino Acid Metabolism	D-alanine--D-alanine ligase	24	0	30	59	81	121	41
	1513630	1512224		-	murC	NGK_1821	Metabolism	UDP-N-acetylmuramate--L-alanine ligase	51	0	26	75	108	53	56
	1514855	1513788		-	murG	NGK_1822	Metabolism	undecaprenyldiphospho-muramoylpentapeptide beta-N- acetylglucosaminyltransferase	70	17	21	50	82	24	25
	1516247	1514859		-	-	NGK_1823	Replication	FtsW	21	0	33	33	81	27	57
	1517646	1516309		-	murD	NGK_1824	Metabolism	UDP-N-acetylmuramoyl-L-alanyl-D-glutamate synthetase	16	76	0	24	50	32	53
	1518111	1517731		-	-	NGK_1825	Hypothetical	hypothetical protein	20	0	104	56	89	57	89
	1519318	1518236		-	mraY	NGK_1826	Metabolism	phospho-N-acetylmuramoyl-pentapeptide-transferase	19	0	47	19	40	8	30
	1519745	1519563		-	-	NGK_1827	Membrane	Periplasmic protein	0	0	152	108	37	48	12
	1521182	1521042		-	-	NGK_1828	Hypothetical	hypothetical protein	0	203	0	27	60	12	44
	1521052	1519742		-	-	NGK_1829	Metabolism	putative UDP-MurNAc-pentapeptide synthetase	39	22	0	35	47	41	65
	1522871	1521225		-	-	NGK_1830	Hypothetical	hypothetical protein	3	31	16	34	66	51	74
	1524372	1522894		-	murE	NGK_1831	Metabolism	UDP-N-acetylmuramoylalanyl-D-glutamate--2,6-diaminopimelate ligase	2	35	31	16	24	17	45
1526148	1526148	1524397	1524397	-	-	NGK_1832	Host Interactions	penicillin-binding protein 2	70	76	67	161	151	113	125
	1526472	1526209		-	-	NGK_1833	Replication	cell division protein FtsL	38	0	0	166	144	126	131
1527419	1527419	1526499	1526499	-	mraW	NGK_1834	Metabolism	S-adenosyl-methyltransferase MraW	132	47	154	136	208	112	163
	1527907	1527452		-	-	NGK_1835	Replication	cell division protein MraZ	198	193	190	404	256	276	173
	1528255	1529433		+	-	NGK_1836	Hypothetical	hypothetical protein	0	0	0	19	15	19	29
	1530695	1529874		-	-	NGK_1837	Metabolism	undecaprenyl pyrophosphate phosphatase	107	33	164	109	27	32	59
	1531372	1530728	1530728	-	-	NGK_1838	Metabolism	DsbA family thiol:disulfide interchange protein	34	112	0	113	93	87	69
1532244	1532244	1531375	1531375	-	-	NGK_1839	Hypothetical	hypothetical protein	88	62	31	208	121	71	57
	1533840	1532344		-	-	NGK_1840	Transport	Competence protein ComM	59	19	35	34	53	80	27
	1534335	1534204		-	-	NGK_1841	Hypothetical	hypothetical protein	0	12	0	1	4	3	0
	1534183	1533854	1533854	-	-	NGK_1842	Hypothetical	hypothetical protein	17	150	60	323	140	64	74
1534527	1534527	1534658		+	-	NGK_1843	Hypothetical	hypothetical protein	62	0	0	228	205	359	209
	1534671	1536188	1536188	+	-	NGK_1844	Transport	Sodium/proline symporter	34	30	0	108	166	66	36
	1536448	1536278		-	-	NGK_1845	Metabolism	Aminotransferase class-III	0	0	0	0	0	0	0
	1536440	1540045		+	-	NGK_1846	Metabolism	bifunctional proline dehydrogenase/pyrroline-5-carboxylate dehydrogenase	79	83	31	70	108	75	53
1540428	1540428	1541096	1541096	+	-	NGK_1847	Membrane	outer membrane protein	679	362	252	362	594	484	1505
	1541201	1541070		-	-	NGK_1848	Hypothetical	hypothetical protein	46	0	0	16	4	0	0
1541331	1541331	1541630	1541630	+	-	NGK_1849	Hypothetical	hypothetical protein	53	26	0	144	12	46	142
	1541905	1541690		-	-	NGK_1850	Hypothetical	hypothetical protein	0	0	0	0	0	3	0
	1542219	1542106		-	-	NGK_1851	Hypothetical	hypothetical protein	0	0	0	0	0	0	0
	1542244	1542375		+	-	NGK_1852	Hypothetical	hypothetical protein	0	0	0	0	12	0	0
	1542444	1543121		+	-	NGK_1853	Hypothetical	hypothetical protein	19	0	0	10	50	67	18
	1544165	1543395		-	-	NGK_1854	DNA Metabolism	putative exodeoxyribonuclease III	96	0	35	64	119	62	43
	1544470	1544225	1544225	-	-	NGK_1855	Regulator	putative ArsR family transcriptional regulator	283	348	0	106	450	445	402
	1544626	1544829		+	-	NGK_1856	Hypothetical	hypothetical protein	0	0	0	0	0	0	0
	1545102	1544959		-	-	NGK_1857	Hypothetical	hypothetical protein	0	0	0	2	19	26	14
	1546065	1545130		-	-	NGK_1858	Metabolism	putative nicotinate-nucleotide pyrophosphorylase	111	0	0	15	98	23	50
	1547025	1546087		-	-	NGK_1859	Hypothetical	hypothetical protein	108	0	55	86	93	13	31
1547170	1547170	1548339		+	-	NGK_1860	Metabolism	quinolinate synthetase	38	48	14	123	125	30	30
	1548391	1549899		+	-	NGK_1861	Metabolism	NadB protein	17	44	52	21	37	9	24
	1550588	1550139		-	-	NGK_1862	Transposase	IS1106 transposase	0	57	41	17	5	0	0
	1551277	1550720		-	-	NGK_1863	Metabolism	beta-phosphoglucomutase	0	0	0	1	0	0	0
	1552139	1551249		-	-	NGK_1864	Metabolism	putative maltose phosphorylase	0	0	0	2	3	4	0
	1552484	1552164		-	-	NGK_1865	Metabolism	maltose phosphorylase	0	0	0	13	2	1	0
	1553625	1552474		-	-	NGK_1866	Metabolism	putative maltose phosphorylase	9	0	0	10	10	9	21
	1554156	1553887		-	-	NGK_1867	Metabolism	aldose 1-epimerase	0	0	0	4	0	0	0
	1554457	1554170		-	-	NGK_1868	Metabolism	aldose 1-epimerase	0	0	0	20	0	0	12
	1555256	1554852		-	-	NGK_1869	Transport	putative sugar transporter	29	0	0	0	4	14	0
	1556288	1555269		-	-	NGK_1870	Transport	putative sugar transporter	37	21	0	48	19	42	5
	1556442	1558118	1558118	+	-	NGK_1871	Transport	putative ABC transporter ATP-binding protein	151	25	29	139	93	98	81
	1558663	1558178	1558178	-	-	NGK_1872	Metabolism	phosphatidylglycerophosphatase A	131	58	215	118	200	65	104
	1559612	1558656		-	-	NGK_1873	Metabolism	thiamine monophosphate kinase	4	29	23	84	50	80	25
	1559920	1559780		-	-	NGK_1874	Hypothetical	hypothetical protein	0	0	0	39	30	41	0
	1560153	1560356		+	-	NGK_1875	Hypothetical	hypothetical protein	0	0	0	0	11	7	0
1561097	1561097	1560387	1560336	-	-	NGK_1876	Membrane	Omp3	2001	1229	1279	3718	3458	4200	2557
	1561451	1561311		-	-	NGK_1877	Transport	MFS superfamily transporter	0	0	0	0	0	57	32
	1561461	1562411		+	-	NGK_1878	Regulator	transcriptional regulator CysB-like protein	25	28	0	97	113	87	46
	1563231	1562524		-	-	NGK_1879	Regulator	putative anaerobic transcriptional regulator	219	78	0	284	228	200	120
	1563393	1564814		+	-	NGK_1880	Metabolism	coproporphyrinogen III oxidase	185	28	46	40	95	133	119
	1565003	1564821		-	-	NGK_1881	Hypothetical	hypothetical protein	28	0	0	44	16	10	0
	1566613	1565054		-	-	NGK_1882	Transport	putative transport protein	48	28	17	80	64	46	62
1566846	1566846	1566610		-	-	NGK_1883	Membrane	membrane-associated ring finger (C3HC4) 7	119	121	0	204	196	149	122
	1566923	1568053		+	anmK	NGK_1884	Metabolism	anhydro-N-acetylmuramic acid kinase	11	0	0	35	17	8	3
	1568172	1569113		+	-	NGK_1885	Replication	protein MafA3	7	38	25	34	12	11	6
	1569117	1570847		+	-	NGK_1886	Replication	protein MafB4	31	0	15	38	45	114	126
	1570825	1571106		+	-	NGK_1887	Hypothetical	hypothetical protein	77	101	0	71	35	162	127
1571201	1571201	1571809		+	-	NGK_1888	Hypothetical	hypothetical protein	20	47	20	112	96	93	170
	1571806	1572222		+	-	NGK_1889	Hypothetical	hypothetical protein	3	0	0	71	66	44	94
	1572358	1573035		+	-	NGK_1890	Hypothetical	hypothetical protein	8	42	0	30	126	15	116
	1573560	1573847		+	-	NGK_1891	Hypothetical	hypothetical protein	0	0	0	37	201	7	149
	1573978	1574715		+	-	NGK_1892	Hypothetical	hypothetical protein	5	0	0	8	60	14	20
	1574712	1575131		+	-	NGK_1893	Hypothetical	hypothetical protein	0	0	0	10	39	8	0
	1575288	1575172		-	-	NGK_1894	Hypothetical	hypothetical protein	0	0	0	0	0	0	0
	1575460	1575651		+	-	NGK_1895	Hypothetical	hypothetical protein	24	0	0	87	15	32	0
	1575633	1575785		+	-	NGK_1896	Hypothetical	hypothetical protein	0	0	0	49	25	32	0
	1575772	1576317	1576317	+	-	NGK_1897	Hypothetical	hypothetical protein	0	0	0	112	34	58	0
	1576576	1576424		-	-	NGK_1898	Hypothetical	hypothetical protein	0	0	0	0	0	21	0
	1576769	1577122		+	-	NGK_1899	Hypothetical	hypothetical protein	35	0	0	86	87	88	0
	1577394	1577888		+	-	NGK_1900	Hypothetical	hypothetical protein	0	0	53	31	17	0	35
	1578008	1579141	1579141	+	-	NGK_1901	Hypothetical	hypothetical protein	44	0	22	182	44	106	47
	1579919	1579644		-	-	NGK_1902	Hypothetical	hypothetical protein	0	0	0	37	43	29	37
	1581268	1579916		-	-	NGK_1903	Amino Acid Metabolism	AmpG protein	45	33	40	85	111	95	57
	1582982	1581348		-	-	NGK_1904	Metabolism	protein GlnA	38	45	0	62	37	31	14
	1583047	1583886		+	-	NGK_1905	Metabolism	putative shikimate dehydrogenase	33	0	32	7	20	7	12
	1583889	1584590		+	mtgA	NGK_1906	Metabolism	monofunctional biosynthetic peptidoglycan transglycosylase	30	40	77	53	21	42	3
	1584602	1584844		+	-	NGK_1907	Hypothetical	hypothetical protein	0	0	0	6	8	0	0
	1585864	1585130		-	-	NGK_1908	Transport	ABC transporter ATP-binding protein	66	0	0	74	77	48	75
	1586465	1585935		-	-	NGK_1909	Hypothetical	hypothetical protein	33	0	58	97	30	56	120
1586991	1586991	1586446		-	-	NGK_1910	Hypothetical	hypothetical protein	158	0	45	171	166	310	161
1587587	1587587	1587024		-	-	NGK_1911	Metabolism	3-deoxy-D-manno-octulosonate 8-phosphate phosphatase	52	0	41	186	188	125	88
	1588606	1587626		-	-	NGK_1912	Metabolism	KpsF	13	21	0	55	39	21	9
	1588697	1589752		+	-	NGK_1913	Metabolism	transaldolase	140	54	44	91	44	32	66
	1589764	1589898		+	-	NGK_1914	Hypothetical	hypothetical protein	287	0	0	337	180	306	212
1590074	1590074	1590193		+	-	NGK_1915	Hypothetical	hypothetical protein	0	0	0	156	54	128	8
	1590210	1591097		+	-	NGK_1916	Metabolism	glutamyl-Q tRNA(Asp) synthetase	96	89	61	69	55	16	54
	1592213	1591167	1591167	-	-	NGK_1917	Translation	tRNA-dihydrouridine synthase A	99	83	50	127	167	99	118
	1592294	1593457		+	-	NGK_1918	DNA Metabolism	Putative integrase/recombinase phage associated protein	37	10	14	59	43	31	9
	1593773	1593507		-	-	NGK_1919	Phage Associated	putative phage associated protein	41	0	0	21	19	26	0
	1594828	1593881		-	-	NGK_1920	Phage Associated	putative phage associated protein	4	0	0	23	27	34	13
	1595006	1594800		-	-	NGK_1921	Hypothetical	hypothetical protein	0	0	0	5	38	0	0
	1596052	1595027		-	-	NGK_1922	Phage Associated	putative phage associated protein	23	0	0	32	18	28	9
	1596336	1596121		-	-	NGK_1923	Phage Associated	putative phage associated protein	0	0	0	19	23	12	0
	1596879	1596388		-	-	NGK_1924	Phage Associated	putative phage associated protein	0	58	0	10	11	21	8
	1597100	1596876		-	-	NGK_1925	Phage Associated	putative phage associated protein	0	0	0	3	15	35	11
	1597884	1597198		-	-	NGK_1926	Phage Associated	putative phage associated protein	0	0	0	11	4	10	0
	1598114	1597953		-	-	NGK_1927	Phage Associated	putative phage associated protein	0	0	0	18	24	0	0
	1598144	1598608		+	-	NGK_1928	Hypothetical	hypothetical protein	0	0	0	0	0	0	0
	1599775	1599299		-	-	NGK_1929	Phage Associated	putative phage associated protein	0	0	0	5	7	7	0
	1600008	1599808		-	-	NGK_1930	Phage Associated	putative phage associated protein	0	0	0	69	10	35	0
	1600492	1600710		+	-	NGK_1931	Phage Associated	putative phage associated protein	0	0	0	0	0	0	0
	1601086	1600727		-	-	NGK_1932	Phage Associated	putative phage associated protein	285	0	76	98	122	102	45
	1601626	1601087		-	-	NGK_1933	Phage Associated	putative phage associated protein	153	225	209	497	563	152	192
	1602490	1601786		-	-	NGK_1934	Phage Associated	Putative phage repressor protein phage associated protein	90	14	0	55	127	50	3
	1602913	1603068		+	-	NGK_1935	Phage Associated	putative phage associated protein	0	0	0	0	5	16	0
1603233	1603233	1603045	1603045	-	-	NGK_1936	Phage Associated	putative phage associated protein	226	0	0	277	215	213	354
	1603406	1603633		+	-	NGK_1937	Phage Associated	putative phage associated protein	85	0	3	5	22	12	0
	1603630	1604172		+	-	NGK_1938	Phage Associated	putative phage associated protein	0	0	35	1	15	27	7
	1604186	1604716		+	-	NGK_1939	Phage Associated	putative phage associated protein	0	0	0	0	22	9	0
	1604773	1605507		+	-	NGK_1940	Replication	Putative DNA replication protein, putative phage associated protein	0	0	0	2	6	12	0
	1605500	1605730		+	-	NGK_1941	Phage Associated	putative phage associated protein	0	0	0	4	3	0	0
	1605779	1606315		+	-	NGK_1942	Phage Associated	putative phage associated protein	0	0	0	8	1	7	0
	1606391	1606639		+	-	NGK_1943	Phage Associated	putative phage associated protein	0	0	0	14	6	4	0
	1606620	1606949		+	-	NGK_1944	Hypothetical	hypothetical protein	0	0	0	3	0	0	0
	1606946	1607320		+	-	NGK_1945	Phage Associated	putative phage associated protein	0	0	0	1	5	0	0
	1607465	1607337		-	-	NGK_1946	Hypothetical	hypothetical protein	0	0	0	0	0	0	0
	1608611	1607649		-	-	NGK_1947	Hypothetical	hypothetical protein	19	0	0	44	28	25	6
	1608712	1608825		+	-	NGK_1948	Hypothetical	hypothetical protein	0	0	0	0	34	37	0
	1609385	1609137		-	-	NGK_1949	Phage Associated	putative phage associated protein	0	0	0	12	19	0	2
	1610645	1609617		-	-	NGK_1950	Phage Associated	putative phage associated protein	15	0	0	20	11	13	19
	1610989	1610699		-	-	NGK_1951	Phage Associated	putative phage associated protein	0	0	0	0	4	5	0
	1612557	1610968		-	-	NGK_1952	Host Interactions	protein TspB2	3	0	0	36	24	42	33
	1613222	1612944		-	-	NGK_1953	Phage Associated	putative phage associated protein	0	0	98	0	8	1	0
	1613513	1613229		-	-	NGK_1954	Phage Associated	putative phage associated protein	0	0	0	8	0	1	0
	1613718	1613521		-	-	NGK_1955	Phage Associated	putative phage associated protein	0	0	0	0	8	16	0
	1614013	1613723		-	-	NGK_1956	Phage Associated	putative phage associated protein	0	0	0	0	3	11	0
	1615431	1614058		-	-	NGK_1957	Hypothetical	hypothetical protein	0	0	0	1	3	1	0
	1615968	1615546		-	-	NGK_1958	DNA Metabolism	Putative very short patch repair endonuclease	0	0	0	33	4	29	0
	1616570	1615974		-	-	NGK_1959	Hypothetical	hypothetical protein	0	0	0	73	17	96	0
	1617617	1616760		-	-	NGK_1960	Hypothetical	hypothetical protein	12	0	26	133	29	82	9
	1618002	1617631		-	-	NGK_1961	Metabolism	modification methylase	0	0	47	34	18	42	7
	1618511	1617999		-	-	NGK_1962	Metabolism	modification methylase	25	17	0	91	56	167	47
	1618976	1619122		+	-	NGK_1963	Hypothetical	hypothetical protein	0	0	0	0	0	0	0
	1618958	1618827		-	-	NGK_1964	Hypothetical	hypothetical protein	0	0	0	0	8	6	0
	1620064	1620453		+	-	NGK_1965	Hypothetical	hypothetical protein	0	0	0	0	1	6	0
	1620652	1620524		-	-	NGK_1966	Transport	comE operon protein 1-like protein	0	0	35	56	101	12	23
	1626930	1626397		-	-	NGK_1967	Metabolism	pseudouridine synthase	0	0	0	23	3	4	10
	1628348	1627695		-	-	NGK_1968	Transposase	IS1016 transposase	37	0	0	14	13	11	0
	1628796	1628440	1628440	-	-	NGK_1969	Regulator	putative nitrogen regulatory protein P-II	222	284	0	264	274	120	86
	1628929	1632885		+	-	NGK_1970	Metabolism	phosphoribosylformylglycinamidine synthase	23	18	0	8	17	16	14
	1634167	1632956		-	-	NGK_1971	Energy Metabolism	FMN oxidoreductase CC3083	2	0	0	0	9	6	0
	1634552	1634241		-	-	NGK_1972	Regulator	putative ArsR-family transcriptional regulator	0	0	0	11	61	15	32
	1634699	1634577		-	-	NGK_1973	Hypothetical	hypothetical protein	0	0	0	0	0	0	0
	1634784	1635536		+	-	NGK_1974	Metabolism	protein GloB	20	81	0	10	23	15	33
	1635770	1637224		+	-	NGK_1975	Transport	protein MgtE	37	34	18	15	62	45	15
	1638218	1637310		-	hslO	NGK_1976	Stress	Hsp33-like chaperonin	42	0	0	0	89	26	15
	1638463	1639131		+	-	NGK_1977	Membrane	Outer membrane protein precursor GNA2001	24	3	45	26	55	27	8
	1639150	1639368		+	-	NGK_1978	Hypothetical	hypothetical protein	25	0	0	87	80	68	0
	1639513	1639857		+	-	NGK_1979	Hypothetical	hypothetical protein	13	34	106	158	45	10	16
	1639857	1640549		+	-	NGK_1980	Hypothetical	hypothetical protein	5	0	38	42	11	0	12
	1640616	1641836		+	argJ	NGK_1981	Metabolism	bifunctional ornithine acetyltransferase/N-acetylglutamate synthase	59	22	0	33	27	0	9
	1641896	1643305		+	-	NGK_1982	Transport	Chloride channel protein-related protein	0	0	0	1	15	5	7
	1643379	1644884		+	-	NGK_1983	DNA Metabolism	ATP-dependent DNA helicase	6	0	18	2	27	21	7
	1645932	1645246		-	-	NGK_1984	Hypothetical	hypothetical protein	0	0	0	0	0	0	0
	1645999	1646112		+	-	NGK_1985	Hypothetical	hypothetical protein	0	0	0	0	0	0	0
	1646496	1646350		-	-	NGK_1986	Hypothetical	hypothetical protein	0	0	0	0	0	0	0
	1646619	1648193		+	-	NGK_1987	Hypothetical	hypothetical protein	12	0	0	15	25	31	26
	1648259	1651489		+	-	NGK_1988	Translation	HrpA protein	3	17	8	3	12	41	7
	1652571	1651609		-	-	NGK_1989	Hypothetical	hypothetical protein	0	25	0	32	9	38	34
	1652672	1652785		+	-	NGK_1990	Hypothetical	hypothetical protein	0	0	0	0	17	33	0
	1653331	1653083		-	-	NGK_1991	Phage Associated	putative phage associated protein	0	0	0	14	1	5	0
	1654591	1653563		-	-	NGK_1992	Phage Associated	putative phage associated protein	0	0	0	19	6	11	10
	1654935	1654645		-	-	NGK_1993	Phage Associated	putative phage associated protein	0	0	0	0	5	12	0
	1656503	1654914		-	-	NGK_1994	Host Interactions	protein TspB2	19	0	16	42	21	28	22
	1657168	1656890		-	-	NGK_1995	Phage Associated	putative phage associated protein	0	0	0	4	8	0	0
	1657393	1657175		-	-	NGK_1996	Phage Associated	putative phage associated protein	0	0	0	0	12	0	47
[truncated: 739 more rows]
