# Supplementary material for: The Gonococcal Transcriptome during Infection of the Lower Genital Tract in Women
Source: PLoS One. 2015 Aug 5;10(8):e0133982. doi: 10.1371/journal.pone.0133982 (PMC4526530; doi:10.1371/journal.pone.0133982)
Supplement: S4 Table — * Expression is defined as the RPKM level when aligning RNA isolated from Subjects 1–4 to the NCCP11945 strain of N. gonorrhoeae. RNA was aligned as biological replicates of a single experiment to generate a composite alignment combining all Subjects. ** Expression is defined as the RPKM level when aligning RNA isolated from the infecting strain of Subjects 1–3 after 3 hours of growth in CDM to the NCCP11945 strain of N. gonorrhoeae. RNA was aligned as biological replicates of a single experiment to generate a composite alignment combining all in vitro analyses. Subject 4 was negative for N. gonorrhoeae by plating and so an infecting strain was not isolated. (XLSX) [file pone.0133982.s004.xlsx]

## Sheet: Sheet1
Supplementary Table 4: Composite view of alignment of RNA from all Subjects and from infecting strains of Subjects 1-3 to the NCCP11945 strain of N. gonorrhoeae: Regulated Genes
* Expression is defined as the RPKM level when aligning RNA isolated from Subjects 1-4 to the NCCP11945 strain of N. gonorrhoeae. RNA was aligned as biological replicates of a single experiment to generate a composite alignment combining all Subjects.
** Expression is defined as the RPKM level when aligning RNA isolated from the infecting strain of Subjects 1-3 after 3 hours of growth in Chemically Defined Media (CDM) to the NCCP11945 strain of N. gonorrhoeae. RNA was aligned as biological replicates of a single experiment to generate a composite alignment combining all in vitro analyses. Subject 4 was negative for N. gonorrhoeae by plating an…
Transcription Start Site	Translation Start Site	Translation Stop Site	Transcription Stop Site	Strand	Name	Locus Tag	Category	Product	Expression* in Composite view in vivo	Expression** in Composite view in CDM	q-value in vivo vs. CDM	Fold Change: in vivo/CDM
	1041136	1042509		+	-	NGK_1273	Amino Acid Metabolism	Twin-argninine leader-binding protein DmsD	13	79	1.35197e-05	0.164557
	247945	246812		-	-	NGK_0307	DNA Metabolism	DNA cytosine methyltransferase M.NgoMIII	2	111	0	0.018018
	638156	638806		+	-	NGK_0787	DNA Metabolism	recombinase B	2	46	1.48896e-24	0.0434783
	471136	471327		+	-	NGK_0569	DNA Metabolism	Type i restriction enzyme EcoR124II specificity protein	11	164	1.98386e-18	0.0670732
	1152206	1149267		-	-	NGK_1383	DNA Metabolism	Type III restriction-modification system EcoPI enzyme, subunit res	2	27	3.35131e-13	0.0740741
	248590	247949		-	-	NGK_0308	DNA Metabolism	restriction endonuclease R.NgoMIII	7	74	6.38328e-09	0.0945946
	378230	378715		+	fxsA	NGK_0456	DNA Metabolism	FxsA protein	2	20	0.000222239	0.1
	1040315	1040815		+	-	NGK_1272	DNA Metabolism	restriction modification protein Mod	12	71	0.00325533	0.169014
	2072312	2071476		-	-	NGK_2480	DNA Metabolism	NgoPII restriction and modification	11	62	0.00191585	0.177419
	755959	755099		-	-	NGK_0931	DNA Metabolism	putative DNA restriction endonuclease	6	31	0.037668	0.193548
	490983	490084		-	rdgC	NGK_0591	DNA Metabolism	recombination associated protein	11	50	0.0276701	0.22
	1777151	1775127		-	-	NGK_2142	Energy Metabolism	NADH dehydrogenase subunit L	2	29	1.39871e-10	0.0689655
	1779781	1778699		-	-	NGK_2146	Energy Metabolism	NADH-quinone oxidoreductase subunit H	8	62	1.56826e-06	0.129032
	939342	940121		+	-	NGK_1143	Energy Metabolism	putative oxidoreductase	10	51	0.0174428	0.196078
	1387368	1388600		+	-	NGK_1669	Energy Metabolism	Na(+)-translocating NADH-quinone reductase subunit B	30	131	0.00632817	0.229008
	1784053	1782752		-	-	NGK_2148	Energy Metabolism	NuoF	21	87	0.0152644	0.241379
2205557	2205557	2205958	2205958	+	atpC	NGK_2627	Energy Metabolism	F0F1 ATP synthase subunit epsilon	133	473	0.0257225	0.281184
	657923	659014	659014	+	-	NGK_0807	Host Interactions	putative virulence associated protein	53	315	7.53108e-07	0.168254
	1989961	1989386		-	-	NGK_2388	Host Interactions	Bacteriocin resistance protein, putative	8	45	0.0119931	0.177778
	584593	583064		-	-	NGK_0712	Host Interactions	adhesin	20	94	0.00301952	0.212766
	1717956	1717792	1717792	-	-	NGK_2080	Host Interactions	putative virulence associated protein	59	269	0.0257225	0.219331
	561587	561420		-	-	NGK_0680	Hypothetical	hypothetical protein	1	64	0	0.015625
	155262	155459		+	-	NGK_0194	Hypothetical	hypothetical protein	1	55	0	0.0181818
217907	217907	218023		+	-	NGK_0272	Hypothetical	hypothetical protein	4	132	1.36008e-207	0.030303
	1945936	1946082		+	-	NGK_2345	Hypothetical	hypothetical protein	2	63	9.32271e-257	0.031746
	398847	398722		-	-	NGK_0484	Hypothetical	hypothetical protein	2	43	6.40894e-106	0.0465116
	2224992	2224762		-	-	NGK_2650	Hypothetical	hypothetical protein	6	120	2.12719e-34	0.05
	1363084	1362536		-	-	NGK_1636	Hypothetical	hypothetical protein	69	1246	1.78573e-82	0.0553772
	149510	149656		+	-	NGK_0187	Hypothetical	hypothetical protein	1	17	3.15974e-100	0.0588235
1361514	1361514	1361287	1361287	-	-	NGK_1633	Hypothetical	hypothetical protein	18	305	1.42288e-26	0.0590164
	117945	118088		+	-	NGK_0149	Hypothetical	hypothetical protein	3	50	8.24161e-44	0.06
	938754	939050		+	-	NGK_1142	Hypothetical	hypothetical protein	2	31	1.20892e-17	0.0645161
	1573560	1573847		+	-	NGK_1891	Hypothetical	hypothetical protein	8	100	2.82566e-14	0.08
	1324977	1324732		-	-	NGK_1592	Hypothetical	hypothetical protein	2	24	1.97958e-12	0.0833333
	252830	252958		+	-	NGK_0311	Hypothetical	hypothetical protein	3	36	1.52362e-18	0.0833333
	2116141	2116614		+	-	NGK_2522	Hypothetical	hypothetical protein	5	58	2.89409e-11	0.0862069
	1753008	1753151		+	-	NGK_2117	Hypothetical	hypothetical protein	3	33	1.47728e-15	0.0909091
	100088	99933		-	-	NGK_0130	Hypothetical	hypothetical protein	2	22	2.51997e-15	0.0909091
	1572358	1573035		+	-	NGK_1890	Hypothetical	hypothetical protein	8	87	2.87734e-10	0.091954
	1915379	1914864		-	-	NGK_2310	Hypothetical	hypothetical protein	5	54	1.42606e-08	0.0925926
	1109084	1110037		+	-	NGK_1344	Hypothetical	hypothetical protein	2	21	4.31412e-05	0.0952381
	1356581	1355850		-	-	NGK_1624	Hypothetical	hypothetical protein	5	52	6.88995e-07	0.0961538
	562849	562547		-	-	NGK_0684	Hypothetical	hypothetical protein	4	40	6.48628e-07	0.1
592731	592731	592922		+	-	NGK_0722	Hypothetical	hypothetical protein	33	323	3.5758e-10	0.102167
	1360835	1360617		-	-	NGK_1632	Hypothetical	hypothetical protein	15	146	5.78392e-07	0.10274
	70711	70550		-	-	NGK_0093	Hypothetical	hypothetical protein	7	68	1.23404e-08	0.102941
1101827	1101827	1101696	1101696	-	-	NGK_1336	Hypothetical	hypothetical protein	23	213	4.14557e-07	0.107981
	1361704	1361573		-	-	NGK_1634	Hypothetical	hypothetical protein	6	55	4.22738e-06	0.109091
	1357167	1356748		-	-	NGK_1626	Hypothetical	hypothetical protein	2	17	0.00127761	0.117647
	1357901	1357164		-	-	NGK_1627	Hypothetical	hypothetical protein	4	33	0.000180362	0.121212
	926998	926285		-	-	NGK_1131	Hypothetical	hypothetical protein	7	57	3.6253e-05	0.122807
	1353914	1353537		-	-	NGK_1620	Hypothetical	hypothetical protein	19	152	4.46573e-07	0.125
2198447	2198447	2198689	2198689	+	-	NGK_2618	Hypothetical	hypothetical protein	49	389	1.85487e-08	0.125964
	1542444	1543121		+	-	NGK_1853	Hypothetical	hypothetical protein	7	51	0.000612752	0.137255
	11164	11544		+	-	NGK_0015	Hypothetical	hypothetical protein	8	57	0.00054724	0.140351
	980083	979850		-	-	NGK_1200	Hypothetical	hypothetical protein	9	64	0.000971143	0.140625
	1885523	1885894		+	-	NGK_2272	Hypothetical	hypothetical protein	73	519	9.4815e-09	0.140655
	2138368	2138625	2138625	+	-	NGK_2545	Hypothetical	hypothetical protein	135	959	2.34476e-09	0.140772
	1358319	1358032		-	-	NGK_1628	Hypothetical	hypothetical protein	13	88	0.00287993	0.147727
	38016	37888		-	-	NGK_0051	Hypothetical	hypothetical protein	4	27	5.62007e-05	0.148148
	1275001	1275159		+	-	NGK_1534	Hypothetical	hypothetical protein	5	33	0.00483585	0.151515
	809527	809225		-	-	NGK_0998	Hypothetical	hypothetical protein	3	19	0.019359	0.157895
	1796121	1796237		+	-	NGK_2169	Hypothetical	hypothetical protein	4	25	0.000171287	0.16
	1770264	1769872		-	-	NGK_2135	Hypothetical	hypothetical protein	6	36	0.025348	0.166667
	2228499	2229212		+	-	NGK_2657	Hypothetical	hypothetical protein	11	65	0.00146091	0.169231
	1887646	1888005		+	-	NGK_2274	Hypothetical	hypothetical protein	10	59	0.0165997	0.169492
	1968444	1970717		+	-	NGK_2364	Hypothetical	hypothetical protein	5	29	0.00541874	0.172414
	1789197	1789445		+	-	NGK_2155	Hypothetical	hypothetical protein	7	40	0.0125335	0.175
	607965	608309		+	-	NGK_0744	Hypothetical	hypothetical protein	490	2756	1.15464e-05	0.177794
657285	657285	657398		+	-	NGK_0806	Hypothetical	hypothetical protein	123	689	0.000372294	0.17852
	2007950	2008774	2008774	+	-	NGK_2410	Hypothetical	hypothetical protein	70	375	1.66632e-05	0.186667
	1977374	1977796		+	-	NGK_2374	Hypothetical	hypothetical protein	6	32	0.0468913	0.1875
	1220249	1221211		+	-	NGK_1477	Hypothetical	hypothetical protein	6	32	0.0102618	0.1875
	1449439	1449008		-	-	NGK_1748	Hypothetical	hypothetical protein	16	82	0.0163013	0.195122
	1128501	1128644		+	-	NGK_1361	Hypothetical	hypothetical protein	251	1259	0.000277214	0.199365
	410405	409401		-	-	NGK_0500	Hypothetical	hypothetical protein	15	74	0.00291853	0.202703
	1399050	1399322		+	-	NGK_1687	Hypothetical	hypothetical protein	35	170	0.011198	0.205882
	1072803	1073114		+	-	NGK_1304	Hypothetical	hypothetical protein	23	111	0.0240341	0.207207
	995666	995532		-	-	NGK_1220	Hypothetical	hypothetical protein	4	19	0.0468913	0.210526
	373896	374177	374177	+	-	NGK_0451	Hypothetical	hypothetical protein	131	616	0.00113058	0.212662
	701413	700832		-	-	NGK_0865	Hypothetical	hypothetical protein	15	70	0.0261508	0.214286
	420041	421009		+	-	NGK_0514	Hypothetical	hypothetical protein	12	56	0.0125188	0.214286
449323	449323	449643	449643	+	-	NGK_0543	Hypothetical	hypothetical protein	68	316	0.00374188	0.21519
	1889237	1889593	1889593	+	-	NGK_2277	Hypothetical	hypothetical protein	48	218	0.00785739	0.220183
	419217	420041		+	-	NGK_0513	Hypothetical	hypothetical protein	33	148	0.00573485	0.222973
1706066	1706066	1705878	1705863	-	-	NGK_2063	Hypothetical	hypothetical protein	360	1613	0.00135879	0.223187
480458	480458	481048	481048	+	-	NGK_0578	Hypothetical	hypothetical protein	124	503	0.00789463	0.246521
	520357	521316		+	-	NGK_0625	Hypothetical	hypothetical protein	141	559	0.0148206	0.252236
	2060794	2060114		-	-	NGK_2469	Hypothetical	hypothetical protein	28	110	0.0394137	0.254545
1332787	1332787	1332674	1332674	-	-	NGK_1599	Hypothetical	hypothetical protein	186	707	0.0441985	0.263083
	700301	699786		-	-	NGK_0862	Lipoprotein	putative lipoprotein	3	67	1.95463e-33	0.0447761
	1284602	1285120		+	-	NGK_1545	Lipoprotein	Lipoprotein	7	89	2.2919e-12	0.0786517
	1763852	1764538		+	-	NGK_2127	Lipoprotein	RlpA-like protein	3	21	0.00238715	0.142857
	1392319	1393395		+	-	NGK_1675	Membrane	ApbE protein	1	24	1.01148e-22	0.0416667
	405821	406426		+	-	NGK_0493	Membrane	membrane protein	1	24	2.6908e-27	0.0416667
	432746	432366		-	-	NGK_0525	Membrane	Periplasmic protein	1	20	1.06511e-21	0.05
	573443	573234	573234	-	-	NGK_0696	Membrane	putative outer membrane peptidase	43	718	3.60703e-44	0.0598886
	917293	917859		+	-	NGK_1120	Membrane	Periplasmic protein	12	63	0.0134913	0.190476
	1286528	1286836		+	-	NGK_1549	Membrane	membrane protein	27	139	0.00896957	0.194245
	1315385	1316050		+	fabG	NGK_1582	Metabolism	3-ketoacyl-ACP reductase	1	38	1.04733e-49	0.0263158
	599514	599765		+	-	NGK_0733	Metabolism	glutamate dehydrogenase	1	30	1.11434e-43	0.0333333
	2089160	2088351		-	-	NGK_2493	Metabolism	dihydrodipicolinate reductase	5	49	6.69751e-07	0.102041
	67034	68032		+	-	NGK_0089	Metabolism	putative lipo-oligosaccharide acyltransferase	2	19	0.000522275	0.105263
	703587	704471		+	metF	NGK_0870	Metabolism	5,10-methylenetetrahydrofolate reductase	20	142	6.64685e-08	0.140845
	325058	325777		+	rnc	NGK_0397	Metabolism	ribonuclease III	6	42	0.000927661	0.142857
	1058397	1057369		-	-	NGK_1288	Metabolism	putative murein hydrolase	8	54	0.000230568	0.148148
	2190380	2190772		+	-	NGK_2605	Metabolism	ClpXP protease specificity-enhancing factor	6	38	0.0115628	0.157895
	285836	285198		-	hisH	NGK_0344	Metabolism	imidazole glycerol phosphate synthase subunit HisH	7	44	0.0105733	0.159091
	1457346	1456423		-	-	NGK_1758	Metabolism	agmatinase	17	101	4.05842e-05	0.168317
	421731	422495		+	hemD	NGK_0516	Metabolism	uroporphyrinogen-III synthase	9	50	0.00666894	0.18
655102	655102	656112		+	-	NGK_0802	Metabolism	ADP-heptose--LPS heptosyltransferase II	37	172	0.00137575	0.215116
	1293538	1292345		-	-	NGK_1554	Metabolism	aromatic amino acid aminotransferase	8	37	0.0298537	0.216216
	223363	222368		-	-	NGK_0277	Metabolism	ornithine carbamoyltransferase	23	96	0.0159772	0.239583
	1922063	1921428	1921428	-	-	NGK_2318	Metabolism	protein PncA	156	597	0.0142171	0.261307
	1792874	1793902		+	lpxC	NGK_2163	Metabolism	UDP-3-O-[3-hydroxymyristoyl] N-acetylglucosamine deacetylase	45	172	0.0149505	0.261628
	828978	828505		-	-	NGK_1016	Metabolism	putative bacterioferritin B	102	381	0.016996	0.267717
1921391	1921391	1920423		-	-	NGK_2317	Metabolism	RfaC	115	411	0.0355046	0.279805
1444521	1444521	1443943	1443943	-	-	NGK_1739	Other	protein MdaB	509	2118	0.0106791	0.240321
640424	640424	640756	640756	+	-	NGK_0788	Phage Associated	putative phage associated protein	2	240	0	0.00833333
	950702	950562		-	-	NGK_1166	Phage Associated	putative phage associated protein	1	48	0	0.0208333
	1215641	1215865		+	-	NGK_1467	Phage Associated	putative phage associated protein	1	40	9.38142e-192	0.025
	1209979	1210797		+	-	NGK_1458	Phage Associated	putative phage associated protein	7	91	3.85687e-16	0.0769231
	634652	634861		+	-	NGK_0782	Phage Associated	putative phage associated protein	6	72	1.75144e-12	0.0833333
	531149	530925		-	-	NGK_0642	Phage Associated	putative phage associated protein	3	35	3.44211e-10	0.0857143
	1684519	1683677		-	-	NGK_2037	Phage Associated	putative phage associated protein	5	53	1.36303e-07	0.0943396
	637212	637754		+	-	NGK_0786	Phage Associated	putative phage associated protein	2	19	9.35256e-05	0.105263
	530928	530437		-	-	NGK_0641	Phage Associated	putative phage associated protein	3	27	1.77871e-06	0.111111
	1201162	1200293		-	-	NGK_1442	Phage Associated	putative phage associated protein	11	94	2.48841e-08	0.117021
	1596336	1596121		-	-	NGK_1923	Phage Associated	putative phage associated protein	2	17	5.55794e-05	0.117647
	632571	632951		+	-	NGK_0777	Phage Associated	putative phage associated protein	25	176	5.35477e-06	0.142045
941629	941629	941892	941892	+	-	NGK_1145	Phage Associated	putative phage associated protein	1396	6884	0.00266667	0.202789
	2168665	2168835		+	-	NGK_2578	Pilin	pilS cassette	2	17	1.16003e-07	0.117647
1794061	1794061	1794438	1794438	+	-	NGK_2164	Pilin	PilE/pilin (PilE)	62	305	0.00110823	0.203279
	1489840	1490277		+	-	NGK_1796	Pilin	pilin	30	128	0.0351737	0.234375
	239821	240204		+	-	NGK_0296	Regulator	protein DagK	5	97	8.093e-27	0.0515464
	1634552	1634241		-	-	NGK_1972	Regulator	putative ArsR-family transcriptional regulator	2	31	6.73772e-11	0.0645161
161244	161244	161573		+	-	NGK_0204	Regulator	DNA-binding protein Fis	26	266	2.4836e-13	0.0977444
	1890474	1890208		-	-	NGK_2278	Replication	MafI protein	2	38	1.11424e-22	0.0526316
	1364891	1363074		-	-	NGK_1637	Replication	protein MafB3	14	129	7.12811e-16	0.108527
	581984	581532	581532	-	-	NGK_0710	Replication	MAFB alternative C-terminus	39	311	2.35441e-10	0.125402
	574690	574343		-	-	NGK_0700	Replication	MafI protein	18	124	0.000100023	0.145161
	575302	575168		-	-	NGK_0702	Replication	MafB-like protein	14	75	0.02189	0.186667
	1050798	1051298		+	-	NGK_1283	Stress	chaperone protein HscB	4	29	0.000521618	0.137931
	1146286	1145594		-	-	NGK_1378	Stress	molecuar chaperone DnaJ	10	48	0.0338092	0.208333
361053	361053	360181	360181	-	-	NGK_0436	Transcription	RNA polymerase factor sigma-32	272	976	0.0332498	0.278689
	2186540	2186782	2186782	+	rpmE	NGK_2600	Translation	50S ribosomal protein L31	180	1099	4.35388e-07	0.163785
	1708454	1708299		-	rpmG	NGK_2068	Translation	50S ribosomal protein L33	340	1862	7.57998e-06	0.182599
2043000	2043000	2043362	2043362	+	-	NGK_p5	Translation	30S ribosomal protein S13	1907	9948	0.00896957	0.191697
262823	262830	263099	263099	+	rpsO	NGK_0320	Translation	30S ribosomal protein S15	1170	5931	0.000927749	0.197269
372093	372093	373148		+	pheS	NGK_0448	Translation	phenylalanyl-tRNA synthetase subunit alpha	43	191	0.00142408	0.225131
	1102540	1102310	1102310	-	rpsR	NGK_1338	Translation	30S ribosomal protein S18	465	1984	0.00362206	0.234375
	368717	370663		+	thrS	NGK_0443	Translation	threonyl-tRNA synthetase	114	476	0.0060006	0.239496
	370798	371202	371202	+	-	NGK_0444	Translation	translation initiation factor 3	78	317	0.0160964	0.246057
	494516	493251		-	hisS	NGK_0594	Translation	histidyl-tRNA synthetase	58	199	0.0465041	0.291457
	753311	752958		-	-	NGK_0928	Transport	sulfate ABC transporter substrate-binding protein	4	42	2.93423e-06	0.0952381
	1848855	1848124		-	-	NGK_2225	Transport	Putative ABC transporter ATP-binding protein, amino acid	19	122	6.56754e-06	0.155738
	151309	152688		+	-	NGK_0190	Transport	NhaC	16	91	8.75873e-05	0.175824
	1850174	1849515		-	-	NGK_2227	Transport	Putative ABC transporter permease, amino acid	35	183	0.000331263	0.191257
	1097180	1098553		+	-	NGK_1329	Transport	ABC transporter permease	5	25	0.0333628	0.2
	265482	266369		+	-	NGK_0324	Transport	Spermidine/putrescine ABC transporter, permease protein	47	221	0.000656295	0.21267
911398	911398	913200		+	-	NGK_1114	Transport	putative ABC-transporter, ATP-binding protein	83	306	0.0280459	0.271242
	647929	645179	645179	-	-	NGK_0792	Transport	preprotein translocase subunit SecA	57	205	0.0329267	0.278049
127516	127531	127974	127974	+	-	NGK_0161	Transport	preprotein translocase subunit SecB	643	2303	0.0359202	0.279201
	573688	573443		-	-	NGK_0697	Transport	autotransporter serine protease (AusP)	209	712	0.0447706	0.293539
1317443			1317518	+	-	NGK_trnaMet1	tRNA	Met tRNA	2368	8195	0.0396746	0.288957
	428146	426257		-	-	NGK_0520	DNA Metabolism	Putative stress-sensitive restriction system protein	37	8	7.65197e-08	4.625
430224	430224	429181		-	-	NGK_0522	DNA Metabolism	site-specific DNA-methyltransferase M.NgoVII	60	11	1.12273e-11	5.45455
	429184	428147		-	-	NGK_0521	DNA Metabolism	restriction endonuclease R.NgoVII	58	6	7.27194e-31	9.66667
2105578	2105578	2104385	2104385	-	-	NGK_2507	Energy Metabolism	protein CcpR	78	32	0.0039309	2.4375
	799254	799595		+	-	NGK_0983	Energy Metabolism	putative ferredoxin	113	33	0.000474342	3.42424
	1017831	1017085		-	-	NGK_1243	Hypothetical	hypothetical protein	87	42	0.0375552	2.07143
	743520	743864	743864	+	-	NGK_0914	Hypothetical	hypothetical protein	153	66	0.0287803	2.31818
	1745098	1744466		-	-	NGK_2110	Hypothetical	hypothetical protein	34	13	0.0354215	2.61538
800292	800292	800411		+	-	NGK_0986	Hypothetical	hypothetical protein	167	62	0.0386139	2.69355
	1100412	1101218		+	-	NGK_1334	Hypothetical	hypothetical protein	37	13	0.0123976	2.84615
	914930	915238		+	-	NGK_1117	Hypothetical	hypothetical protein	46	14	0.0323523	3.28571
393128	393128	393607	393607	+	-	NGK_0472	Hypothetical	hypothetical protein	1379	410	0.00013115	3.36341
	800408	800605	800605	+	-	NGK_0987	Hypothetical	hypothetical protein	336	98	7.79743e-05	3.42857
767831	767831	768217	768217	+	-	NGK_0943	Hypothetical	hypothetical protein	403	116	5.07197e-07	3.47414
	1911644	1912510		+	-	NGK_2305	Hypothetical	hypothetical protein	60	17	0.000177479	3.52941
	893523	893344		-	-	NGK_1092	Hypothetical	hypothetical protein	46	13	0.0405674	3.53846
	1639513	1639857		+	-	NGK_1979	Hypothetical	hypothetical protein	78	20	0.000408726	3.9
	135669	135872		+	-	NGK_0169	Hypothetical	hypothetical protein	29	7	0.0355046	4.14286
	1639857	1640549		+	-	NGK_1980	Hypothetical	hypothetical protein	21	5	0.010705	4.2
	417302	417418		+	-	NGK_0509	Hypothetical	hypothetical protein	105	24	0.00239712	4.375
	313770	313931		+	-	NGK_0375	Hypothetical	hypothetical protein	23	5	0.0146751	4.6
	986400	986519		+	-	NGK_1205	Hypothetical	hypothetical protein	19	4	0.00992658	4.75
	612491	612871		+	-	NGK_0750	Hypothetical	hypothetical protein	68	14	6.59838e-06	4.85714
	649412	649921		+	-	NGK_0796	Hypothetical	hypothetical protein	39	8	0.000273781	4.875
526727	526727	526849		+	-	NGK_0634	Hypothetical	hypothetical protein	39	8	0.000971143	4.875
	688202	688032		-	-	NGK_0846	Hypothetical	hypothetical protein	74	14	3.16866e-05	5.28571
	168598	168407		-	-	NGK_0213	Hypothetical	hypothetical protein	50	9	5.9357e-05	5.55556
	1719472	1719600		+	-	NGK_2083	Hypothetical	hypothetical protein	17	3	0.00255374	5.66667
	1693767	1693943		+	-	NGK_2051	Hypothetical	hypothetical protein	34	6	5.73382e-05	5.66667
	1433542	1433390		-	-	NGK_1725	Hypothetical	hypothetical protein	32	5	3.6657e-05	6.4
	36496	36335		-	-	NGK_0049	Hypothetical	hypothetical protein	20	3	0.000434657	6.66667
	1433256	1433110		-	-	NGK_1724	Hypothetical	hypothetical protein	52	7	4.42685e-10	7.42857
	151035	151151		+	-	NGK_0189	Hypothetical	hypothetical protein	34	4	4.04261e-08	8.5
	569754	569608		-	-	NGK_0692	Hypothetical	hypothetical protein	160	17	5.72438e-19	9.41176
	1454700	1454572		-	-	NGK_1756	Hypothetical	hypothetical protein	40	4	6.27117e-11	10
	1163135	1162983		-	-	NGK_1397	Hypothetical	hypothetical protein	21	2	8.35688e-13	10.5
	353484	353633		+	-	NGK_0424	Hypothetical	hypothetical protein	23	2	2.10722e-23	11.5
	1490673	1490789		+	-	NGK_1798	Hypothetical	hypothetical protein	31	2	3.45217e-27	15.5
	737359	737195		-	-	NGK_0908	Hypothetical	hypothetical protein	33	2	5.92878e-51	16.5
	1228766	1229170		+	-	NGK_1487	Hypothetical	hypothetical protein	26	1	1.51368e-68	26
	487793	487458		-	-	NGK_0587	Hypothetical	hypothetical protein	29	1	1.04203e-241	29
	1063997	1064116		+	-	NGK_1293	Hypothetical	hypothetical protein	59	2	1.92477e-106	29.5
393618	393618	393749	393749	+	-	NGK_0473	Hypothetical	hypothetical protein	9859	8	0	1232.38
	1349510	1348659		-	-	NGK_1616	Iron	TonB	209	70	2.48002e-05	2.98571
	1472687	1470597		-	tbpB	NGK_1772	Iron	TbpB	69	23	3.96798e-05	3
	1846807	1845920		-	-	NGK_2221	Iron	HemK protein	52	17	0.00176493	3.05882
291312	291312	290317	290317	-	fbpA	NGK_0350	Iron	Major ferric iron-binding protein	406	121	5.41213e-06	3.35537
1470510	1470510	1467766		-	tbpA	NGK_1771	Iron	transferrin-binding protein A	114	22	7.98419e-18	5.18182
	288711	287653		-	fbpC	NGK_0348	Iron	Fe(3+) ions import ATP-binding protein fbpC	40	7	3.1432e-10	5.71429
	1801770	1800922		-	-	NGK_2174	Membrane	membrane protein	73	36	0.0457281	2.02778
	1873892	1874542		+	-	NGK_2257	Membrane	Periplasmic protein	110	54	0.0351737	2.03704
611443	611443	612129	612156	+	-	NGK_0749	Membrane	outer membrane protein	559	251	0.01836	2.22709
	1862656	1862075	1862075	-	-	NGK_2242	Membrane	membrane protein	88	34	0.0126295	2.58824
	1938192	1937743		-	-	NGK_2337	Membrane	membrane protein	34	11	0.0306538	3.09091
	774526	773846		-	-	NGK_0953	Membrane	membrane protein	28	8	0.0138826	3.5
	1910719	1911168	1911168	+	-	NGK_2303	Membrane	membrane protein	240	60	6.75091e-08	4
	1383331	1383621		+	-	NGK_1665	Membrane	C4-dicarboxylate-binding periplasmic protein	42	10	0.00318741	4.2
	1340493	1339084	1339084	-	-	NGK_1605	Membrane	membrane protein	56	1	0	56
	1590210	1591097		+	-	NGK_1916	Metabolism	glutamyl-Q tRNA(Asp) synthetase	79	35	0.0174762	2.25714
	26945	26304		-	pyrE	NGK_0037	Metabolism	orotate phosphoribosyltransferase	57	23	0.0256242	2.47826
	2206130	2207026		+	glyQ	NGK_2628	Metabolism	glycyl-tRNA synthetase subunit alpha	72	29	0.00909767	2.48276
	95144	93888		-	-	NGK_0123	Metabolism	PglB protein	25	10	0.0265763	2.5
	831544	830921		-	lipB	NGK_1020	Metabolism	lipoate-protein ligase B	129	51	0.00330365	2.52941
	2092289	2091258		-	-	NGK_2498	Metabolism	glyceraldehyde-3-phosphate dehydrogenase	24	9	0.0234952	2.66667
1323361	1323401	1324735	1324735	+	-	NGK_1591	Metabolism	glutamate dehydrogenase	545	200	0.00526153	2.725
	597285	596803		-	-	NGK_0727	Metabolism	putative acyl-CoA hydrolase	41	15	0.0396746	2.73333
	1530695	1529874		-	-	NGK_1837	Metabolism	undecaprenyl pyrophosphate phosphatase	104	38	0.00103575	2.73684
	590238	591707		+	-	NGK_0720	Metabolism	putative succinate-semialdehyde dehydrogenase	28	10	0.00662675	2.8
	920137	919523		-	-	NGK_1123	Metabolism	Probable molybdopterin-guanine dinucleotide biosynthesis protein A	36	12	0.0203776	3
	1640616	1641836		+	argJ	NGK_1981	Metabolism	bifunctional ornithine acetyltransferase/N-acetylglutamate synthase	29	9	0.00177986	3.22222
	1023952	1023320		-	-	NGK_1250	Metabolism	pyridoxamine 5'-phosphate oxidase	85	24	0.000100023	3.54167
	619180	617792		-	fumC	NGK_0758	Metabolism	fumarate hydratase	117	33	3.73457e-07	3.54545
	1798728	1800326		+	-	NGK_2172	Metabolism	trifunctional thioredoxin/methionine sulfoxide reductase A/B protein	62	17	1.67873e-06	3.64706
	2080922	2081914		+	pdxA	NGK_2488	Metabolism	4-hydroxythreonine-4-phosphate dehydrogenase	29	7	2.68567e-05	4.14286
568998	568998	568429		-	-	NGK_0690	Metabolism	putative acyl-CoA hydrolase	79	19	5.39073e-06	4.15789
	731377	732843		+	-	NGK_0901	Metabolism	putative phopholipase D-family protein	17	4	0.000269066	4.25
	656947	656783		-	-	NGK_0804	Metabolism	thymidylate kinase	39	8	0.0026551	4.875
	2132749	2132231		-	-	NGK_2538	Metabolism	putative glucokinase	62	11	2.52408e-08	5.63636
	1828601	1829233		+	-	NGK_2203	Metabolism	putative hydrolase	33	5	9.63691e-08	6.6
	10814	11092		+	-	NGK_0014	Metabolism	putative modification methylase	46	4	4.54941e-29	11.5
	2149540	2147180		-	-	NGK_2557	Metabolism	FetA	15	1	1.16023e-28	15
	1181061	1181297		+	-	NGK_1417	Phage Associated	Putative pemI-like protein (PemI) phage associated protein	260	107	0.0125335	2.42991
1187520	1187520	1187966		+	-	NGK_1426	Phage Associated	putative phage associated protein	393	146	0.000277214	2.69178
	631329	631679		+	-	NGK_0775	Phage Associated	Putative phage repressor phage associated protein	59	20	0.022194	2.95
	1214627	1214788		+	-	NGK_1465	Phage Associated	putative phage associated protein	35	10	0.0457281	3.5
	1203102	1202695		-	-	NGK_1444	Phage Associated	putative phage associated protein	19	5	0.0413493	3.8
	1657168	1656890		-	-	NGK_1995	Phage Associated	putative phage associated protein	24	4	8.56187e-07	6
	1192781	1192251		-	-	NGK_1435	Phage Associated	putative phage associated protein	17	1	1.56085e-18	17
	2180061	2179294		-	-	NGK_2588	Regulator	AraC family transcriptional regulator	37	9	0.000106016	4.11111
	922110	922766		+	-	NGK_1125	Regulator	NarL/NarP	15	3	0.000786507	5
	1931887	1932537		+	-	NGK_2331	Replication	protein FtsE	202	80	0.00137764	2.525
	1568172	1569113		+	-	NGK_1885	Replication	protein MafA3	28	11	0.0367529	2.54545
	1365836	1364895		-	-	NGK_1638	Replication	protein MafA3	27	9	0.00603739	3
	626930	627538		+	-	NGK_0768	Replication	putative DNA polymerase III subunit	15	2	1.23053e-05	7.5
	464284	464168		-	-	NGK_0561	Stress	heat shock protein HtpX	80	18	0.00287993	4.44444
	703396	703121		-	rpmE2	NGK_0869	Translation	50S ribosomal protein L31	605	284	0.0195035	2.13028
	2215434	2214709		-	-	NGK_2638	Translation	16S ribosomal RNA methyltransferase RsmE	38	11	0.00215697	3.45455
	1347928	1347494	1347494	-	-	NGK_1614	Transport	ExbD protein	237	97	0.00296216	2.4433
	1079166	1080536		+	-	NGK_1310	Transport	putative sodium-dependent transport protein	23	8	0.0194256	2.875
	1852047	1853273		+	-	NGK_2229	Transport	putative permease	20	6	0.00370034	3.33333
	72059	71862		-	-	NGK_0097	Transport	sugar ABC transporter, ATP-binding protein	47	13	0.0279285	3.61538
2187489	2187489	2187674		+	-	NGK_2601	Transport	protein CadD	137	36	0.000612752	3.80556
	1326103	1326330		+	-	NGK_1594	Transport	L-lactate permease-like protein	24	5	0.000863356	4.8
	167620	168273		+	-	NGK_0212	Transposase	IS1016 transposase	21	6	0.0117513	3.5
	724758	725336		+	-	NGK_0892	Transposase	putative IS150 ORF B	16	3	0.00158893	5.33333
	1961093	1960644		-	-	NGK_2356	Transposase	IS1106 transposase	15	1	8.89961e-12	15
	79881	80330		+	-	NGK_0107	Transposase	IS1106 transposase	46	2	1.97309e-65	23
	257962	257513		-	-	NGK_0315	Transposase	IS1106 transposase	60	1	0	60
1266806			1266730	-	-	NGK_trnaIle1	tRNA	Ile tRNA	2861	1282	0.0177485	2.23167
60469			60544	+	-	NGK_trnaLys1	tRNA	Lys tRNA	6092	2703	0.0464746	2.25379
1218485			1218401	-	-	NGK_trnaLeu5	tRNA	Leu tRNA	1104	485	0.00808199	2.27629
526529			526618	+	-	NGK_trnaSer3	tRNA	Ser tRNA	1937	802	0.00260424	2.41521
1728193			1728117	-	-	NGK_trnaIle3	tRNA	Ile tRNA	3026	1243	0.00630773	2.43443
1624294			1624218	-	-	NGK_trnaIle2	tRNA	Ile tRNA	2960	1039	0.0002673	2.84889
1704417			1704346	-	-	NGK_tRNAArg4	tRNA	Arg tRNA	3560	1080	4.54926e-06	3.2963
207751			207826	+	-	NGK_trnaGly3	tRNA	Gly tRNA	25541	7710	0.0102219	3.31271
1529529			1529605	+	-	NGK_trnaMet2	tRNA	Met tRNA	25363	7420	0.0043537	3.41819
1584939			1584864	-	-	NGK_trnaPhe1	tRNA	Phe tRNA	42100	12295	0.00330365	3.42416
526362			526452	+	-	NGK_trnaSer2	tRNA	Ser tRNA	6504	1699	3.48044e-09	3.82813
1936667			1936592	-	-	NGK_trnaLys2	tRNA	Lys tRNA	4957	1241	1.22156e-08	3.99436
1292205			1292280	+	-	NGK_trnaArg3	tRNA	Arg tRNA	4524	894	2.95476e-18	5.0604
654896			654971	+	-	NGK_trnaAsn1	tRNA	Asn tRNA	63516	12399	6.23923e-08	5.12267
820845			820759	-	-	NGK_trnaLeu4	tRNA	Leu tRNA	12297	2384	4.31014e-12	5.15814
2095627			2095703	+	-	NGK_trnaAsp1	tRNA	Asp tRNA	25998	4894	5.45822e-12	5.31222
2073693			2073618	-	-	NGK_trnaThr3	tRNA	Thr tRNA	8726	1592	7.00042e-19	5.48116
2095851			2095927	+	-	NGK_trnaAsp2	tRNA	Asp tRNA	16858	2847	7.26878e-17	5.92132
1822055			1822131	+	-	NGK_trnaMet3	tRNA	Met tRNA	120979	16913	1.75528e-09	7.15302
296630			296706	+	-	NGK_trnaPro2	tRNA	Pro tRNA	4203	573	4.67595e-41	7.33508
820720			820630	-	-	NGK_trnaSer4	tRNA	Ser tRNA	22029	2758	7.99197e-35	7.98731
368621			368697	+	-	NGK_trnaVal1	tRNA	Val tRNA	30872	3670	3.46273e-41	8.41199
143544			143468	-	-	NGK_trnaPro1	tRNA	Pro tRNA	6515	760	2.17493e-63	8.57237
14066			13981	-	-	NGK_trnaLeu1	tRNA	Leu tRNA	36238	3939	4.42369e-49	9.1998
2011781			2011856	+	-	NGK_trnaTrp1	tRNA	Trp tRNA	5272	566	4.31671e-72	9.31449
501306			501381	+	-	NGK_trnaThr1	tRNA	Thr tRNA	17875	1751	8.82587e-88	10.2085
207852			207925	+	-	NGK_trnaCys1	tRNA	Cys tRNA	86133	7362	1.66682e-62	11.6997
217789			217873	+	-	NGK_trnaLeu3	tRNA	Leu tRNA	49029	3447	2.8752e-144	14.2237
2010270			2010353	+	-	NGK_trnaTyr1	tRNA	Tyr tRNA	28348	1616	0	17.5421
208026			208115	+	-	NGK_trnaLeu2	tRNA	Leu tRNA	31416	1267	0	24.7956
2095743			2095818	+	-	NGK_trnaVal3	tRNA	Val tRNA	172766	5197	0	33.2434
2095519			2095594	+	-	NGK_trnaVal2	tRNA	Val tRNA	174187	5230	0	33.3054
